# Supplementary material
Source: PubMed Central journal article supplement (PMC4300267)

## Supporting Information

### Table of Contents:

|                                                    |       |
|----------------------------------------------------|-------|
| General Procedures.....                            | SI-2  |
| Ketone <b>9</b> .....                              | SI-3  |
| Triflate <b>11</b> .....                           | SI-3  |
| Ester <b>S1</b> .....                              | SI-4  |
| Cycloadducts <b>12</b> and <b>13</b> .....         | SI-4  |
| Decarboxylation Product <b>20</b> .....            | SI-5  |
| Polycycle <b>17</b> .....                          | SI-6  |
| Chatancin ( <b>1</b> ).....                        | SI-7  |
| Polycycle <b>14</b> .....                          | SI-7  |
| Polycycle <b>15</b> .....                          | SI-8  |
| X-ray Crystallographic Analysis of <b>12</b> ..... | SI-9  |
| X-ray Crystallographic Analysis of <b>15</b> ..... | SI-18 |
| X-ray Crystallographic Analysis of <b>1</b> .....  | SI-28 |
| NMR spectra.....                                   | SI-38 |

## General Procedures

Unless otherwise stated, all reactions were performed in oven-dried or flame-dried glassware under an atmosphere of dry nitrogen or argon. Dry tetrahydrofuran (THF), dichloromethane, toluene, hexane, acetonitrile (MeCN), dimethylformamide (DMF), and diethyl ether (Et<sub>2</sub>O) were obtained by passing these previously degassed solvents through activated alumina columns. Amines and alcohols were distilled from calcium hydride prior to use. Sulfuryl chloride (SO<sub>2</sub>Cl<sub>2</sub>) was distilled prior to use and the fraction boiling at 70 °C collected. The (*S*)-dihydrofarnesal employed displayed the following optical properties:  $[\alpha]_D^{20} = -12.0^\circ$  (c = 0.017 g/ml, CHCl<sub>3</sub>); reduction of this material to (*S*)-dihydrofarnesol and protection as a *p*-methoxybenzyl (PMB) ether produced a compound with 90% enantiomeric excess (ee) as determined by chiral HPLC analysis (Chiralpak OJ column). Reactions were monitored by thin layer chromatography (TLC) on Silicycle Siliaplate™ G TLC plates (250 μm thickness, 60 Å porosity, F-254 indicator) and visualized by UV irradiation and staining with *p*-anisaldehyde, phosphomolybdic acid, or potassium permanganate developing agents. Volatile solvents were removed under reduced pressure using a rotary evaporator. Flash column chromatography was performed using Silicycle F60 silica gel (60Å, 230-400 mesh, 40-63 μm). Proton nuclear magnetic resonance (<sup>1</sup>H NMR) and carbon nuclear magnetic resonance (<sup>13</sup>C NMR) spectra were recorded on Bruker AV-500 or AV-600 spectrometers operating respectively at 500, and 600 MHz for <sup>1</sup>H, and 125, and 151 MHz for <sup>13</sup>C. Chemical shifts are reported in parts per million (ppm) with respect to the residual solvent signal CDCl<sub>3</sub> (<sup>1</sup>H NMR: δ = 7.26; <sup>13</sup>C NMR: δ = 77.16). Peak multiplicities are reported as follows: s = singlet, bs = broad singlet, d = doublet, t = triplet, p = pentet, dd = doublet of doublets, td = triplet of doublets, m = multiplet. app = apparent. Melting points were determined using MEI-TEMP™ apparatus and are uncorrected. IR spectra were recorded on a Nicolet 380 FT-IR spectrometer. High-resolution mass spectra (HRMS) were obtained by the qb3 mass spectrometry facility at the University of California, Berkeley. Optical rotations were measured on a Perkin-Elmer 241 polarimeter. X-ray crystallographic analyses were performed at the UC-Berkeley College of Chemistry X-ray crystallographic facility.

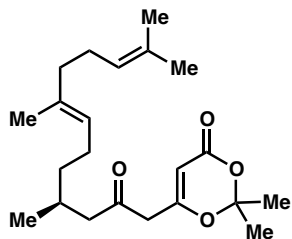

**Ketone 9.**  $\text{BF}_3 \cdot \text{OEt}_2$  (1.0 mL, 8.1 mmol, 1.5 equiv) was added to a solution of aldehyde **6** (1.19 g, 5.4 mmol, 1 equiv) and silyl ketene acetal **7** (1.3 g, 6.1 mmol, 1.1 equiv) in  $\text{CH}_2\text{Cl}_2$  (40 mL) over a period of 30 min at  $-78^\circ\text{C}$ . The reaction mixture was stirred for another 30 min at this temperature before solid  $\text{NaHCO}_3$  (1.4 g, 16.7 mmol, 3 equiv) and Dess-Martin periodinane (3.4 g, 8.0 mmol, 1.5 equiv) were added. The resulting mixture was slowly warmed to room temperature and stirred overnight. After 8 hours, an additional portion of  $\text{NaHCO}_3$  (1.4 g, 16.7 mmol, 3 equiv) and Dess-Martin periodinane (3.4 g, 8.0 mmol, 1.5 equiv) was added and the mixture stirred for an additional 1 hour at room temperature. A saturated solution of  $\text{Na}_2\text{S}_2\text{O}_3 \cdot 5\text{H}_2\text{O}$  (50 mL) was slowly added at  $0^\circ\text{C}$  and the reaction mixture stirred for 30 min. The aqueous phase was extracted with  $\text{CH}_2\text{Cl}_2$  (2 x 100 mL), washed with saturated aqueous  $\text{NaHCO}_3$  (100 mL), brine (100 mL), and the combined organic phases dried ( $\text{MgSO}_4$ ) and concentrated *in vacuo*. Purification by silica gel flash column chromatography (ethyl acetate/hexane) gave ketone **9** (1.2 g, 62%) as a colorless oil:  $[\alpha]_D^{20} = -4.8^\circ$  ( $c = 0.014$  g/mL,  $\text{CHCl}_3$ );  $^1\text{H NMR}$  (500 MHz,  $\text{CDCl}_3$ )  $\delta$  5.32 (s, 1H), 5.07 (dddt,  $J = 7.0, 5.8, 3.0, 1.5$  Hz, 2H), 3.29 (d,  $J = 1.2$  Hz, 2H), 2.48 (dd,  $J = 16.4, 5.5$  Hz, 1H), 2.30 (dd,  $J = 16.4, 8.1$  Hz, 1H), 2.12 - 1.87 (m, 7H), 1.70 (s, 6H), 1.66 (s, 3H), 1.58 (dd,  $J = 2.7, 1.4$  Hz, 6H), 1.38 - 1.26 (m, 1H), 1.26 - 1.12 (m, 1H), 0.91 (d,  $J = 6.6$  Hz, 3H);  $^{13}\text{C NMR}$  (151 MHz,  $\text{CDCl}_3$ )  $\delta$  203.1, 164.7, 160.8, 135.6, 131.5, 124.4, 124.0, 107.3, 96.8, 50.7, 47.6, 39.8, 36.9, 28.9, 26.8, 25.8, 25.4, 25.2, 25.2, 19.8, 17.8, 16.1; IR (thin film,  $\text{cm}^{-1}$ ) 2962, 2920, 2852, 1732, 1638, 1391, 1376, 1272, 1015; HRMS (ESI) calcd. for  $[\text{C}_{22}\text{H}_{35}\text{O}_4]^+$  ( $\text{M}+\text{H}$ ) $^+$ :  $m/z$  363.2530, found 363.2533.

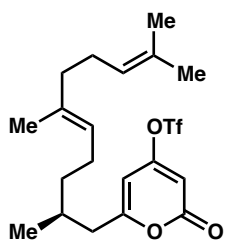

**Triflate 11.** Ketone **9** (600 mg, 1.66 mmol, 1 equiv) in toluene (20 mL) was added over a period of 50 minutes to refluxing toluene (145 mL). The solution was heated for an additional 30 minutes, cooled to room temperature, diluted with dry DCM (100 mL), and cooled to  $-78^\circ\text{C}$ .  $\text{Et}_3\text{N}$  (0.6 mL, 4.1 mmol, 2.5 equiv) was added, followed by the dropwise addition of  $\text{Tf}_2\text{O}$  (280  $\mu\text{L}$ , 1.66 mmol, 1 equiv). The resulting mixture was stirred for 1 hour at  $-78^\circ\text{C}$  and then quenched with saturated aqueous  $\text{NaHCO}_3$  solution (25 mL). The organic layer was separated and the aqueous layer was extracted with  $\text{Et}_2\text{O}$  (3 x 50 mL). The combined organic layers were washed with brine, dried over  $\text{MgSO}_4$ , and concentrated *in vacuo*. Purification by silica gel flash

column chromatography (ethyl acetate/hexane) afforded triflate **11** (484 mg, 67%) as a colorless oil:  $[\alpha]_D^{20} = -6.0^\circ$  (c = 0.014 g/ml, CHCl<sub>3</sub>); <sup>1</sup>H NMR (500 MHz, CDCl<sub>3</sub>) δ 6.12 (d, *J* = 2.3 Hz, 1H), 6.03 (d, *J* = 2.2 Hz, 1H), 5.08 (dddq, *J* = 7.0, 5.7, 2.9, 1.6 Hz, 2H), 2.58 (dd, *J* = 14.3, 5.9 Hz, 1H), 2.31 (dd, *J* = 14.3, 8.4 Hz, 1H), 2.12 - 1.92 (m, 7H), 1.72 - 1.65 (m, 3H), 1.60 (s, 6H), 1.45 - 1.33 (m, 1H), 1.33 - 1.20 (m, 1H), 0.94 (d, *J* = 6.7 Hz, 3H); <sup>13</sup>C NMR (151 MHz, CDCl<sub>3</sub>) δ 168.7, 161.8, 161.0, 135.8, 131.5, 124.4, 123.7, 121.7, 119.6, 117.5, 115.4, 102.5, 100.0, 41.74, 39.8, 36.7, 31.5, 26.8, 25.8, 25.3, 19.3, 17.8, 16.1; IR (thin film, cm<sup>-1</sup>) 2963, 2921, 2854, 1753, 1643, 1576, 1435, 1249, 1215, 1140; HRMS (ESI) calcd. for [C<sub>20</sub>H<sub>28</sub>O<sub>5</sub>SF<sub>3</sub>]<sup>+</sup> (M+H)<sup>+</sup>: *m/z* 437.1604, found 437.1602.

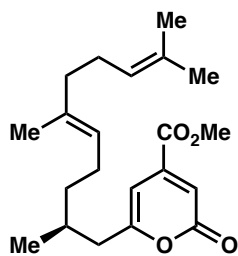

**Ester S1.** An oven-dried flask was charged with Pd(OAc)<sub>2</sub> (78 mg, 0.35 mmol, 10 mol %), DPEPhos (187 mg, 0.35 mmol, 10 mol %) and degassed CH<sub>3</sub>CN (5 mL). The resulting mixture was stirred for 15 min, and then a solution of triflate **11** (1.52 g, 3.47 mmol, 1 equiv) in degassed CH<sub>3</sub>CN (25 mL) was added, followed by degassed MeOH (6 mL) and <sup>i</sup>Pr<sub>2</sub>NEt (1.2 mL, 6.9 mmol, 2 equiv). CO gas was bubbled through the resulting mixture (via balloon) for approximately 5 minutes and the reaction stirred overnight under an atmosphere of CO. The reaction mixture was flushed thoroughly with a stream of nitrogen, diluted with Et<sub>2</sub>O (100 mL), and washed with brine. The organic layer was dried over MgSO<sub>4</sub>, and concentrated *in vacuo*. Purification by silica gel flash column chromatography (ethyl acetate/hexane) afforded ester **S1** (1.1 g, 90%) as a colorless oil:  $[\alpha]_D^{20} = -13.6^\circ$  (c = 0.018 g/ml, CHCl<sub>3</sub>); <sup>1</sup>H NMR (600 MHz, CDCl<sub>3</sub>) δ 6.76 (s, 1H), 6.41 (s, 1H), 5.07 (t, *J* = 7.1 Hz, 2H), 3.90 (s, 3H), 2.54 (dd, *J* = 14.3, 6.0 Hz, 1H), 2.28 (dd, *J* = 14.2, 8.3 Hz, 1H), 2.09 - 2.00 (m, 3H), 2.00 - 1.92 (m, 4H), 1.66 (s, 3H), 1.58 (s, 6H), 1.43 - 1.31 (m, 1H), 1.28 - 1.15 (m, 1H), 0.92 (d, *J* = 6.6 Hz, 3H); <sup>13</sup>C NMR (151 MHz, CDCl<sub>3</sub>) δ 166.3, 164.1, 162.7, 144.1, 135.5, 131.4, 124.4, 124.0, 115.3, 102.1, 53.3, 41.7, 39.8, 36.8, 31.5, 26.8, 25.8, 25.4, 19.4, 17.8, 16.1; IR (thin film, cm<sup>-1</sup>) 2958, 2919, 2851, 1733, 1639, 1563, 1256; HRMS (ESI) calcd. for [C<sub>21</sub>H<sub>31</sub>O<sub>4</sub>]<sup>+</sup> (M+H)<sup>+</sup>: *m/z* 347.2217, found 347.2216.

**Cycloadducts 12 and 13.** A solution of ester **S1** (1.0 g, 2.9 mmol, 1 equiv) in toluene (60 mL) was heated to 100 °C for 4 days. Upon cooling, the reaction mixture was concentrated *in vacuo* and the crude residue purified by silica gel flash column chromatography (ethyl acetate/hexanes) affording cycloadducts **12** (451 mg, 45%) and **13** (450 mg, 45%).

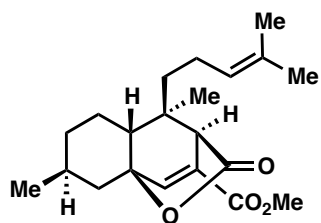

**Diastereomer 12:** White foam;  $[\alpha]_D^{20} = -16.6^\circ$  ( $c = 0.016$  g/ml,  $\text{CHCl}_3$ );  $^1\text{H NMR}$  (600 MHz,  $\text{CDCl}_3$ )  $\delta$  7.15 (d,  $J = 1.7$  Hz, 1H), 5.07 (td,  $J = 7.2, 3.7$  Hz, 1H), 3.80 (s, 3H), 3.69 (d,  $J = 1.8$  Hz, 1H), 2.26 (ddd,  $J = 12.8, 3.4, 1.9$  Hz, 1H), 2.14 (tt,  $J = 12.6, 6.5$  Hz, 1H), 1.92 (tt,  $J = 13.1, 6.4$  Hz, 1H), 1.74 (dq,  $J = 13.0, 3.1$  Hz, 1H), 1.69 – 1.54 (m, 9H), 1.52 – 1.40 (m, 3H), 1.08 – 0.98 (m, 4H), 0.85 – 0.72 (m, 4H);  $^{13}\text{C NMR}$  (151 MHz,  $\text{CDCl}_3$ )  $\delta$  172.7, 163.9, 141.3, 136.1, 132.2, 123.7, 83.9, 53.1, 52.5, 50.2, 44.0, 40.9, 40.4, 34.2, 29.6, 28.2, 25.8, 23.3, 22.1, 18.9, 17.8; IR (thin film,  $\text{cm}^{-1}$ ) 2926, 1757, 1724, 1220, 772; HRMS (ESI) calcd. for  $[\text{C}_{21}\text{H}_{30}\text{O}_4\text{Na}]^+$  ( $\text{M}+\text{Na}$ ) $^+$ :  $m/z$  369.2036, found 369.2038. Vapor diffusion of an ether solution of racemic **12** with pentane afforded X-ray quality crystals (m.p. = 92 - 94  $^\circ\text{C}$ ).

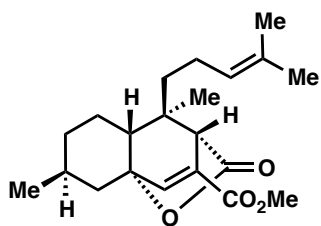

**Diastereomer 13:** colorless oil;  $[\alpha]_D^{20} = +4.1^\circ$  ( $c = 0.014$  g/ml,  $\text{CHCl}_3$ );  $^1\text{H NMR}$  (600 MHz,  $\text{CDCl}_3$ )  $\delta$  6.94 (d,  $J = 1.9$  Hz, 1H), 4.95 (tdd,  $J = 7.1, 2.9, 1.5$  Hz, 1H), 3.80 (s, 3H), 3.63 (d,  $J = 1.9$  Hz, 1H), 2.38 (ddd,  $J = 14.4, 3.5, 2.3$  Hz, 1H), 2.05 – 1.97 (m, 1H), 1.86 – 1.75 (m, 3H), 1.67 – 1.61 (m, 4H), 1.56 (s, 3H), 1.45 (qd,  $J = 13.1, 3.2$  Hz, 1H), 1.35 (dd,  $J = 14.4, 12.3$  Hz, 1H), 1.29 – 1.14 (m, 2H), 1.14 – 1.07 (m, 1H), 1.06 (s, 3H), 1.03 – 0.95 (m, 1H), 0.94 (d,  $J = 6.5$  Hz, 3H);  $^{13}\text{C NMR}$  (151 MHz,  $\text{CDCl}_3$ )  $\delta$  173.4, 163.9, 143.3, 134.3, 132.1, 123.8, 82.9, 52.8, 52.5, 45.7, 42.2, 41.7, 38.7, 34.1, 27.1, 25.8, 25.3, 22.6, 22.0, 21.0, 17.7; IR (thin film,  $\text{cm}^{-1}$ ) 2926, 1754, 1725, 1438, 1252; HRMS (EI) calcd. for  $[\text{C}_{21}\text{H}_{30}\text{O}_4\text{Na}]^+$  ( $\text{M}+\text{Na}$ ) $^+$ :  $m/z$  369.2036, found 369.2037.

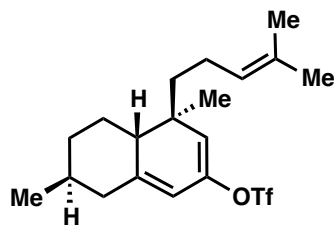

**Dienol triflate 20:** Colorless oil;  $^1\text{H NMR}$  (600 MHz,  $\text{CDCl}_3$ )  $\delta$  5.48 (q,  $J = 1.8$  Hz, 1H), 5.23 (d,  $J = 2.1$  Hz, 1H), 5.05 (ddt,  $J = 8.5, 7.1, 1.5$  Hz, 1H), 2.35 (ddd,  $J = 13.2, 4.3, 2.1$  Hz, 1H), 2.02 (dd,  $J = 12.7, 4.5$  Hz, 1H), 1.95 (dq,  $J = 11.4, 5.8$  Hz, 2H), 1.85 - 1.78 (m, 1H), 1.78 - 1.71 (m, 2H), 1.67 (d,  $J = 1.5$  Hz, 3H), 1.61 - 1.55 (m, 4H), 1.55 - 1.47 (m, 1H), 1.33 (qd,  $J = 12.8, 3.5$  Hz, 1H), 1.28 - 1.20 (m, 1H), 1.06 (qd,  $J = 13.2, 3.7$  Hz, 1H), 1.00 (s, 3H), 0.94 (d,  $J = 6.5$  Hz, 3H);  $^{13}\text{C NMR}$  (151 MHz,  $\text{CDCl}_3$ )  $\delta$  149.5, 144.8,

131.9, 124.4, 122.0, 120.9, 119.8, 117.7, 115.6, 111.8, 46.5, 44.0, 42.1, 38.4, 36.4, 35.3, 27.7, 25.8, 23.3, 22.4, 22.4, 17.7; IR (thin film,  $\text{cm}^{-1}$ ) 2925, 1421, 1210, 965, 772.

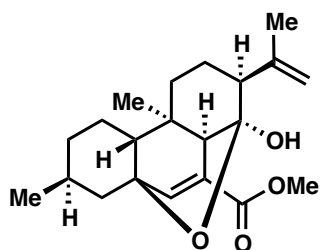

**Hemiketal 17.** *i.* A flame-dried round-bottom flask was charged with **12** (286 mg, 0.83 mmol, 1 equiv) and dry DCM (10 mL). The reaction was cooled to 0 °C and  $\text{Na}_2\text{CO}_3$  (350 mg, 3.3 mmol, 4 equiv) was added, followed by the dropwise addition of freshly distilled  $\text{SO}_2\text{Cl}_2$  (72  $\mu\text{L}$ , 0.9 mmol, 1.1 equiv). The reaction mixture was stirred for 30

minutes at this temperature and quenched by the addition of saturated aqueous  $\text{NaHCO}_3$  solution (10 mL). The organic layer was separated and the aqueous layer was extracted with  $\text{Et}_2\text{O}$  (30 mL). The combined organic layers were washed with brine, dried over  $\text{MgSO}_4$ , and concentrated *in vacuo* to give crude allylic chloride **16** (298 mg), which was sufficiently pure for the ensuing step.

*ii.* The above crude allylic chloride (220 mg, 0.58 mmol, 1 equiv) was dissolved in dry THF (10 mL) and treated with activated zinc (751 mg, 11.6 mmol, 20 equiv) under an atmosphere of nitrogen. The reaction vessel was sealed and heated to reflux for 24 hours. Upon cooling, the reaction mixture was filtered through a short plug of silica gel eluting with  $\text{Et}_2\text{O}$  (100 mL). The organic filtrate was concentrated *in vacuo* and the crude residue purified by silica gel flash column chromatography (ethyl acetate/hexanes) affording hemiketal **17** (162 mg, 80%) as a white foam:  $[\alpha]_{\text{D}}^{20} = +42.3^\circ$  ( $c = 0.012$  g/mL,  $\text{CH}_2\text{Cl}_2$ );  $^1\text{H}$  NMR (500 MHz,  $\text{C}_6\text{D}_6$ )  $\delta$  7.20 (d,  $J = 1.7$  Hz, 1H), 4.90 (d,  $J = 2.5$  Hz, 1H), 4.84 (dt,  $J = 2.9, 1.5$  Hz, 1H), 3.46 (s, 3H), 3.02 (d,  $J = 1.8$  Hz, 1H), 2.91 (s, 1H), 2.15 (dd,  $J = 12.7, 4.1$  Hz, 1H), 1.99 (dt,  $J = 12.0, 2.4$  Hz, 1H), 1.84 (s, 3H), 1.78 (td,  $J = 13.1, 4.2$  Hz, 1H), 1.41 – 1.11 (m, 7H), 1.05 (td,  $J = 13.3, 4.4$  Hz, 1H), 0.80 (d,  $J = 6.3$  Hz, 3H), 0.73 (s, 3H), 0.70 – 0.57 (m, 1H), 0.49 (tt,  $J = 14.6, 11.0$  Hz, 1H);  $^{13}\text{C}$  NMR (126 MHz,  $\text{C}_6\text{D}_6$ )  $\delta$  165.0, 145.4, 142.4, 135.8, 115.2, 96.9, 75.6, 53.1, 51.0, 50.8, 47.9, 42.3, 37.4, 35.7, 34.5, 29.3, 27.1, 24.1, 24.0, 22.1, 21.1; IR (thin film,  $\text{cm}^{-1}$ ) 2926, 1719, 1437, 1378, 1265, 1206; HRMS (ESI) calcd. for  $[\text{C}_{21}\text{H}_{30}\text{O}_4\text{Na}]^+$  ( $\text{M}+\text{Na}$ ) $^+$  :  $m/z$  369.2036, found 369.2040.

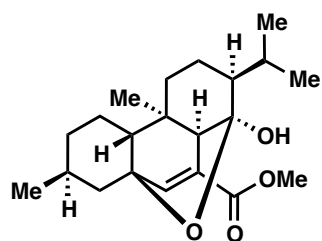

**(+)-Chatancin (1).** A solution of hemiketal **17** (100 mg, 0.29 mmol, 1 equiv) in anhydrous MeOH (6 mL) was treated with 5% Pd/C (62 mg, 0.03 mmol, 1 equiv) under an atmosphere of hydrogen (1 atm). The resulting heterogeneous mixture was stirred overnight at room temperature and then filtered through a short plug of silica gel eluting with Et<sub>2</sub>O (50 mL). The organic filtrate was concentrated *in vacuo* and the crude material purified by silica gel flash column chromatography (ethyl acetate/hexane) affording (+)-chatancin (94 mg, 93%) as a white solid:  $[\alpha]_D^{20} = +10.7^\circ$  ( $c = 0.01$  g/ml, CHCl<sub>3</sub>); <sup>1</sup>H NMR (600 MHz, C<sub>6</sub>D<sub>6</sub>)  $\delta$  7.12 (d,  $J = 1.8$  Hz, 1H), 3.43 (s, 3H), 2.93 (d,  $J = 1.8$  Hz, 1H), 2.50 (pd,  $J = 7.0, 2.5$  Hz, 1H), 1.92 - 1.79 (m, 2H), 1.49 (qd,  $J = 13.0, 4.1$  Hz, 1H), 1.41 (ddd,  $J = 12.8, 3.8, 2.6$  Hz, 1H), 1.38 - 1.22 (m, 4H), 1.22 - 1.12 (m, 3H), 1.11 (d,  $J = 6.9$  Hz, 3H), 1.03 - 0.94 (m, 4H), 0.79 (d,  $J = 6.3$  Hz, 3H), 0.67 (s, 3H), 0.58 (tdd,  $J = 12.9, 11.3, 3.4$  Hz, 1H), 0.48 - 0.33 (m, 1H); <sup>13</sup>C NMR (151 MHz, C<sub>6</sub>D<sub>6</sub>)  $\delta$  164.9, 143.4, 135.9, 98.8, 75.4, 52.8, 51.0, 48.7, 47.5, 42.2, 37.6, 35.9, 34.4, 29.2, 27.0, 25.4, 24.1, 22.9, 22.0, 18.3; IR (thin film, cm<sup>-1</sup>) 3494, 2953, 2928, 2870, 1719, 1456, 1438, 1268, 1209; HRMS (ESI) calcd. for [C<sub>21</sub>H<sub>32</sub>O<sub>4</sub>Na]<sup>+</sup> (M+Na)<sup>+</sup> :  $m/z$  371.2193, found 371.2193. Vapor diffusion of an ether solution of (±)-chatancin with pentane afforded X-ray quality crystals (m.p = 106 – 108 °C).

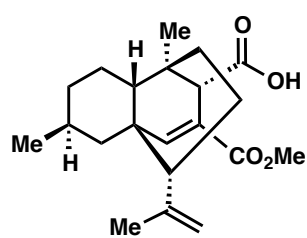

**Acid (±)-14:** To a solution of lactone (±)-**13** (59 mg, 0.17 mmol, 1 equiv) in DCM (3 mL) was added TMSOTf (62  $\mu$ L, 0.34 mmol, 2 equiv) dropwise at -78 °C. The reaction was slowly warmed to room temperature and quenched with saturated aqueous NaHCO<sub>3</sub> solution (5 mL). The organic layer was separated and the aqueous layer extracted with DCM (2 X 10 mL). The combined organic layers were washed with brine, dried over MgSO<sub>4</sub>, and concentrated *in vacuo*. Purification by silica gel flash column chromatography (ethyl acetate/hexane) gave racemic **14** (20 mg, 34%) as a colorless oil; <sup>1</sup>H NMR (600 MHz, CDCl<sub>3</sub>)  $\delta$  6.93 (dd,  $J = 2.1, 1.2$  Hz, 1H), 4.78 (t,  $J = 1.8$  Hz, 1H), 4.65 - 4.56 (m, 1H), 3.75 (s, 3H), 3.09 (d,  $J = 2.1$  Hz, 1H), 1.99 (dd,  $J = 10.5, 4.4$  Hz, 1H), 1.79 (dt,  $J = 13.3, 2.8$  Hz, 1H), 1.66 - 1.58 (m, 5H), 1.54 (qd,  $J = 13.2, 3.8$  Hz, 1H), 1.48 - 1.36 (m, 5H), 1.33 (dddq,  $J = 12.5, 9.5, 6.3, 3.0$  Hz, 1H), 1.27 - 1.22 (m, 1H), 1.15 - 1.05 (m, 4H), 0.85 (d,  $J = 6.5$  Hz, 3H), 0.79 - 0.68 (m, 1H); <sup>13</sup>C NMR (151 MHz, CDCl<sub>3</sub>)  $\delta$  178.3, 166.6, 148.3, 146.5, 130.3, 113.4, 57.7,

52.0, 49.9, 49.8, 46.3, 45.6, 42.3, 36.2, 35.2, 29.6, 26.0, 25.9, 23.5, 22.9; IR (thin film,  $\text{cm}^{-1}$ ) 2922, 1715, 1456, 1260; HRMS (ESI) calcd. for  $[\text{C}_{21}\text{H}_{30}\text{O}_4\text{Na}]^+$  ( $\text{M} + \text{Na}$ ) $^+$  :  $m/z$  369.2036, found 369.2034.

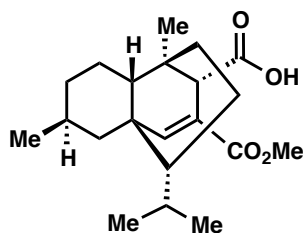

**Acid (±)-15:** A solution of acid (±)-**14** (12.4 mg, 0.036 mmol, 1 equiv) in anhydrous MeOH (2 mL) was treated with 5% Pd/C (7.6 mg, 0.0036 mmol, 10 mol%) under an atmosphere of hydrogen (balloon). The resulting heterogeneous mixture was stirred at room temperature for 8 hours and then filtered through a short plug of  $\text{SiO}_2$  eluting with  $\text{Et}_2\text{O}$  (30 mL). The organic filtrate was concentrated *in vacuo* and the crude material purified by silica gel flash column chromatography (ethyl acetate/hexane) affording racemic acid **15** (10 mg, 80%) as a white foam;  $^1\text{H}$  NMR (600 MHz,  $\text{CDCl}_3$ )  $\delta$  6.97 (d,  $J = 2.1$  Hz, 1H), 3.74 (d,  $J = 1.2$  Hz, 3H), 3.04 (d,  $J = 1.9$  Hz, 1H), 2.17 (p,  $J = 7.2$  Hz, 1H), 2.11 – 2.02 (m, 1H), 1.69 – 1.57 (m, 2H), 1.57 – 1.29 (m, 6H), 1.29 – 1.18 (m, 3H), 1.12 – 0.99 (m, 4H), 0.90 – 0.81 (m, 6H), 0.73 (qd,  $J = 12.5, 3.8$  Hz, 1H), 0.63 (d,  $J = 6.8$  Hz, 3H);  $^{13}\text{C}$  NMR (151 MHz,  $\text{CDCl}_3$ )  $\delta$  177.7, 166.7, 148.8, 129.8, 55.7, 51.9, 50.5, 49.7, 45.8, 45.7, 43.2, 36.2, 35.0, 29.8, 26.0, 25.4, 23.8, 23.6, 23.1, 18.7, 18.3; IR (thin film,  $\text{cm}^{-1}$ ) 2953, 1711, 1436, 1260; HRMS (ESI) calcd. for  $[\text{C}_{21}\text{H}_{31}\text{O}_4]^-$  ( $\text{M} - \text{H}$ ) $^-$  :  $m/z$  347.2229, found 347.2228. Vapor diffusion of an ether solution of racemic **15** with pentane afforded X-ray quality crystals (m.p. = 118 – 120  $^\circ\text{C}$ ).



## X-ray Crystal Structure Determination of (±)-12

A colorless prism 0.050 x 0.030 x 0.030 mm in size was mounted on a Cryoloop with Paratone oil. Data were collected in a nitrogen gas stream at 100(2) K using phi and omega scans. Crystal-to-detector distance was 60 mm and exposure time was 5 seconds per frame using a scan width of 2.0°. Data collection was 100.0% complete to 67.000° in  $\theta$ . A total of 40080 reflections were collected covering the indices,  $-10 \leq h \leq 11$ ,  $-17 \leq k \leq 19$ ,  $-15 \leq l \leq 14$ . 3448 reflections were found to be symmetry independent, with an  $R_{\text{int}}$  of 0.0254. Indexing and unit cell refinement indicated a primitive, monoclinic lattice. The space group was found to be P 21/n (No. 14). The data were integrated using the Bruker SAINT software program and scaled using the SADABS software program. Solution by iterative methods (SHELXT) produced a complete heavy-atom phasing model consistent with the proposed structure. All non-hydrogen atoms were refined anisotropically by full-matrix least-squares (SHELXL-2014). All hydrogen atoms were placed using a riding model. Their positions were constrained relative to their parent atom using the appropriate HFIX command in SHELXL-2014.

SI Table 1. Crystal data and structure refinement for ( $\pm$ )-12

|                                   |                                             |                                |
|-----------------------------------|---------------------------------------------|--------------------------------|
| X-ray ID                          | maimone37                                   |                                |
| Sample/notebook ID                | ZYM-889-3                                   |                                |
| Empirical formula                 | C21 H30 O4                                  |                                |
| Formula weight                    | 346.45                                      |                                |
| Temperature                       | 100(2) K                                    |                                |
| Wavelength                        | 1.54178 Å                                   |                                |
| Crystal system                    | Monoclinic                                  |                                |
| Space group                       | P 21/n                                      |                                |
| Unit cell dimensions              | a = 9.9351(3) Å                             | $\alpha = 90^\circ$ .          |
|                                   | b = 16.0173(4) Å                            | $\beta = 108.5970(10)^\circ$ . |
|                                   | c = 12.5159(3) Å                            | $\gamma = 90^\circ$ .          |
| Volume                            | 1887.70(9) Å <sup>3</sup>                   |                                |
| Z                                 | 4                                           |                                |
| Density (calculated)              | 1.219 Mg/m <sup>3</sup>                     |                                |
| Absorption coefficient            | 0.662 mm <sup>-1</sup>                      |                                |
| F(000)                            | 752                                         |                                |
| Crystal size                      | 0.050 x 0.030 x 0.030 mm <sup>3</sup>       |                                |
| Theta range for data collection   | 4.638 to 68.299°.                           |                                |
| Index ranges                      | -10 ≤ h ≤ 11, -17 ≤ k ≤ 19, -15 ≤ l ≤ 14    |                                |
| Reflections collected             | 40080                                       |                                |
| Independent reflections           | 3448 [R(int) = 0.0254]                      |                                |
| Completeness to theta = 67.000°   | 100.0 %                                     |                                |
| Absorption correction             | Semi-empirical from equivalents             |                                |
| Max. and min. transmission        | 0.929 and 0.851                             |                                |
| Refinement method                 | Full-matrix least-squares on F <sup>2</sup> |                                |
| Data / restraints / parameters    | 3448 / 0 / 231                              |                                |
| Goodness-of-fit on F <sup>2</sup> | 1.030                                       |                                |
| Final R indices [I > 2σ(I)]       | R1 = 0.0347, wR2 = 0.0880                   |                                |
| R indices (all data)              | R1 = 0.0368, wR2 = 0.0900                   |                                |
| Extinction coefficient            | n/a                                         |                                |
| Largest diff. peak and hole       | 0.286 and -0.238 e.Å <sup>-3</sup>          |                                |

Table 2. Atomic coordinates ( $\times 10^4$ ) and equivalent isotropic displacement parameters ( $\text{\AA}^2 \times 10^3$ ) for maimone37.  $U(\text{eq})$  is defined as one third of the trace of the orthogonalized  $U^{ij}$  tensor.

|       | x       | y       | z       | $U(\text{eq})$ |
|-------|---------|---------|---------|----------------|
| C(1)  | 6051(1) | 2325(1) | 4692(1) | 18(1)          |
| C(2)  | 4646(1) | 2066(1) | 3741(1) | 18(1)          |
| C(3)  | 3787(1) | 1511(1) | 4333(1) | 18(1)          |
| C(4)  | 2258(1) | 1782(1) | 4187(1) | 22(1)          |
| C(5)  | 1548(1) | 1180(1) | 4789(1) | 25(1)          |
| C(6)  | 2361(1) | 1131(1) | 6048(1) | 23(1)          |
| C(7)  | 3897(1) | 868(1)  | 6219(1) | 21(1)          |
| C(8)  | 4609(1) | 1451(1) | 5611(1) | 18(1)          |
| C(9)  | 4874(1) | 2327(1) | 6078(1) | 18(1)          |
| C(10) | 5633(1) | 2784(1) | 5591(1) | 18(1)          |
| C(11) | 6795(1) | 1533(1) | 5231(1) | 20(1)          |
| C(12) | 3870(1) | 2869(1) | 3215(1) | 21(1)          |
| C(13) | 5009(1) | 1548(1) | 2826(1) | 21(1)          |
| C(14) | 5819(1) | 2017(1) | 2148(1) | 27(1)          |
| C(15) | 6353(1) | 1435(1) | 1430(1) | 26(1)          |
| C(16) | 5812(1) | 1313(1) | 325(1)  | 23(1)          |
| C(17) | 4525(1) | 1754(1) | -431(1) | 30(1)          |
| C(18) | 6447(2) | 688(1)  | -270(1) | 34(1)          |
| C(19) | 1639(1) | 536(1)  | 6647(1) | 31(1)          |
| C(20) | 6007(1) | 3679(1) | 5794(1) | 19(1)          |
| C(21) | 5994(2) | 4865(1) | 6897(1) | 30(1)          |
| O(1)  | 6004(1) | 1074(1) | 5718(1) | 21(1)          |
| O(2)  | 7952(1) | 1297(1) | 5251(1) | 27(1)          |
| O(3)  | 6568(1) | 4077(1) | 5239(1) | 31(1)          |
| O(4)  | 5640(1) | 3993(1) | 6648(1) | 26(1)          |

Table 3. Bond lengths [Å] and angles [°] for maimone37.

|                  |            |                  |            |
|------------------|------------|------------------|------------|
| C(1)-C(10)       | 1.5096(14) | C(12)-H(12A)     | 0.9800     |
| C(1)-C(11)       | 1.5133(15) | C(12)-H(12B)     | 0.9800     |
| C(1)-C(2)        | 1.5748(14) | C(12)-H(12C)     | 0.9800     |
| C(1)-H(1)        | 1.0000     | C(13)-C(14)      | 1.5389(15) |
| C(2)-C(12)       | 1.5352(15) | C(13)-H(13A)     | 0.9900     |
| C(2)-C(13)       | 1.5458(14) | C(13)-H(13B)     | 0.9900     |
| C(2)-C(3)        | 1.5723(14) | C(14)-C(15)      | 1.5029(16) |
| C(3)-C(4)        | 1.5331(15) | C(14)-H(14A)     | 0.9900     |
| C(3)-C(8)        | 1.5491(15) | C(14)-H(14B)     | 0.9900     |
| C(3)-H(3)        | 1.0000     | C(15)-C(16)      | 1.3296(17) |
| C(4)-C(5)        | 1.5283(15) | C(15)-H(15)      | 0.9500     |
| C(4)-H(4A)       | 0.9900     | C(16)-C(18)      | 1.5021(16) |
| C(4)-H(4B)       | 0.9900     | C(16)-C(17)      | 1.5022(17) |
| C(5)-C(6)        | 1.5264(16) | C(17)-H(17A)     | 0.9800     |
| C(5)-H(5A)       | 0.9900     | C(17)-H(17B)     | 0.9800     |
| C(5)-H(5B)       | 0.9900     | C(17)-H(17C)     | 0.9800     |
| C(6)-C(19)       | 1.5250(16) | C(18)-H(18A)     | 0.9800     |
| C(6)-C(7)        | 1.5308(16) | C(18)-H(18B)     | 0.9800     |
| C(6)-H(6)        | 1.0000     | C(18)-H(18C)     | 0.9800     |
| C(7)-C(8)        | 1.5152(15) | C(19)-H(19A)     | 0.9800     |
| C(7)-H(7A)       | 0.9900     | C(19)-H(19B)     | 0.9800     |
| C(7)-H(7B)       | 0.9900     | C(19)-H(19C)     | 0.9800     |
| C(8)-O(1)        | 1.4784(12) | C(20)-O(3)       | 1.2022(14) |
| C(8)-C(9)        | 1.5109(15) | C(20)-O(4)       | 1.3330(13) |
| C(9)-C(10)       | 1.3294(15) | C(21)-O(4)       | 1.4485(14) |
| C(9)-H(9)        | 0.9500     | C(21)-H(21A)     | 0.9800     |
| C(10)-C(20)      | 1.4835(15) | C(21)-H(21B)     | 0.9800     |
| C(11)-O(2)       | 1.2032(14) | C(21)-H(21C)     | 0.9800     |
| C(11)-O(1)       | 1.3539(14) |                  |            |
| C(10)-C(1)-C(11) | 106.66(9)  | C(11)-C(1)-H(1)  | 111.5      |
| C(10)-C(1)-C(2)  | 107.66(8)  | C(2)-C(1)-H(1)   | 111.5      |
| C(11)-C(1)-C(2)  | 107.78(9)  | C(12)-C(2)-C(13) | 109.60(9)  |
| C(10)-C(1)-H(1)  | 111.5      | C(12)-C(2)-C(3)  | 113.68(9)  |

|                  |            |                     |            |
|------------------|------------|---------------------|------------|
| C(13)-C(2)-C(3)  | 109.67(8)  | C(9)-C(8)-C(7)      | 115.47(9)  |
| C(12)-C(2)-C(1)  | 107.82(9)  | O(1)-C(8)-C(3)      | 106.82(8)  |
| C(13)-C(2)-C(1)  | 109.94(9)  | C(9)-C(8)-C(3)      | 108.11(8)  |
| C(3)-C(2)-C(1)   | 106.03(8)  | C(7)-C(8)-C(3)      | 112.35(9)  |
| C(4)-C(3)-C(8)   | 108.51(9)  | C(10)-C(9)-C(8)     | 112.88(9)  |
| C(4)-C(3)-C(2)   | 116.70(9)  | C(10)-C(9)-H(9)     | 123.6      |
| C(8)-C(3)-C(2)   | 109.60(8)  | C(8)-C(9)-H(9)      | 123.6      |
| C(4)-C(3)-H(3)   | 107.2      | C(9)-C(10)-C(20)    | 127.00(10) |
| C(8)-C(3)-H(3)   | 107.2      | C(9)-C(10)-C(1)     | 113.87(10) |
| C(2)-C(3)-H(3)   | 107.2      | C(20)-C(10)-C(1)    | 119.02(9)  |
| C(5)-C(4)-C(3)   | 110.96(9)  | O(2)-C(11)-O(1)     | 120.50(10) |
| C(5)-C(4)-H(4A)  | 109.4      | O(2)-C(11)-C(1)     | 126.86(10) |
| C(3)-C(4)-H(4A)  | 109.4      | O(1)-C(11)-C(1)     | 112.64(9)  |
| C(5)-C(4)-H(4B)  | 109.4      | C(2)-C(12)-H(12A)   | 109.5      |
| C(3)-C(4)-H(4B)  | 109.4      | C(2)-C(12)-H(12B)   | 109.5      |
| H(4A)-C(4)-H(4B) | 108.0      | H(12A)-C(12)-H(12B) | 109.5      |
| C(6)-C(5)-C(4)   | 111.53(9)  | C(2)-C(12)-H(12C)   | 109.5      |
| C(6)-C(5)-H(5A)  | 109.3      | H(12A)-C(12)-H(12C) | 109.5      |
| C(4)-C(5)-H(5A)  | 109.3      | H(12B)-C(12)-H(12C) | 109.5      |
| C(6)-C(5)-H(5B)  | 109.3      | C(14)-C(13)-C(2)    | 115.74(9)  |
| C(4)-C(5)-H(5B)  | 109.3      | C(14)-C(13)-H(13A)  | 108.3      |
| H(5A)-C(5)-H(5B) | 108.0      | C(2)-C(13)-H(13A)   | 108.3      |
| C(19)-C(6)-C(5)  | 111.31(10) | C(14)-C(13)-H(13B)  | 108.3      |
| C(19)-C(6)-C(7)  | 111.28(10) | C(2)-C(13)-H(13B)   | 108.3      |
| C(5)-C(6)-C(7)   | 109.53(9)  | H(13A)-C(13)-H(13B) | 107.4      |
| C(19)-C(6)-H(6)  | 108.2      | C(15)-C(14)-C(13)   | 111.96(10) |
| C(5)-C(6)-H(6)   | 108.2      | C(15)-C(14)-H(14A)  | 109.2      |
| C(7)-C(6)-H(6)   | 108.2      | C(13)-C(14)-H(14A)  | 109.2      |
| C(8)-C(7)-C(6)   | 111.38(9)  | C(15)-C(14)-H(14B)  | 109.2      |
| C(8)-C(7)-H(7A)  | 109.4      | C(13)-C(14)-H(14B)  | 109.2      |
| C(6)-C(7)-H(7A)  | 109.4      | H(14A)-C(14)-H(14B) | 107.9      |
| C(8)-C(7)-H(7B)  | 109.4      | C(16)-C(15)-C(14)   | 127.58(11) |
| C(6)-C(7)-H(7B)  | 109.4      | C(16)-C(15)-H(15)   | 116.2      |
| H(7A)-C(7)-H(7B) | 108.0      | C(14)-C(15)-H(15)   | 116.2      |
| O(1)-C(8)-C(9)   | 107.50(8)  | C(15)-C(16)-C(18)   | 121.27(12) |
| O(1)-C(8)-C(7)   | 106.14(8)  | C(15)-C(16)-C(17)   | 124.51(11) |

|                     |            |
|---------------------|------------|
| C(18)-C(16)-C(17)   | 114.21(11) |
| C(16)-C(17)-H(17A)  | 109.5      |
| C(16)-C(17)-H(17B)  | 109.5      |
| H(17A)-C(17)-H(17B) | 109.5      |
| C(16)-C(17)-H(17C)  | 109.5      |
| H(17A)-C(17)-H(17C) | 109.5      |
| H(17B)-C(17)-H(17C) | 109.5      |
| C(16)-C(18)-H(18A)  | 109.5      |
| C(16)-C(18)-H(18B)  | 109.5      |
| H(18A)-C(18)-H(18B) | 109.5      |
| C(16)-C(18)-H(18C)  | 109.5      |
| H(18A)-C(18)-H(18C) | 109.5      |
| H(18B)-C(18)-H(18C) | 109.5      |
| C(6)-C(19)-H(19A)   | 109.5      |
| C(6)-C(19)-H(19B)   | 109.5      |
| H(19A)-C(19)-H(19B) | 109.5      |
| C(6)-C(19)-H(19C)   | 109.5      |
| H(19A)-C(19)-H(19C) | 109.5      |
| H(19B)-C(19)-H(19C) | 109.5      |
| O(3)-C(20)-O(4)     | 124.03(10) |
| O(3)-C(20)-C(10)    | 123.39(10) |
| O(4)-C(20)-C(10)    | 112.57(9)  |
| O(4)-C(21)-H(21A)   | 109.5      |
| O(4)-C(21)-H(21B)   | 109.5      |
| H(21A)-C(21)-H(21B) | 109.5      |
| O(4)-C(21)-H(21C)   | 109.5      |
| H(21A)-C(21)-H(21C) | 109.5      |
| H(21B)-C(21)-H(21C) | 109.5      |
| C(11)-O(1)-C(8)     | 113.55(8)  |
| C(20)-O(4)-C(21)    | 115.18(9)  |

---

Symmetry transformations used to generate equivalent atoms:

Table 4. Anisotropic displacement parameters ( $\text{\AA}^2 \times 10^3$ ) for maimone37. The anisotropic displacement factor exponent takes the form:  $-2\pi^2 [ h^2 a^{*2} U^{11} + \dots + 2 h k a^* b^* U^{12} ]$

|       | U <sup>11</sup> | U <sup>22</sup> | U <sup>33</sup> | U <sup>23</sup> | U <sup>13</sup> | U <sup>12</sup> |
|-------|-----------------|-----------------|-----------------|-----------------|-----------------|-----------------|
| C(1)  | 17(1)           | 18(1)           | 20(1)           | -2(1)           | 7(1)            | -1(1)           |
| C(2)  | 19(1)           | 17(1)           | 19(1)           | -1(1)           | 6(1)            | -1(1)           |
| C(3)  | 19(1)           | 17(1)           | 19(1)           | -2(1)           | 6(1)            | -2(1)           |
| C(4)  | 17(1)           | 25(1)           | 22(1)           | 1(1)            | 4(1)            | -1(1)           |
| C(5)  | 19(1)           | 26(1)           | 31(1)           | -1(1)           | 9(1)            | -3(1)           |
| C(6)  | 26(1)           | 20(1)           | 27(1)           | -1(1)           | 14(1)           | -3(1)           |
| C(7)  | 25(1)           | 18(1)           | 22(1)           | 2(1)            | 8(1)            | -1(1)           |
| C(8)  | 16(1)           | 18(1)           | 20(1)           | 0(1)            | 5(1)            | 2(1)            |
| C(9)  | 16(1)           | 19(1)           | 16(1)           | 0(1)            | 3(1)            | 1(1)            |
| C(10) | 15(1)           | 19(1)           | 17(1)           | -1(1)           | 2(1)            | 1(1)            |
| C(11) | 18(1)           | 20(1)           | 21(1)           | -4(1)           | 5(1)            | -1(1)           |
| C(12) | 22(1)           | 21(1)           | 20(1)           | 1(1)            | 6(1)            | 0(1)            |
| C(13) | 25(1)           | 19(1)           | 20(1)           | -1(1)           | 9(1)            | -2(1)           |
| C(14) | 38(1)           | 24(1)           | 25(1)           | -2(1)           | 17(1)           | -5(1)           |
| C(15) | 29(1)           | 23(1)           | 30(1)           | 3(1)            | 15(1)           | 2(1)            |
| C(16) | 25(1)           | 19(1)           | 30(1)           | -2(1)           | 17(1)           | -2(1)           |
| C(17) | 26(1)           | 33(1)           | 33(1)           | -5(1)           | 11(1)           | -2(1)           |
| C(18) | 42(1)           | 27(1)           | 41(1)           | -5(1)           | 27(1)           | 0(1)            |
| C(19) | 32(1)           | 30(1)           | 37(1)           | 3(1)            | 18(1)           | -5(1)           |
| C(20) | 16(1)           | 20(1)           | 19(1)           | 0(1)            | 4(1)            | 1(1)            |
| C(21) | 46(1)           | 16(1)           | 30(1)           | -4(1)           | 16(1)           | -1(1)           |
| O(1)  | 18(1)           | 18(1)           | 25(1)           | 2(1)            | 6(1)            | 3(1)            |
| O(2)  | 19(1)           | 28(1)           | 35(1)           | 0(1)            | 10(1)           | 4(1)            |
| O(3)  | 41(1)           | 22(1)           | 38(1)           | -5(1)           | 23(1)           | -9(1)           |
| O(4)  | 39(1)           | 16(1)           | 25(1)           | -2(1)           | 16(1)           | -1(1)           |



Table 5. Hydrogen coordinates ( $\times 10^4$ ) and isotropic displacement parameters ( $\text{\AA}^2 \times 10^3$ ) for maimone37.

|        | x    | y    | z     | U(eq) |
|--------|------|------|-------|-------|
| H(1)   | 6676 | 2675 | 4385  | 22    |
| H(3)   | 3741 | 935  | 4015  | 22    |
| H(4A)  | 2263 | 2351 | 4496  | 26    |
| H(4B)  | 1707 | 1799 | 3374  | 26    |
| H(5A)  | 564  | 1369 | 4681  | 30    |
| H(5B)  | 1499 | 618  | 4452  | 30    |
| H(6)   | 2373 | 1700 | 6379  | 28    |
| H(7A)  | 4436 | 869  | 7035  | 26    |
| H(7B)  | 3908 | 292  | 5934  | 26    |
| H(9)   | 4535 | 2530 | 6658  | 21    |
| H(12A) | 4503 | 3214 | 2938  | 32    |
| H(12B) | 3591 | 3179 | 3786  | 32    |
| H(12C) | 3021 | 2725 | 2586  | 32    |
| H(13A) | 5584 | 1061 | 3194  | 25    |
| H(13B) | 4112 | 1332 | 2292  | 25    |
| H(14A) | 5183 | 2437 | 1658  | 33    |
| H(14B) | 6634 | 2316 | 2674  | 33    |
| H(15)  | 7173 | 1117 | 1812  | 31    |
| H(17A) | 3728 | 1362 | -670  | 45    |
| H(17B) | 4731 | 1970 | -1094 | 45    |
| H(17C) | 4276 | 2219 | -20   | 45    |
| H(18A) | 7284 | 432  | 273   | 50    |
| H(18B) | 6728 | 969  | -861  | 50    |
| H(18C) | 5745 | 254  | -609  | 50    |
| H(19A) | 661  | 719  | 6525  | 47    |
| H(19B) | 2161 | 534  | 7457  | 47    |
| H(19C) | 1634 | -29  | 6345  | 47    |
| H(21A) | 7007 | 4950 | 7013  | 45    |
| H(21B) | 5779 | 5024 | 7581  | 45    |
| H(21C) | 5433 | 5209 | 6264  | 45    |

### **X-ray Crystal Structure Determination of (±)-15**

A colorless prism 0.060 x 0.040 x 0.030 mm in size was mounted on a Cryoloop with Paratone oil. Data were collected in a nitrogen gas stream at 100(2) K using phi and omega scans. Crystal-to-detector distance was 60 mm and exposure time was 5 seconds per frame using a scan width of 2.0°. Data collection was 98.6% complete to 67.000° in  $\theta$ . A total of 35829 reflections were collected covering the indices,  $-8 \leq h \leq 8$ ,  $-10 \leq k \leq 11$ ,  $-18 \leq l \leq 18$ . 3359 reflections were found to be symmetry independent, with an  $R_{\text{int}}$  of 0.0342. Indexing and unit cell refinement indicated a primitive, triclinic lattice. The space group was found to be P -1 (No. 2). The data were integrated using the Bruker SAINT software program and scaled using the SADABS software program. Solution by iterative methods (SHELXT) produced a complete heavy-atom phasing model consistent with the proposed structure. All non-hydrogen atoms were refined anisotropically by full-matrix least-squares (SHELXL-2014). All hydrogen atoms were placed using a riding model. Their positions were constrained relative to their parent atom using the appropriate HFIX command in SHELXL-2014.

SI Table 2. Crystal data and structure refinement for ( $\pm$ )-15

|                                   |                                             |                               |
|-----------------------------------|---------------------------------------------|-------------------------------|
| X-ray ID                          | maimone36                                   |                               |
| Sample/notebook ID                | ZYM-931                                     |                               |
| Empirical formula                 | C21 H32 O4                                  |                               |
| Formula weight                    | 348.46                                      |                               |
| Temperature                       | 100(2) K                                    |                               |
| Wavelength                        | 1.54178 Å                                   |                               |
| Crystal system                    | Triclinic                                   |                               |
| Space group                       | P -1                                        |                               |
| Unit cell dimensions              | a = 7.2615(3) Å                             | $\alpha = 93.392(2)^\circ$ .  |
|                                   | b = 9.1617(3) Å                             | $\beta = 102.492(2)^\circ$ .  |
|                                   | c = 15.4037(6) Å                            | $\gamma = 109.220(2)^\circ$ . |
| Volume                            | 935.25(6) Å <sup>3</sup>                    |                               |
| Z                                 | 2                                           |                               |
| Density (calculated)              | 1.237 Mg/m <sup>3</sup>                     |                               |
| Absorption coefficient            | 0.668 mm <sup>-1</sup>                      |                               |
| F(000)                            | 380                                         |                               |
| Crystal size                      | 0.060 x 0.040 x 0.030 mm <sup>3</sup>       |                               |
| Theta range for data collection   | 2.968 to 68.263°.                           |                               |
| Index ranges                      | -8 ≤ h ≤ 8, -10 ≤ k ≤ 11, -18 ≤ l ≤ 18      |                               |
| Reflections collected             | 35829                                       |                               |
| Independent reflections           | 3359 [R(int) = 0.0342]                      |                               |
| Completeness to theta = 67.000°   | 98.6 %                                      |                               |
| Absorption correction             | Semi-empirical from equivalents             |                               |
| Max. and min. transmission        | 0.929 and 0.870                             |                               |
| Refinement method                 | Full-matrix least-squares on F <sup>2</sup> |                               |
| Data / restraints / parameters    | 3359 / 0 / 232                              |                               |
| Goodness-of-fit on F <sup>2</sup> | 1.063                                       |                               |
| Final R indices [I > 2σ(I)]       | R1 = 0.0410, wR2 = 0.1140                   |                               |
| R indices (all data)              | R1 = 0.0464, wR2 = 0.1190                   |                               |
| Extinction coefficient            | n/a                                         |                               |
| Largest diff. peak and hole       | 0.396 and -0.220 e.Å <sup>-3</sup>          |                               |

Table 2. Atomic coordinates ( $\times 10^4$ ) and equivalent isotropic displacement parameters ( $\text{\AA}^2 \times 10^3$ ) for maimone36.  $U(\text{eq})$  is defined as one third of the trace of the orthogonalized  $U^{ij}$  tensor.

|       | x        | y        | z       | $U(\text{eq})$ |
|-------|----------|----------|---------|----------------|
| C(1)  | 164(2)   | 6224(2)  | 3115(1) | 24(1)          |
| C(2)  | -1227(2) | 6425(2)  | 2265(1) | 25(1)          |
| C(3)  | -613(2)  | 8108(2)  | 2085(1) | 25(1)          |
| C(4)  | 1589(2)  | 8790(2)  | 2026(1) | 20(1)          |
| C(5)  | 2917(2)  | 8697(2)  | 2937(1) | 19(1)          |
| C(6)  | 5178(2)  | 9547(2)  | 3047(1) | 22(1)          |
| C(7)  | 6424(2)  | 9474(2)  | 3964(1) | 28(1)          |
| C(8)  | 6055(2)  | 7788(2)  | 4133(1) | 27(1)          |
| C(9)  | 3801(2)  | 6919(2)  | 4014(1) | 25(1)          |
| C(10) | 2449(2)  | 6974(2)  | 3102(1) | 20(1)          |
| C(11) | 2828(2)  | 6105(2)  | 2344(1) | 19(1)          |
| C(12) | 2549(2)  | 6450(2)  | 1509(1) | 18(1)          |
| C(13) | 1873(2)  | 7787(2)  | 1226(1) | 19(1)          |
| C(14) | -517(3)  | 4521(2)  | 3312(1) | 30(1)          |
| C(15) | -1089(3) | 3269(2)  | 2501(1) | 43(1)          |
| C(16) | -2207(4) | 4188(2)  | 3776(2) | 50(1)          |
| C(17) | 1994(2)  | 10491(2) | 1866(1) | 25(1)          |
| C(18) | 7241(3)  | 7714(2)  | 5071(1) | 38(1)          |
| C(19) | 2685(2)  | 5430(2)  | 759(1)  | 20(1)          |
| C(20) | 3439(2)  | 3189(2)  | 362(1)  | 24(1)          |
| C(21) | 3271(2)  | 8751(2)  | 694(1)  | 19(1)          |
| O(1)  | 2197(2)  | 5584(1)  | -22(1)  | 23(1)          |
| O(2)  | 3399(2)  | 4318(1)  | 1045(1) | 24(1)          |
| O(3)  | 5089(2)  | 9060(1)  | 882(1)  | 22(1)          |
| O(4)  | 2299(2)  | 9225(1)  | 4(1)    | 22(1)          |

Table 3. Bond lengths [Å] and angles [°] for maimone36.

|                  |            |                 |            |
|------------------|------------|-----------------|------------|
| C(1)-C(2)        | 1.531(2)   | C(11)-H(11)     | 0.9500     |
| C(1)-C(14)       | 1.544(2)   | C(12)-C(19)     | 1.484(2)   |
| C(1)-C(10)       | 1.579(2)   | C(12)-C(13)     | 1.516(2)   |
| C(1)-H(1)        | 1.0000     | C(13)-C(21)     | 1.5291(19) |
| C(2)-C(3)        | 1.518(2)   | C(13)-H(13)     | 1.0000     |
| C(2)-H(2A)       | 0.9900     | C(14)-C(16)     | 1.506(3)   |
| C(2)-H(2B)       | 0.9900     | C(14)-C(15)     | 1.530(2)   |
| C(3)-C(4)        | 1.539(2)   | C(14)-H(14)     | 1.0000     |
| C(3)-H(3A)       | 0.9900     | C(15)-H(15A)    | 0.9800     |
| C(3)-H(3B)       | 0.9900     | C(15)-H(15B)    | 0.9800     |
| C(4)-C(17)       | 1.533(2)   | C(15)-H(15C)    | 0.9800     |
| C(4)-C(5)        | 1.545(2)   | C(16)-H(16A)    | 0.9800     |
| C(4)-C(13)       | 1.583(2)   | C(16)-H(16B)    | 0.9800     |
| C(5)-C(6)        | 1.534(2)   | C(16)-H(16C)    | 0.9800     |
| C(5)-C(10)       | 1.5500(19) | C(17)-H(17A)    | 0.9800     |
| C(5)-H(5)        | 1.0000     | C(17)-H(17B)    | 0.9800     |
| C(6)-C(7)        | 1.523(2)   | C(17)-H(17C)    | 0.9800     |
| C(6)-H(6A)       | 0.9900     | C(18)-H(18A)    | 0.9800     |
| C(6)-H(6B)       | 0.9900     | C(18)-H(18B)    | 0.9800     |
| C(7)-C(8)        | 1.526(2)   | C(18)-H(18C)    | 0.9800     |
| C(7)-H(7A)       | 0.9900     | C(19)-O(1)      | 1.2087(18) |
| C(7)-H(7B)       | 0.9900     | C(19)-O(2)      | 1.3429(18) |
| C(8)-C(9)        | 1.530(2)   | C(20)-O(2)      | 1.4435(18) |
| C(8)-C(18)       | 1.532(2)   | C(20)-H(20A)    | 0.9800     |
| C(8)-H(8)        | 1.0000     | C(20)-H(20B)    | 0.9800     |
| C(9)-C(10)       | 1.544(2)   | C(20)-H(20C)    | 0.9800     |
| C(9)-H(9A)       | 0.9900     | C(21)-O(3)      | 1.2191(17) |
| C(9)-H(9B)       | 0.9900     | C(21)-O(4)      | 1.3219(17) |
| C(10)-C(11)      | 1.498(2)   | O(4)-H(4)       | 0.8400     |
| C(11)-C(12)      | 1.331(2)   |                 |            |
| C(2)-C(1)-C(14)  | 111.66(13) | C(2)-C(1)-H(1)  | 105.8      |
| C(2)-C(1)-C(10)  | 111.27(12) | C(14)-C(1)-H(1) | 105.8      |
| C(14)-C(1)-C(10) | 115.79(13) | C(10)-C(1)-H(1) | 105.8      |

|                  |            |                   |            |
|------------------|------------|-------------------|------------|
| C(3)-C(2)-C(1)   | 112.00(12) | C(7)-C(8)-C(9)    | 109.91(13) |
| C(3)-C(2)-H(2A)  | 109.2      | C(7)-C(8)-C(18)   | 111.33(13) |
| C(1)-C(2)-H(2A)  | 109.2      | C(9)-C(8)-C(18)   | 110.44(14) |
| C(3)-C(2)-H(2B)  | 109.2      | C(7)-C(8)-H(8)    | 108.4      |
| C(1)-C(2)-H(2B)  | 109.2      | C(9)-C(8)-H(8)    | 108.4      |
| H(2A)-C(2)-H(2B) | 107.9      | C(18)-C(8)-H(8)   | 108.4      |
| C(2)-C(3)-C(4)   | 113.21(13) | C(8)-C(9)-C(10)   | 114.83(12) |
| C(2)-C(3)-H(3A)  | 108.9      | C(8)-C(9)-H(9A)   | 108.6      |
| C(4)-C(3)-H(3A)  | 108.9      | C(10)-C(9)-H(9A)  | 108.6      |
| C(2)-C(3)-H(3B)  | 108.9      | C(8)-C(9)-H(9B)   | 108.6      |
| C(4)-C(3)-H(3B)  | 108.9      | C(10)-C(9)-H(9B)  | 108.6      |
| H(3A)-C(3)-H(3B) | 107.7      | H(9A)-C(9)-H(9B)  | 107.5      |
| C(17)-C(4)-C(3)  | 107.08(12) | C(11)-C(10)-C(9)  | 111.30(12) |
| C(17)-C(4)-C(5)  | 111.01(12) | C(11)-C(10)-C(5)  | 108.12(11) |
| C(3)-C(4)-C(5)   | 106.81(11) | C(9)-C(10)-C(5)   | 109.26(11) |
| C(17)-C(4)-C(13) | 111.64(11) | C(11)-C(10)-C(1)  | 109.03(11) |
| C(3)-C(4)-C(13)  | 108.70(11) | C(9)-C(10)-C(1)   | 109.54(12) |
| C(5)-C(4)-C(13)  | 111.36(12) | C(5)-C(10)-C(1)   | 109.56(12) |
| C(6)-C(5)-C(4)   | 113.74(11) | C(12)-C(11)-C(10) | 123.41(14) |
| C(6)-C(5)-C(10)  | 111.66(12) | C(12)-C(11)-H(11) | 118.3      |
| C(4)-C(5)-C(10)  | 110.48(11) | C(10)-C(11)-H(11) | 118.3      |
| C(6)-C(5)-H(5)   | 106.8      | C(11)-C(12)-C(19) | 121.30(13) |
| C(4)-C(5)-H(5)   | 106.8      | C(11)-C(12)-C(13) | 123.93(13) |
| C(10)-C(5)-H(5)  | 106.8      | C(19)-C(12)-C(13) | 114.49(12) |
| C(7)-C(6)-C(5)   | 112.06(12) | C(12)-C(13)-C(21) | 109.32(12) |
| C(7)-C(6)-H(6A)  | 109.2      | C(12)-C(13)-C(4)  | 113.72(11) |
| C(5)-C(6)-H(6A)  | 109.2      | C(21)-C(13)-C(4)  | 113.93(11) |
| C(7)-C(6)-H(6B)  | 109.2      | C(12)-C(13)-H(13) | 106.4      |
| C(5)-C(6)-H(6B)  | 109.2      | C(21)-C(13)-H(13) | 106.4      |
| H(6A)-C(6)-H(6B) | 107.9      | C(4)-C(13)-H(13)  | 106.4      |
| C(6)-C(7)-C(8)   | 111.30(12) | C(16)-C(14)-C(15) | 109.77(14) |
| C(6)-C(7)-H(7A)  | 109.4      | C(16)-C(14)-C(1)  | 111.40(15) |
| C(8)-C(7)-H(7A)  | 109.4      | C(15)-C(14)-C(1)  | 115.39(14) |
| C(6)-C(7)-H(7B)  | 109.4      | C(16)-C(14)-H(14) | 106.6      |
| C(8)-C(7)-H(7B)  | 109.4      | C(15)-C(14)-H(14) | 106.6      |
| H(7A)-C(7)-H(7B) | 108.0      | C(1)-C(14)-H(14)  | 106.6      |

|                     |            |                  |            |
|---------------------|------------|------------------|------------|
| C(14)-C(15)-H(15A)  | 109.5      | C(19)-O(2)-C(20) | 116.67(11) |
| C(14)-C(15)-H(15B)  | 109.5      | C(21)-O(4)-H(4)  | 109.5      |
| H(15A)-C(15)-H(15B) | 109.5      |                  |            |
| C(14)-C(15)-H(15C)  | 109.5      |                  |            |
| H(15A)-C(15)-H(15C) | 109.5      |                  |            |
| H(15B)-C(15)-H(15C) | 109.5      |                  |            |
| C(14)-C(16)-H(16A)  | 109.5      |                  |            |
| C(14)-C(16)-H(16B)  | 109.5      |                  |            |
| H(16A)-C(16)-H(16B) | 109.5      |                  |            |
| C(14)-C(16)-H(16C)  | 109.5      |                  |            |
| H(16A)-C(16)-H(16C) | 109.5      |                  |            |
| H(16B)-C(16)-H(16C) | 109.5      |                  |            |
| C(4)-C(17)-H(17A)   | 109.5      |                  |            |
| C(4)-C(17)-H(17B)   | 109.5      |                  |            |
| H(17A)-C(17)-H(17B) | 109.5      |                  |            |
| C(4)-C(17)-H(17C)   | 109.5      |                  |            |
| H(17A)-C(17)-H(17C) | 109.5      |                  |            |
| H(17B)-C(17)-H(17C) | 109.5      |                  |            |
| C(8)-C(18)-H(18A)   | 109.5      |                  |            |
| C(8)-C(18)-H(18B)   | 109.5      |                  |            |
| H(18A)-C(18)-H(18B) | 109.5      |                  |            |
| C(8)-C(18)-H(18C)   | 109.5      |                  |            |
| H(18A)-C(18)-H(18C) | 109.5      |                  |            |
| H(18B)-C(18)-H(18C) | 109.5      |                  |            |
| O(1)-C(19)-O(2)     | 124.06(14) |                  |            |
| O(1)-C(19)-C(12)    | 123.48(13) |                  |            |
| O(2)-C(19)-C(12)    | 112.45(12) |                  |            |
| O(2)-C(20)-H(20A)   | 109.5      |                  |            |
| O(2)-C(20)-H(20B)   | 109.5      |                  |            |
| H(20A)-C(20)-H(20B) | 109.5      |                  |            |
| O(2)-C(20)-H(20C)   | 109.5      |                  |            |
| H(20A)-C(20)-H(20C) | 109.5      |                  |            |
| H(20B)-C(20)-H(20C) | 109.5      |                  |            |
| O(3)-C(21)-O(4)     | 123.14(13) |                  |            |
| O(3)-C(21)-C(13)    | 124.03(13) |                  |            |
| O(4)-C(21)-C(13)    | 112.82(12) |                  |            |

---

Symmetry transformations used to generate equivalent atoms:



Table 4. Anisotropic displacement parameters ( $\text{\AA}^2 \times 10^3$ ) for maimone36. The anisotropic displacement factor exponent takes the form:  $-2\pi^2 [ h^2 a^{*2} U^{11} + \dots + 2 h k a^* b^* U^{12} ]$

|       | U <sup>11</sup> | U <sup>22</sup> | U <sup>33</sup> | U <sup>23</sup> | U <sup>13</sup> | U <sup>12</sup> |
|-------|-----------------|-----------------|-----------------|-----------------|-----------------|-----------------|
| C(1)  | 24(1)           | 23(1)           | 24(1)           | 3(1)            | 9(1)            | 2(1)            |
| C(2)  | 17(1)           | 30(1)           | 25(1)           | 3(1)            | 7(1)            | 3(1)            |
| C(3)  | 22(1)           | 32(1)           | 23(1)           | 4(1)            | 7(1)            | 11(1)           |
| C(4)  | 21(1)           | 20(1)           | 20(1)           | 5(1)            | 6(1)            | 8(1)            |
| C(5)  | 21(1)           | 17(1)           | 18(1)           | 2(1)            | 5(1)            | 4(1)            |
| C(6)  | 22(1)           | 17(1)           | 24(1)           | 4(1)            | 4(1)            | 2(1)            |
| C(7)  | 24(1)           | 24(1)           | 26(1)           | 1(1)            | 0(1)            | 1(1)            |
| C(8)  | 28(1)           | 25(1)           | 24(1)           | 3(1)            | -1(1)           | 7(1)            |
| C(9)  | 30(1)           | 20(1)           | 20(1)           | 5(1)            | 3(1)            | 5(1)            |
| C(10) | 20(1)           | 17(1)           | 19(1)           | 4(1)            | 4(1)            | 2(1)            |
| C(11) | 17(1)           | 15(1)           | 24(1)           | 5(1)            | 4(1)            | 3(1)            |
| C(12) | 15(1)           | 15(1)           | 22(1)           | 3(1)            | 5(1)            | 2(1)            |
| C(13) | 18(1)           | 19(1)           | 18(1)           | 4(1)            | 4(1)            | 6(1)            |
| C(14) | 28(1)           | 23(1)           | 34(1)           | 7(1)            | 9(1)            | 2(1)            |
| C(15) | 51(1)           | 22(1)           | 56(1)           | 3(1)            | 31(1)           | 2(1)            |
| C(16) | 69(1)           | 30(1)           | 52(1)           | 7(1)            | 39(1)           | 4(1)            |
| C(17) | 33(1)           | 24(1)           | 24(1)           | 6(1)            | 8(1)            | 15(1)           |
| C(18) | 37(1)           | 35(1)           | 32(1)           | 5(1)            | -6(1)           | 10(1)           |
| C(19) | 15(1)           | 18(1)           | 23(1)           | 4(1)            | 5(1)            | 2(1)            |
| C(20) | 27(1)           | 21(1)           | 26(1)           | 3(1)            | 8(1)            | 11(1)           |
| C(21) | 22(1)           | 16(1)           | 19(1)           | 3(1)            | 5(1)            | 7(1)            |
| O(1)  | 24(1)           | 26(1)           | 20(1)           | 5(1)            | 6(1)            | 9(1)            |
| O(2)  | 31(1)           | 21(1)           | 24(1)           | 4(1)            | 7(1)            | 13(1)           |
| O(3)  | 19(1)           | 24(1)           | 24(1)           | 9(1)            | 6(1)            | 7(1)            |
| O(4)  | 21(1)           | 26(1)           | 22(1)           | 11(1)           | 7(1)            | 10(1)           |

Table 5. Hydrogen coordinates ( $\times 10^4$ ) and isotropic displacement parameters ( $\text{\AA}^2 \times 10^3$ ) for maimone36.

|        | x     | y     | z    | U(eq) |
|--------|-------|-------|------|-------|
| H(1)   | -12   | 6855  | 3622 | 29    |
| H(2A)  | -1195 | 5754  | 1745 | 30    |
| H(2B)  | -2626 | 6078  | 2332 | 30    |
| H(3A)  | -808  | 8754  | 2572 | 30    |
| H(3B)  | -1507 | 8168  | 1514 | 30    |
| H(5)   | 2523  | 9229  | 3414 | 23    |
| H(6A)  | 5617  | 9070  | 2573 | 27    |
| H(6B)  | 5422  | 10654 | 2966 | 27    |
| H(7A)  | 6071  | 10032 | 4436 | 33    |
| H(7B)  | 7872  | 10005 | 3998 | 33    |
| H(8)   | 6517  | 7265  | 3678 | 33    |
| H(9A)  | 3367  | 7370  | 4499 | 30    |
| H(9B)  | 3586  | 5813  | 4086 | 30    |
| H(11)  | 3292  | 5264  | 2466 | 23    |
| H(13)  | 515   | 7303  | 797  | 22    |
| H(14)  | 655   | 4410  | 3746 | 36    |
| H(15A) | -1286 | 2248  | 2704 | 65    |
| H(15B) | -7    | 3514  | 2188 | 65    |
| H(15C) | -2339 | 3245  | 2091 | 65    |
| H(16A) | -3398 | 4275  | 3371 | 75    |
| H(16B) | -1792 | 4944  | 4321 | 75    |
| H(16C) | -2530 | 3130  | 3936 | 75    |
| H(17A) | 1021  | 10526 | 1324 | 38    |
| H(17B) | 3363  | 10947 | 1789 | 38    |
| H(17C) | 1857  | 11086 | 2383 | 38    |
| H(18A) | 8685  | 8241  | 5128 | 57    |
| H(18B) | 6980  | 6620  | 5158 | 57    |
| H(18C) | 6819  | 8234  | 5525 | 57    |
| H(20A) | 2170  | 2297  | 219  | 36    |
| H(20B) | 4564  | 2830  | 582  | 36    |

|        |      |      |      |    |
|--------|------|------|------|----|
| H(20C) | 3610 | 3672 | -180 | 36 |
| H(4)   | 3117 | 9717 | -280 | 34 |

---

## X-ray Crystal Structure Determination of ( $\pm$ )-1

A colorless plate 0.050 x 0.040 x 0.020 mm in size was mounted on a Cryoloop with Paratone oil. Data were collected in a nitrogen gas stream at 100(2) K using phi and omega scans. Crystal-to-detector distance was 60 mm and exposure time was 5 seconds per frame using a scan width of 2.0°. Data collection was 99.6% complete to 67.000° in  $\theta$ . A total of 56859 reflections were collected covering the indices,  $-13 \leq h \leq 13$ ,  $-19 \leq k \leq 19$ ,  $-12 \leq l \leq 10$ . 3415 reflections were found to be symmetry independent, with an  $R_{\text{int}}$  of 0.0324. Indexing and unit cell refinement indicated a primitive, monoclinic lattice. The space group was found to be P 21/c (No. 14). The data were integrated using the Bruker SAINT software program and scaled using the SADABS software program. Solution by iterative methods (SHELXT) produced a complete heavy-atom phasing model consistent with the proposed structure. All non-hydrogen atoms were refined anisotropically by full-matrix least-squares (SHELXL-2014). All hydrogen atoms were placed using a riding model. Their positions were constrained relative to their parent atom using the appropriate HFIX command in SHELXL-2014.

SI Table 3. Crystal data and structure refinement for ( $\pm$ )-1

|                                   |                                             |                             |
|-----------------------------------|---------------------------------------------|-----------------------------|
| X-ray ID                          | maimone38                                   |                             |
| Sample/notebook ID                | ZYM-964                                     |                             |
| Empirical formula                 | C21 H32 O4                                  |                             |
| Formula weight                    | 348.46                                      |                             |
| Temperature                       | 100(2) K                                    |                             |
| Wavelength                        | 1.54178 Å                                   |                             |
| Crystal system                    | Monoclinic                                  |                             |
| Space group                       | P 21/c                                      |                             |
| Unit cell dimensions              | a = 11.5012(6) Å                            | $\alpha = 90^\circ$ .       |
|                                   | b = 15.9349(8) Å                            | $\beta = 97.550(2)^\circ$ . |
|                                   | c = 10.3245(5) Å                            | $\gamma = 90^\circ$ .       |
| Volume                            | 1875.77(16) Å <sup>3</sup>                  |                             |
| Z                                 | 4                                           |                             |
| Density (calculated)              | 1.234 Mg/m <sup>3</sup>                     |                             |
| Absorption coefficient            | 0.666 mm <sup>-1</sup>                      |                             |
| F(000)                            | 760                                         |                             |
| Crystal size                      | 0.050 x 0.040 x 0.020 mm <sup>3</sup>       |                             |
| Theta range for data collection   | 3.877 to 68.237°.                           |                             |
| Index ranges                      | -13 ≤ h ≤ 13, -19 ≤ k ≤ 19, -12 ≤ l ≤ 10    |                             |
| Reflections collected             | 56859                                       |                             |
| Independent reflections           | 3415 [R(int) = 0.0324]                      |                             |
| Completeness to theta = 67.000°   | 99.6 %                                      |                             |
| Absorption correction             | Semi-empirical from equivalents             |                             |
| Max. and min. transmission        | 0.929 and 0.829                             |                             |
| Refinement method                 | Full-matrix least-squares on F <sup>2</sup> |                             |
| Data / restraints / parameters    | 3415 / 0 / 232                              |                             |
| Goodness-of-fit on F <sup>2</sup> | 1.082                                       |                             |
| Final R indices [I > 2σ(I)]       | R1 = 0.0452, wR2 = 0.1269                   |                             |
| R indices (all data)              | R1 = 0.0465, wR2 = 0.1284                   |                             |
| Extinction coefficient            | n/a                                         |                             |
| Largest diff. peak and hole       | 0.360 and -0.233 e.Å <sup>-3</sup>          |                             |

Table 2. Atomic coordinates ( $\times 10^4$ ) and equivalent isotropic displacement parameters ( $\text{\AA}^2 \times 10^3$ ) for maimone38.  $U(\text{eq})$  is defined as one third of the trace of the orthogonalized  $U^{ij}$  tensor.

|       | x       | y       | z       | $U(\text{eq})$ |
|-------|---------|---------|---------|----------------|
| C(1)  | 8412(1) | 6097(1) | 6713(1) | 21(1)          |
| C(2)  | 9131(1) | 6309(1) | 5594(2) | 24(1)          |
| C(3)  | 8709(1) | 5850(1) | 4322(1) | 24(1)          |
| C(4)  | 7400(1) | 5972(1) | 3880(1) | 22(1)          |
| C(5)  | 6700(1) | 5749(1) | 5004(1) | 21(1)          |
| C(6)  | 7097(1) | 6291(1) | 6223(1) | 22(1)          |
| C(7)  | 6373(1) | 6034(1) | 7266(1) | 22(1)          |
| C(8)  | 6447(1) | 5218(1) | 7546(1) | 21(1)          |
| C(9)  | 7252(1) | 4747(1) | 6766(1) | 22(1)          |
| C(10) | 7259(1) | 3806(1) | 6980(2) | 23(1)          |
| C(11) | 7850(1) | 3570(1) | 8352(2) | 24(1)          |
| C(12) | 9084(1) | 3941(1) | 8589(2) | 26(1)          |
| C(13) | 9076(1) | 4895(1) | 8416(2) | 24(1)          |
| C(14) | 8494(1) | 5136(1) | 7046(1) | 21(1)          |
| C(15) | 8829(2) | 6673(1) | 7872(2) | 27(1)          |
| C(16) | 6967(1) | 5540(1) | 2569(2) | 25(1)          |
| C(17) | 7395(2) | 6020(1) | 1433(2) | 29(1)          |
| C(18) | 7300(2) | 4615(1) | 2498(2) | 37(1)          |
| C(19) | 5657(1) | 6657(1) | 7877(2) | 23(1)          |
| C(20) | 4590(2) | 6934(1) | 9622(2) | 28(1)          |
| C(21) | 7859(2) | 2620(1) | 8535(2) | 30(1)          |
| O(1)  | 6860(1) | 4884(1) | 5369(1) | 21(1)          |
| O(2)  | 5506(1) | 5883(1) | 4536(1) | 24(1)          |
| O(3)  | 5480(1) | 7363(1) | 7478(1) | 35(1)          |
| O(4)  | 5246(1) | 6350(1) | 8928(1) | 25(1)          |

Table 3. Bond lengths [Å] and angles [°] for maimone38.

|                 |            |                  |            |
|-----------------|------------|------------------|------------|
| C(1)-C(15)      | 1.535(2)   | C(11)-H(11)      | 1.0000     |
| C(1)-C(2)       | 1.544(2)   | C(12)-C(13)      | 1.531(2)   |
| C(1)-C(6)       | 1.562(2)   | C(12)-H(12A)     | 0.9900     |
| C(1)-C(14)      | 1.569(2)   | C(12)-H(12B)     | 0.9900     |
| C(2)-C(3)       | 1.526(2)   | C(13)-C(14)      | 1.531(2)   |
| C(2)-H(2A)      | 0.9900     | C(13)-H(13A)     | 0.9900     |
| C(2)-H(2B)      | 0.9900     | C(13)-H(13B)     | 0.9900     |
| C(3)-C(4)       | 1.527(2)   | C(14)-H(14)      | 1.0000     |
| C(3)-H(3A)      | 0.9900     | C(15)-H(15A)     | 0.9800     |
| C(3)-H(3B)      | 0.9900     | C(15)-H(15B)     | 0.9800     |
| C(4)-C(5)       | 1.537(2)   | C(15)-H(15C)     | 0.9800     |
| C(4)-C(16)      | 1.542(2)   | C(16)-C(18)      | 1.526(2)   |
| C(4)-H(4)       | 1.0000     | C(16)-C(17)      | 1.534(2)   |
| C(5)-O(2)       | 1.4116(18) | C(16)-H(16)      | 1.0000     |
| C(5)-O(1)       | 1.4346(17) | C(17)-H(17A)     | 0.9800     |
| C(5)-C(6)       | 1.546(2)   | C(17)-H(17B)     | 0.9800     |
| C(6)-C(7)       | 1.502(2)   | C(17)-H(17C)     | 0.9800     |
| C(6)-H(6)       | 1.0000     | C(18)-H(18A)     | 0.9800     |
| C(7)-C(8)       | 1.332(2)   | C(18)-H(18B)     | 0.9800     |
| C(7)-C(19)      | 1.482(2)   | C(18)-H(18C)     | 0.9800     |
| C(8)-C(9)       | 1.505(2)   | C(19)-O(3)       | 1.2057(19) |
| C(8)-H(8)       | 0.9500     | C(19)-O(4)       | 1.3328(18) |
| C(9)-O(1)       | 1.4689(17) | C(20)-O(4)       | 1.4458(18) |
| C(9)-C(10)      | 1.516(2)   | C(20)-H(20A)     | 0.9800     |
| C(9)-C(14)      | 1.549(2)   | C(20)-H(20B)     | 0.9800     |
| C(10)-C(11)     | 1.535(2)   | C(20)-H(20C)     | 0.9800     |
| C(10)-H(10A)    | 0.9900     | C(21)-H(21A)     | 0.9800     |
| C(10)-H(10B)    | 0.9900     | C(21)-H(21B)     | 0.9800     |
| C(11)-C(21)     | 1.527(2)   | C(21)-H(21C)     | 0.9800     |
| C(11)-C(12)     | 1.528(2)   | O(2)-H(2)        | 0.8400     |
| C(15)-C(1)-C(2) | 107.98(12) | C(15)-C(1)-C(14) | 114.18(12) |
| C(15)-C(1)-C(6) | 108.89(12) | C(2)-C(1)-C(14)  | 110.84(12) |
| C(2)-C(1)-C(6)  | 107.79(12) | C(6)-C(1)-C(14)  | 106.97(11) |

|                  |            |                     |            |
|------------------|------------|---------------------|------------|
| C(3)-C(2)-C(1)   | 113.43(12) | O(1)-C(9)-C(8)      | 108.71(11) |
| C(3)-C(2)-H(2A)  | 108.9      | O(1)-C(9)-C(10)     | 106.55(11) |
| C(1)-C(2)-H(2A)  | 108.9      | C(8)-C(9)-C(10)     | 114.04(12) |
| C(3)-C(2)-H(2B)  | 108.9      | O(1)-C(9)-C(14)     | 106.32(11) |
| C(1)-C(2)-H(2B)  | 108.9      | C(8)-C(9)-C(14)     | 108.48(12) |
| H(2A)-C(2)-H(2B) | 107.7      | C(10)-C(9)-C(14)    | 112.40(12) |
| C(2)-C(3)-C(4)   | 112.69(12) | C(9)-C(10)-C(11)    | 111.73(12) |
| C(2)-C(3)-H(3A)  | 109.1      | C(9)-C(10)-H(10A)   | 109.3      |
| C(4)-C(3)-H(3A)  | 109.1      | C(11)-C(10)-H(10A)  | 109.3      |
| C(2)-C(3)-H(3B)  | 109.1      | C(9)-C(10)-H(10B)   | 109.3      |
| C(4)-C(3)-H(3B)  | 109.1      | C(11)-C(10)-H(10B)  | 109.3      |
| H(3A)-C(3)-H(3B) | 107.8      | H(10A)-C(10)-H(10B) | 107.9      |
| C(3)-C(4)-C(5)   | 109.79(12) | C(21)-C(11)-C(12)   | 111.86(13) |
| C(3)-C(4)-C(16)  | 113.39(12) | C(21)-C(11)-C(10)   | 110.61(13) |
| C(5)-C(4)-C(16)  | 114.76(12) | C(12)-C(11)-C(10)   | 110.01(12) |
| C(3)-C(4)-H(4)   | 106.1      | C(21)-C(11)-H(11)   | 108.1      |
| C(5)-C(4)-H(4)   | 106.1      | C(12)-C(11)-H(11)   | 108.1      |
| C(16)-C(4)-H(4)  | 106.1      | C(10)-C(11)-H(11)   | 108.1      |
| O(2)-C(5)-O(1)   | 108.70(11) | C(11)-C(12)-C(13)   | 111.93(12) |
| O(2)-C(5)-C(4)   | 106.82(11) | C(11)-C(12)-H(12A)  | 109.2      |
| O(1)-C(5)-C(4)   | 111.05(11) | C(13)-C(12)-H(12A)  | 109.2      |
| O(2)-C(5)-C(6)   | 111.33(12) | C(11)-C(12)-H(12B)  | 109.2      |
| O(1)-C(5)-C(6)   | 107.99(11) | C(13)-C(12)-H(12B)  | 109.2      |
| C(4)-C(5)-C(6)   | 110.95(12) | H(12A)-C(12)-H(12B) | 107.9      |
| C(7)-C(6)-C(5)   | 107.43(12) | C(12)-C(13)-C(14)   | 110.62(12) |
| C(7)-C(6)-C(1)   | 108.57(12) | C(12)-C(13)-H(13A)  | 109.5      |
| C(5)-C(6)-C(1)   | 108.81(12) | C(14)-C(13)-H(13A)  | 109.5      |
| C(7)-C(6)-H(6)   | 110.6      | C(12)-C(13)-H(13B)  | 109.5      |
| C(5)-C(6)-H(6)   | 110.6      | C(14)-C(13)-H(13B)  | 109.5      |
| C(1)-C(6)-H(6)   | 110.6      | H(13A)-C(13)-H(13B) | 108.1      |
| C(8)-C(7)-C(19)  | 125.81(14) | C(13)-C(14)-C(9)    | 110.68(12) |
| C(8)-C(7)-C(6)   | 113.30(13) | C(13)-C(14)-C(1)    | 116.95(12) |
| C(19)-C(7)-C(6)  | 120.88(13) | C(9)-C(14)-C(1)     | 108.80(11) |
| C(7)-C(8)-C(9)   | 113.40(13) | C(13)-C(14)-H(14)   | 106.6      |
| C(7)-C(8)-H(8)   | 123.3      | C(9)-C(14)-H(14)    | 106.6      |
| C(9)-C(8)-H(8)   | 123.3      | C(1)-C(14)-H(14)    | 106.6      |



|                     |            |                     |            |
|---------------------|------------|---------------------|------------|
| C(1)-C(15)-H(15A)   | 109.5      | C(11)-C(21)-H(21C)  | 109.5      |
| C(1)-C(15)-H(15B)   | 109.5      | H(21A)-C(21)-H(21C) | 109.5      |
| H(15A)-C(15)-H(15B) | 109.5      | H(21B)-C(21)-H(21C) | 109.5      |
| C(1)-C(15)-H(15C)   | 109.5      | C(5)-O(1)-C(9)      | 114.37(10) |
| H(15A)-C(15)-H(15C) | 109.5      | C(5)-O(2)-H(2)      | 109.5      |
| H(15B)-C(15)-H(15C) | 109.5      | C(19)-O(4)-C(20)    | 115.56(12) |
| C(18)-C(16)-C(17)   | 109.70(13) |                     |            |
| C(18)-C(16)-C(4)    | 114.77(13) |                     |            |
| C(17)-C(16)-C(4)    | 110.49(12) |                     |            |
| C(18)-C(16)-H(16)   | 107.2      |                     |            |
| C(17)-C(16)-H(16)   | 107.2      |                     |            |
| C(4)-C(16)-H(16)    | 107.2      |                     |            |
| C(16)-C(17)-H(17A)  | 109.5      |                     |            |
| C(16)-C(17)-H(17B)  | 109.5      |                     |            |
| H(17A)-C(17)-H(17B) | 109.5      |                     |            |
| C(16)-C(17)-H(17C)  | 109.5      |                     |            |
| H(17A)-C(17)-H(17C) | 109.5      |                     |            |
| H(17B)-C(17)-H(17C) | 109.5      |                     |            |
| C(16)-C(18)-H(18A)  | 109.5      |                     |            |
| C(16)-C(18)-H(18B)  | 109.5      |                     |            |
| H(18A)-C(18)-H(18B) | 109.5      |                     |            |
| C(16)-C(18)-H(18C)  | 109.5      |                     |            |
| H(18A)-C(18)-H(18C) | 109.5      |                     |            |
| H(18B)-C(18)-H(18C) | 109.5      |                     |            |
| O(3)-C(19)-O(4)     | 123.98(14) |                     |            |
| O(3)-C(19)-C(7)     | 123.90(14) |                     |            |
| O(4)-C(19)-C(7)     | 112.12(13) |                     |            |
| O(4)-C(20)-H(20A)   | 109.5      |                     |            |
| O(4)-C(20)-H(20B)   | 109.5      |                     |            |
| H(20A)-C(20)-H(20B) | 109.5      |                     |            |
| O(4)-C(20)-H(20C)   | 109.5      |                     |            |
| H(20A)-C(20)-H(20C) | 109.5      |                     |            |
| H(20B)-C(20)-H(20C) | 109.5      |                     |            |
| C(11)-C(21)-H(21A)  | 109.5      |                     |            |
| C(11)-C(21)-H(21B)  | 109.5      |                     |            |
| H(21A)-C(21)-H(21B) | 109.5      |                     |            |

---

Symmetry transformations used to generate equivalent atoms:

Table 4. Anisotropic displacement parameters ( $\text{\AA}^2 \times 10^3$ ) for maimone38. The anisotropic displacement factor exponent takes the form:  $-2\pi^2 [ h^2 a^{*2} U^{11} + \dots + 2 h k a^* b^* U^{12} ]$

|       | $U^{11}$ | $U^{22}$ | $U^{33}$ | $U^{23}$ | $U^{13}$ | $U^{12}$ |
|-------|----------|----------|----------|----------|----------|----------|
| C(1)  | 25(1)    | 20(1)    | 19(1)    | 0(1)     | 2(1)     | -2(1)    |
| C(2)  | 24(1)    | 24(1)    | 23(1)    | 2(1)     | 3(1)     | -3(1)    |
| C(3)  | 27(1)    | 25(1)    | 20(1)    | 2(1)     | 6(1)     | -1(1)    |
| C(4)  | 26(1)    | 19(1)    | 20(1)    | 2(1)     | 4(1)     | -1(1)    |
| C(5)  | 24(1)    | 18(1)    | 21(1)    | 2(1)     | 3(1)     | 1(1)     |
| C(6)  | 26(1)    | 19(1)    | 21(1)    | 2(1)     | 4(1)     | 0(1)     |
| C(7)  | 24(1)    | 23(1)    | 19(1)    | 1(1)     | 3(1)     | 0(1)     |
| C(8)  | 23(1)    | 23(1)    | 18(1)    | 2(1)     | 2(1)     | -1(1)    |
| C(9)  | 25(1)    | 21(1)    | 19(1)    | 2(1)     | 2(1)     | 0(1)     |
| C(10) | 26(1)    | 20(1)    | 24(1)    | 1(1)     | 4(1)     | 0(1)     |
| C(11) | 26(1)    | 23(1)    | 23(1)    | 4(1)     | 7(1)     | 2(1)     |
| C(12) | 27(1)    | 28(1)    | 22(1)    | 5(1)     | 2(1)     | 2(1)     |
| C(13) | 26(1)    | 27(1)    | 20(1)    | 2(1)     | 0(1)     | -1(1)    |
| C(14) | 23(1)    | 21(1)    | 18(1)    | 1(1)     | 3(1)     | 0(1)     |
| C(15) | 35(1)    | 23(1)    | 23(1)    | -2(1)    | 1(1)     | -4(1)    |
| C(16) | 26(1)    | 26(1)    | 23(1)    | -1(1)    | 3(1)     | -3(1)    |
| C(17) | 37(1)    | 32(1)    | 19(1)    | 0(1)     | 2(1)     | 1(1)     |
| C(18) | 57(1)    | 26(1)    | 27(1)    | -5(1)    | 5(1)     | -6(1)    |
| C(19) | 26(1)    | 22(1)    | 21(1)    | 0(1)     | 2(1)     | 0(1)     |
| C(20) | 33(1)    | 27(1)    | 26(1)    | -4(1)    | 10(1)    | 1(1)     |
| C(21) | 34(1)    | 26(1)    | 31(1)    | 7(1)     | 6(1)     | 3(1)     |
| O(1)  | 27(1)    | 19(1)    | 17(1)    | 1(1)     | 2(1)     | 0(1)     |
| O(2)  | 22(1)    | 26(1)    | 23(1)    | 4(1)     | 4(1)     | 1(1)     |
| O(3)  | 51(1)    | 24(1)    | 33(1)    | 4(1)     | 18(1)    | 9(1)     |
| O(4)  | 31(1)    | 23(1)    | 22(1)    | 2(1)     | 9(1)     | 4(1)     |

Table 5. Hydrogen coordinates ( $\times 10^4$ ) and isotropic displacement parameters ( $\text{\AA}^2 \times 10^3$ ) for maimone38.

|        | x    | y    | z     | U(eq) |
|--------|------|------|-------|-------|
| H(2A)  | 9088 | 6922 | 5432  | 28    |
| H(2B)  | 9963 | 6164 | 5873  | 28    |
| H(3A)  | 8874 | 5243 | 4442  | 28    |
| H(3B)  | 9155 | 6056 | 3629  | 28    |
| H(4)   | 7285 | 6587 | 3725  | 26    |
| H(6)   | 6986 | 6901 | 6015  | 26    |
| H(8)   | 6033 | 4959 | 8177  | 26    |
| H(10A) | 7682 | 3532 | 6319  | 28    |
| H(10B) | 6442 | 3595 | 6860  | 28    |
| H(11)  | 7380 | 3822 | 9003  | 29    |
| H(12A) | 9570 | 3685 | 7971  | 31    |
| H(12B) | 9446 | 3801 | 9486  | 31    |
| H(13A) | 9891 | 5109 | 8550  | 29    |
| H(13B) | 8643 | 5157 | 9079  | 29    |
| H(14)  | 8974 | 4874 | 6414  | 25    |
| H(15A) | 9664 | 6575 | 8159  | 41    |
| H(15B) | 8379 | 6553 | 8593  | 41    |
| H(15C) | 8710 | 7260 | 7604  | 41    |
| H(16)  | 6091 | 5570 | 2443  | 30    |
| H(17A) | 8254 | 6001 | 1522  | 44    |
| H(17B) | 7135 | 6605 | 1447  | 44    |
| H(17C) | 7070 | 5760 | 603   | 44    |
| H(18A) | 6930 | 4377 | 1670  | 55    |
| H(18B) | 7029 | 4311 | 3228  | 55    |
| H(18C) | 8154 | 4564 | 2551  | 55    |
| H(20A) | 4991 | 7478 | 9689  | 42    |
| H(20B) | 4536 | 6717 | 10501 | 42    |
| H(20C) | 3800 | 7003 | 9148  | 42    |
| H(21A) | 8275 | 2357 | 7870  | 45    |
| H(21B) | 7051 | 2411 | 8445  | 45    |
| H(21C) | 8258 | 2480 | 9406  | 45    |

H(2)

5088

5689

5075

36

---

0.90  
0.91  
1.17  
1.18  
1.19  
1.20  
1.20  
1.20  
1.21  
1.21  
1.22  
1.22  
1.23  
1.23  
1.24  
1.24  
1.28  
1.29  
1.29  
1.30  
1.30  
1.31  
1.31  
1.32  
1.32  
1.32  
1.33  
1.33  
1.35  
1.58  
1.58  
1.59  
1.66  
1.66  
1.67  
1.70  
1.92  
1.94  
1.94  
1.95  
1.95  
1.96  
1.97  
1.98  
1.98  
1.99  
1.99  
2.00  
2.01  
2.01  
2.01  
2.02  
2.02  
2.03  
2.03  
2.04  
2.04  
2.04  
2.04  
2.05  
2.07  
2.07  
2.07  
2.27  
2.29  
2.31  
2.32  
2.46  
2.47  
2.49  
2.50  
3.26  
3.29  
3.29  
3.32  
5.05  
5.05  
5.06  
5.06  
5.06  
5.06  
5.07  
5.07  
5.07  
5.08  
5.08  
5.09  
5.09  
5.32  
5.32  
7.26

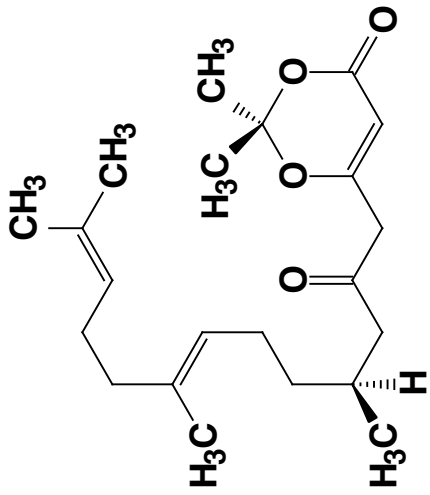

3.07  
1.10  
1.06  
6.08  
3.12  
6.13  
7.14  
1.00  
1.00  
2.02  
1.97  
0.95

0.0  
0.5  
1.0  
1.5  
2.0  
2.5  
3.0  
3.5  
4.0  
4.5  
5.0  
5.5  
6.0  
6.5  
7.0  
7.5  
8.0  
8.5  
9.0  
9.5  
10.0

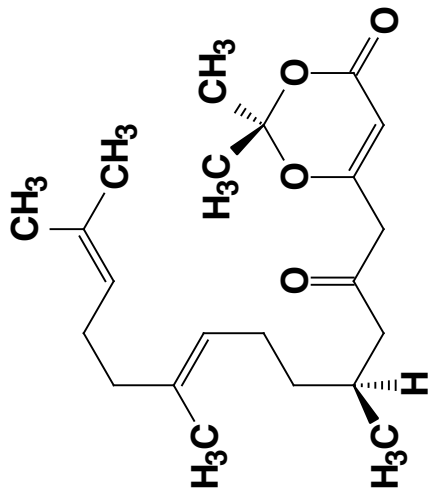

- 16.14
- 17.82
- 19.80
- 25.15
- 25.20
- 25.44
- 25.82
- 26.83
- 28.90
- 36.91
- 39.84
- 47.62
- 50.69
- 76.95
- 77.16
- 77.37
- 96.80
- 107.31
- 124.00
- 124.38
- 131.50
- 135.56
- 160.78
- 164.69
- 203.12

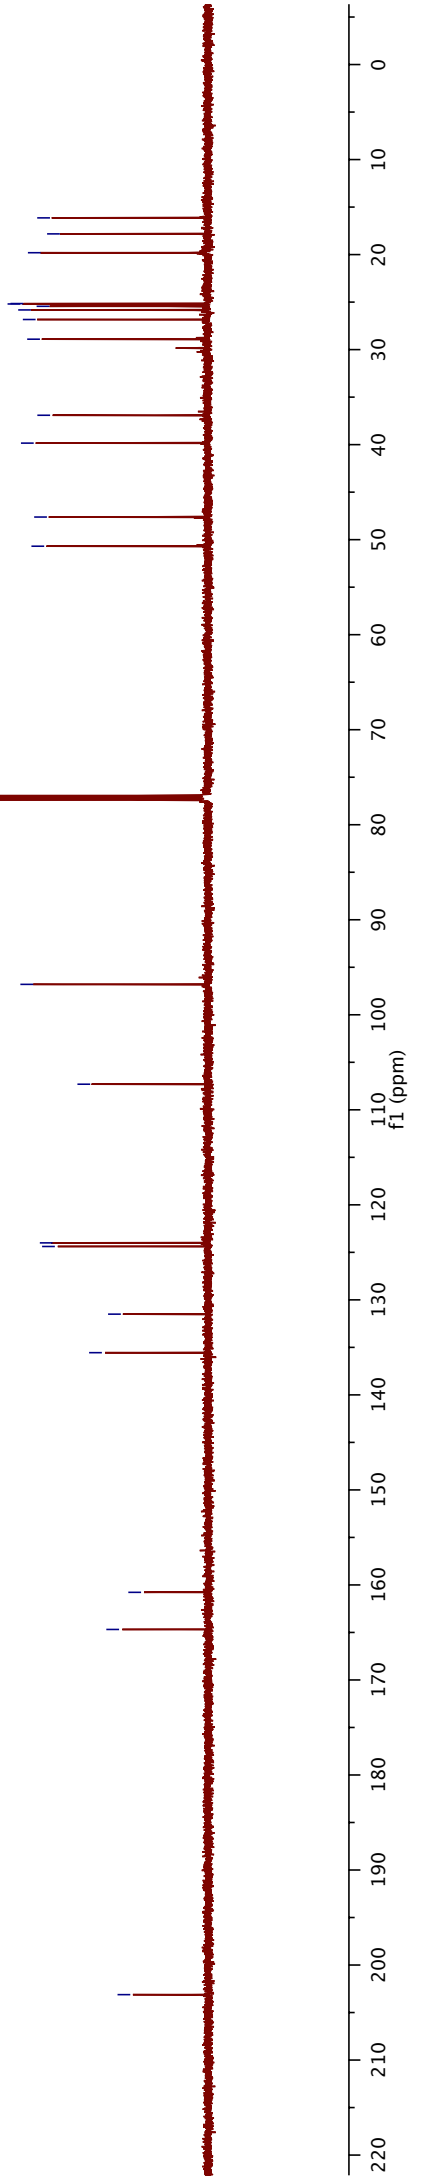

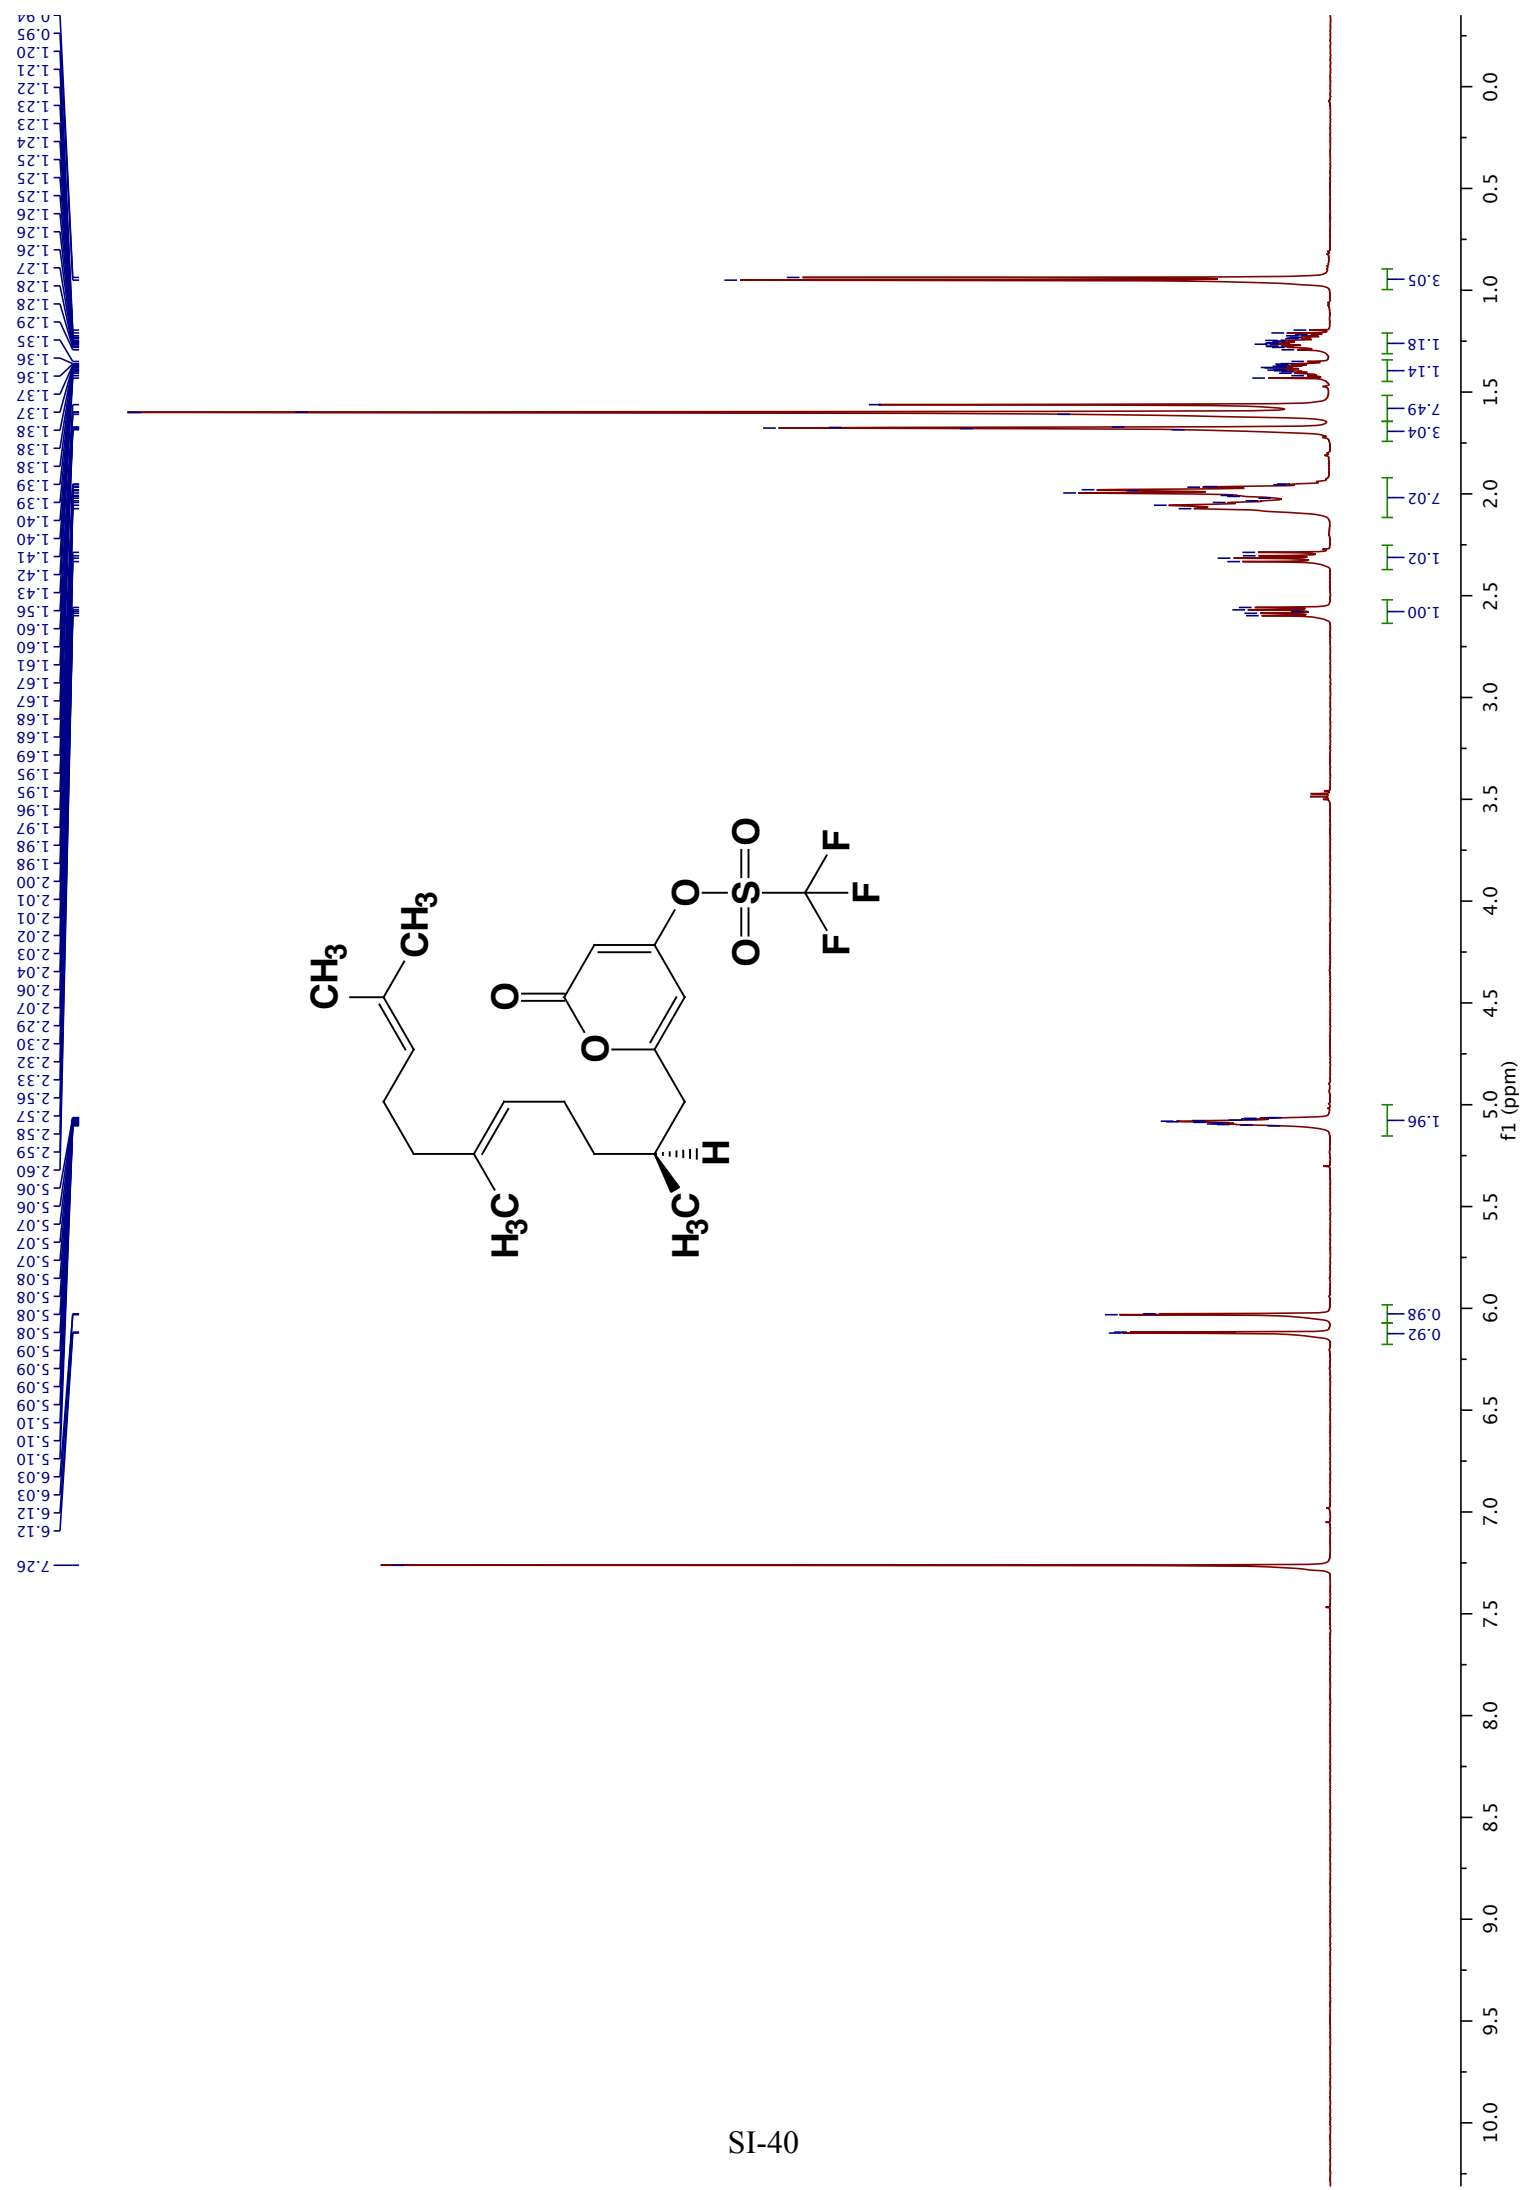



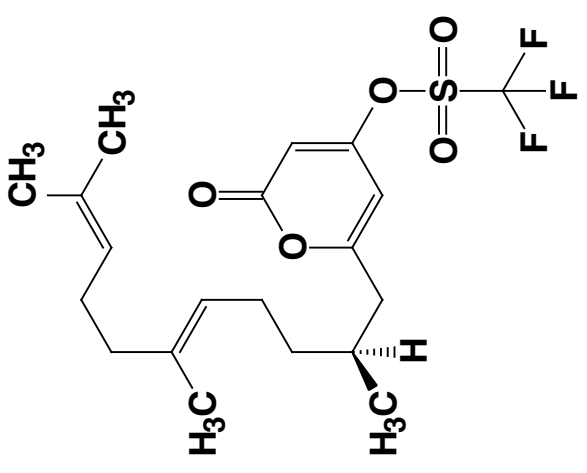

16.10  
17.76  
19.32  
25.33  
25.78  
26.78  
31.45  
36.73  
39.81  
41.74  
76.95  
77.16  
77.37

100.02  
102.53  
115.36  
117.49  
119.62  
121.74  
123.73  
124.36  
131.45  
135.77  
160.95  
161.79  
168.70

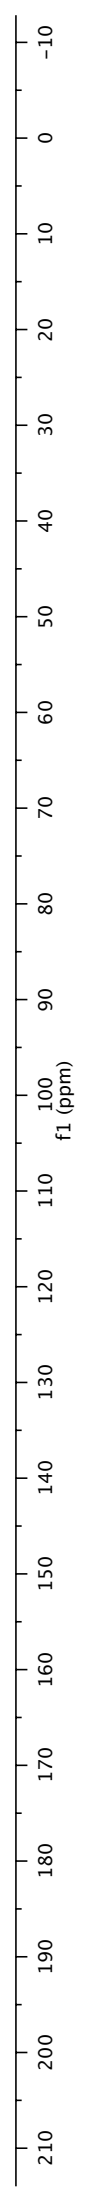

0.79  
1.04  
1.05  
1.43  
1.45  
1.46  
1.47  
1.48  
1.49  
1.60  
1.61  
1.63  
1.64  
1.65  
1.66  
1.67  
1.72  
1.73  
1.73  
1.73  
1.74  
1.75  
1.75  
1.76  
1.89  
1.90  
1.91  
1.92  
1.93  
1.94  
1.95  
2.11  
2.12  
2.13  
2.14  
2.15  
2.16  
2.17  
2.24  
2.25  
2.25  
2.25  
2.27  
2.27  
2.27  
2.27  
3.69  
3.69  
3.80

5.06  
5.07  
5.07  
5.07  
5.08  
5.09

7.26  
7.15  
7.14

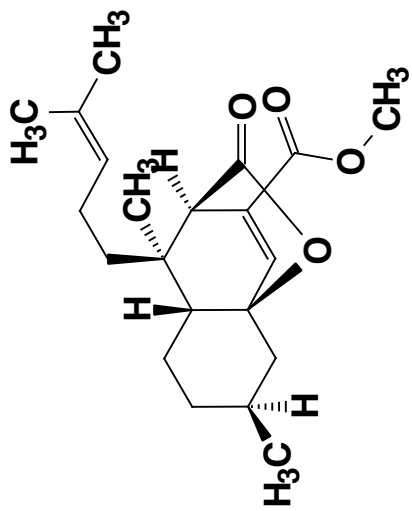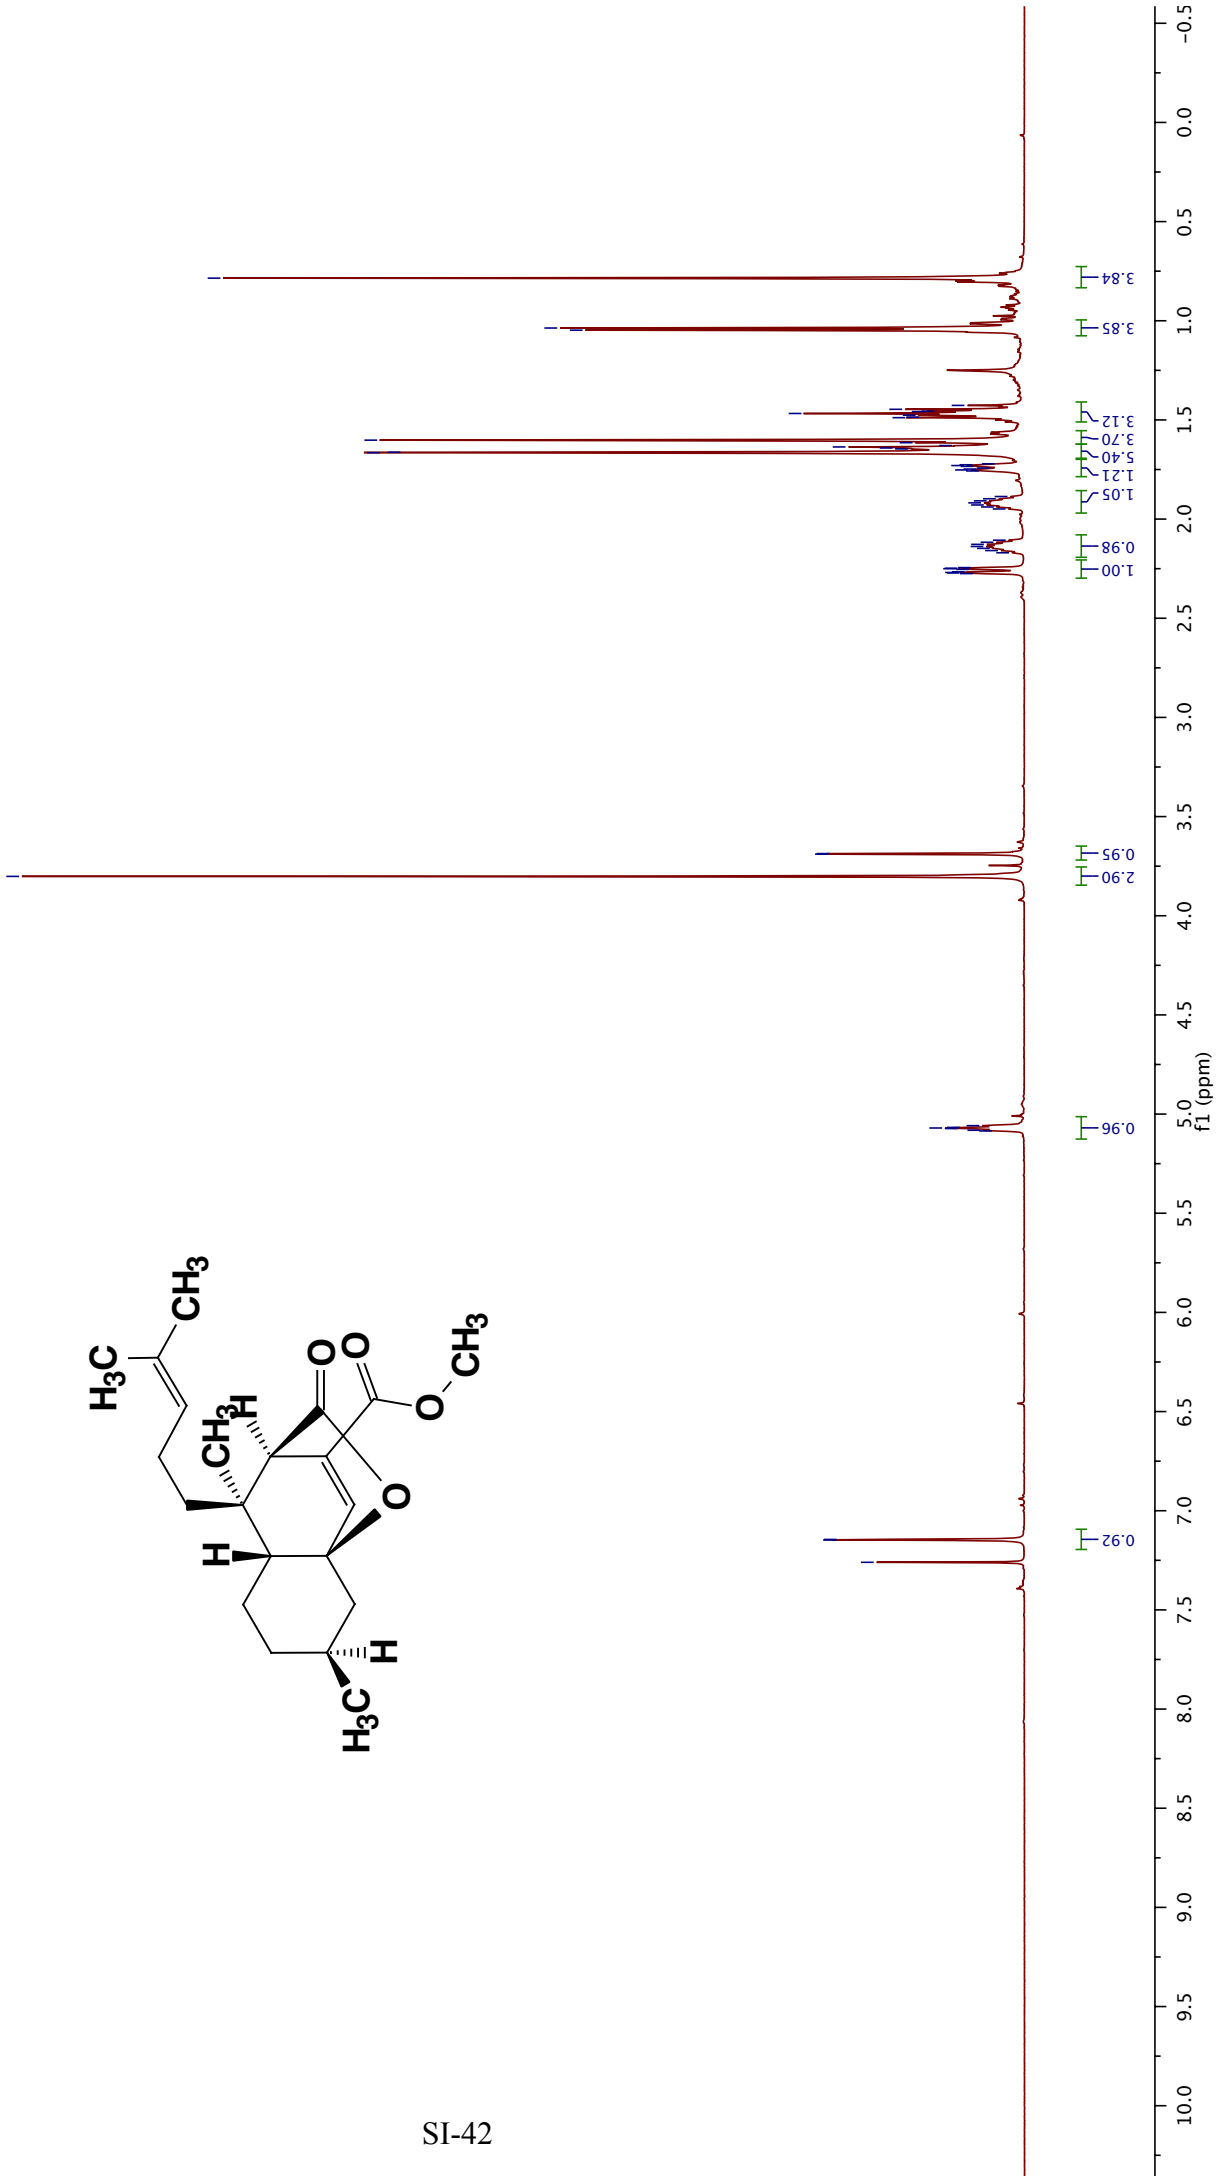

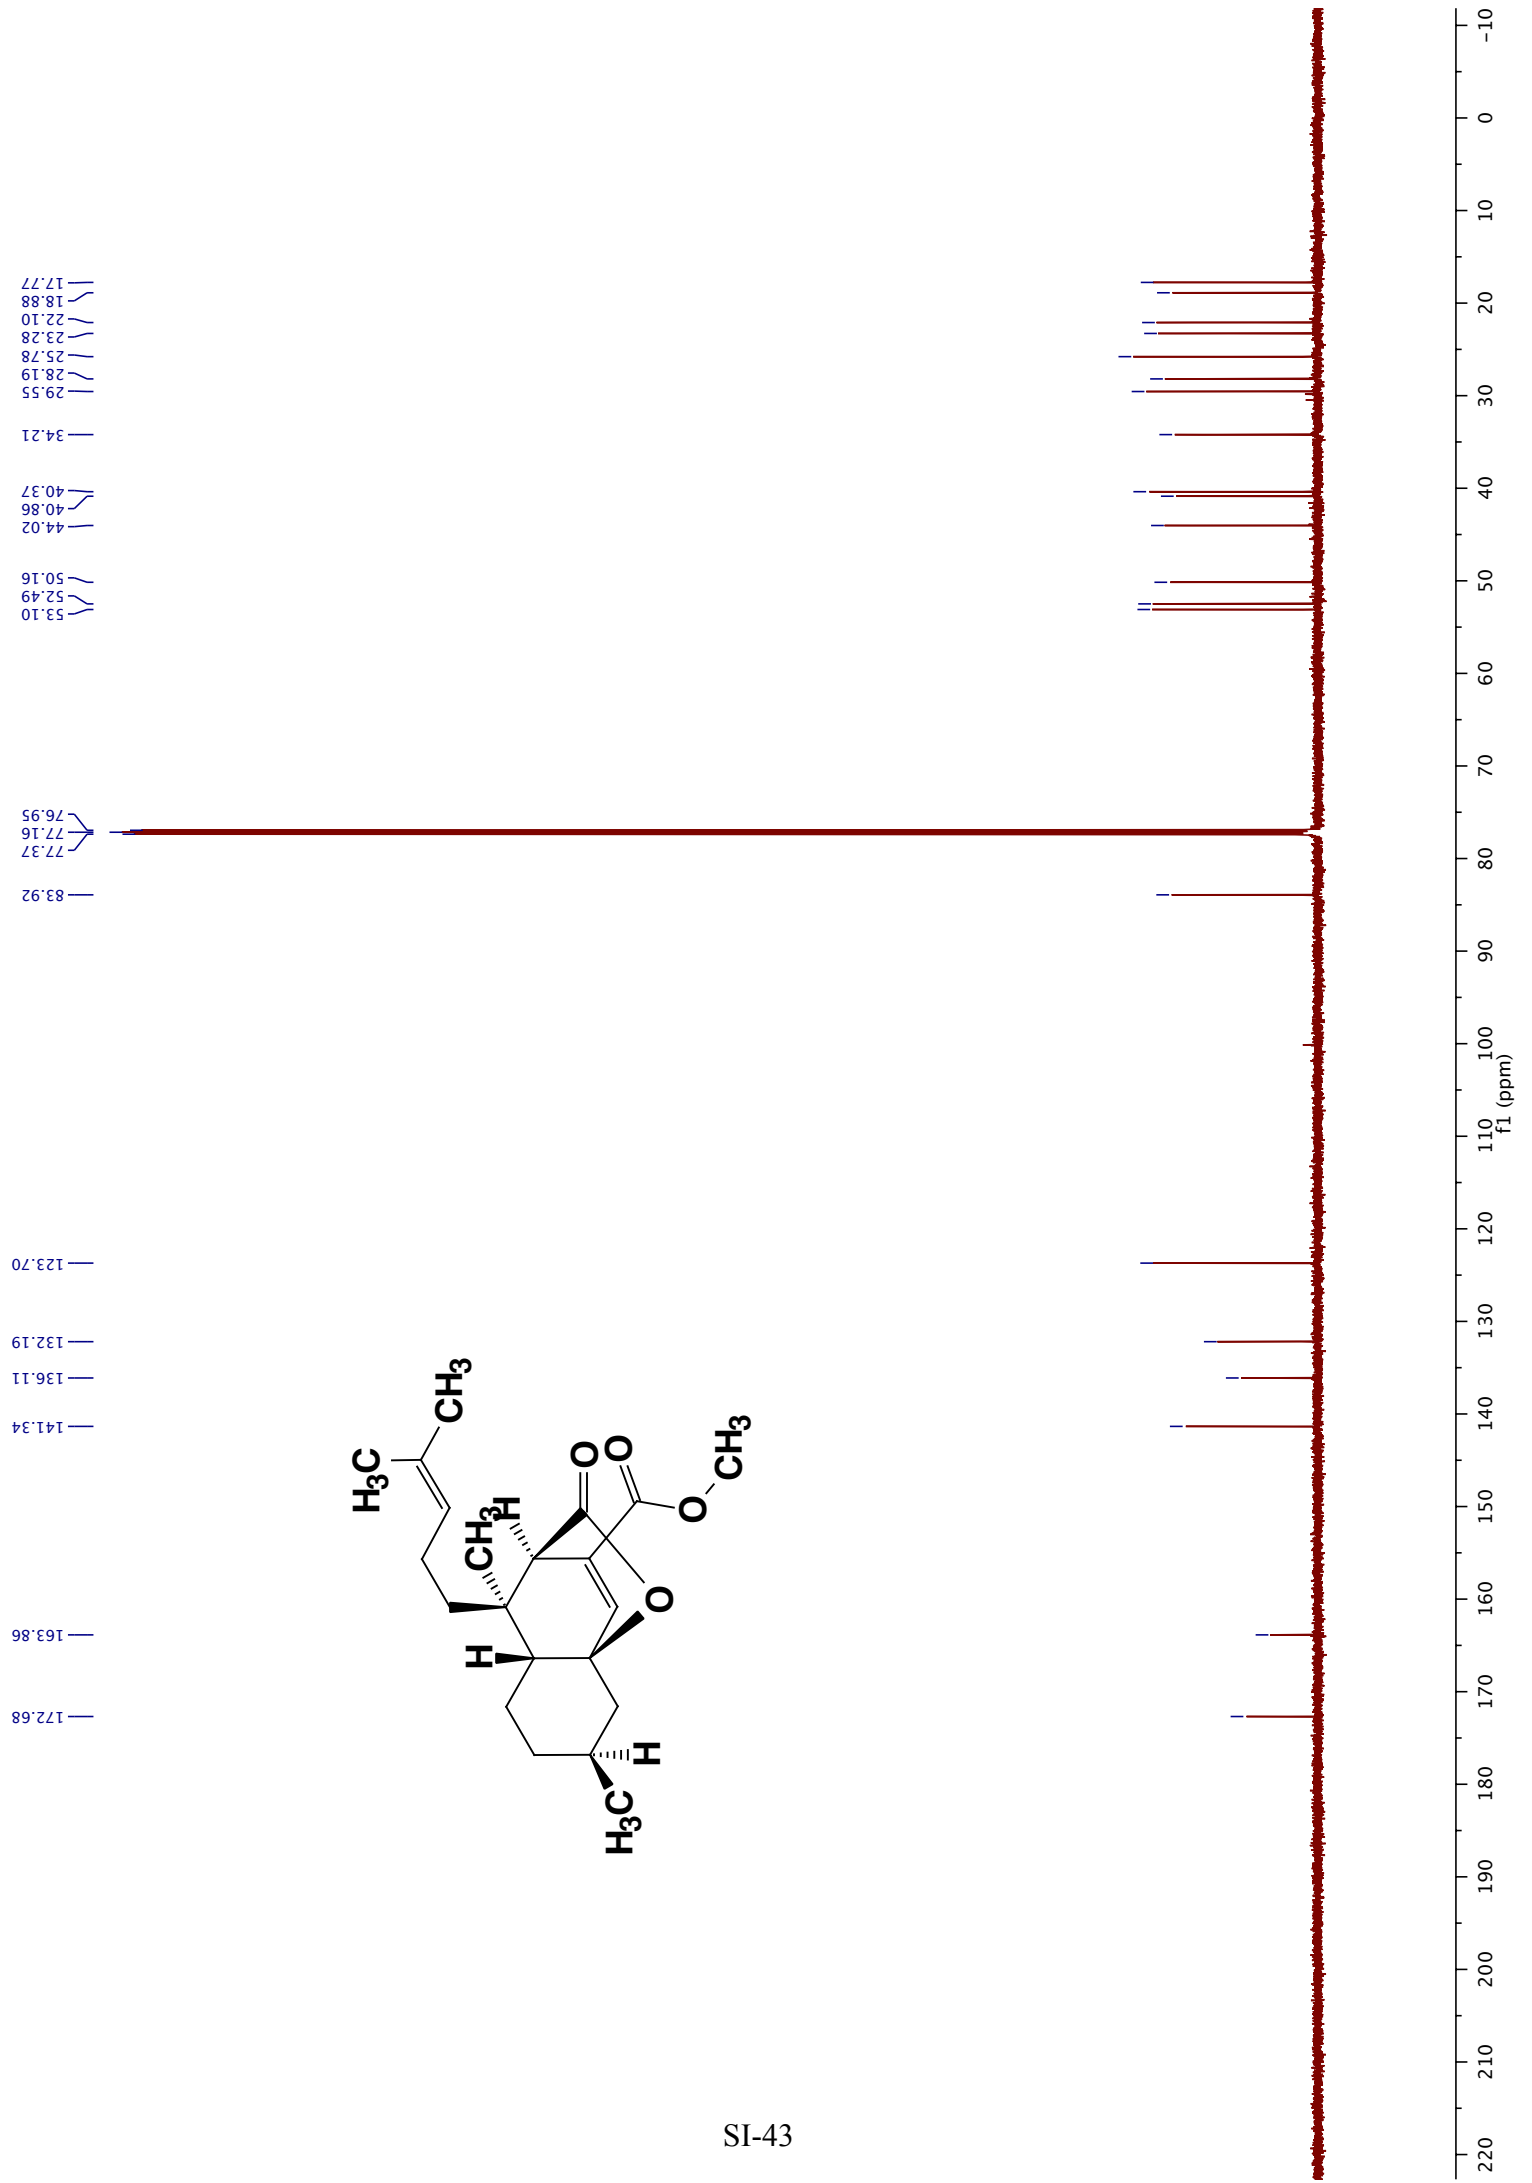



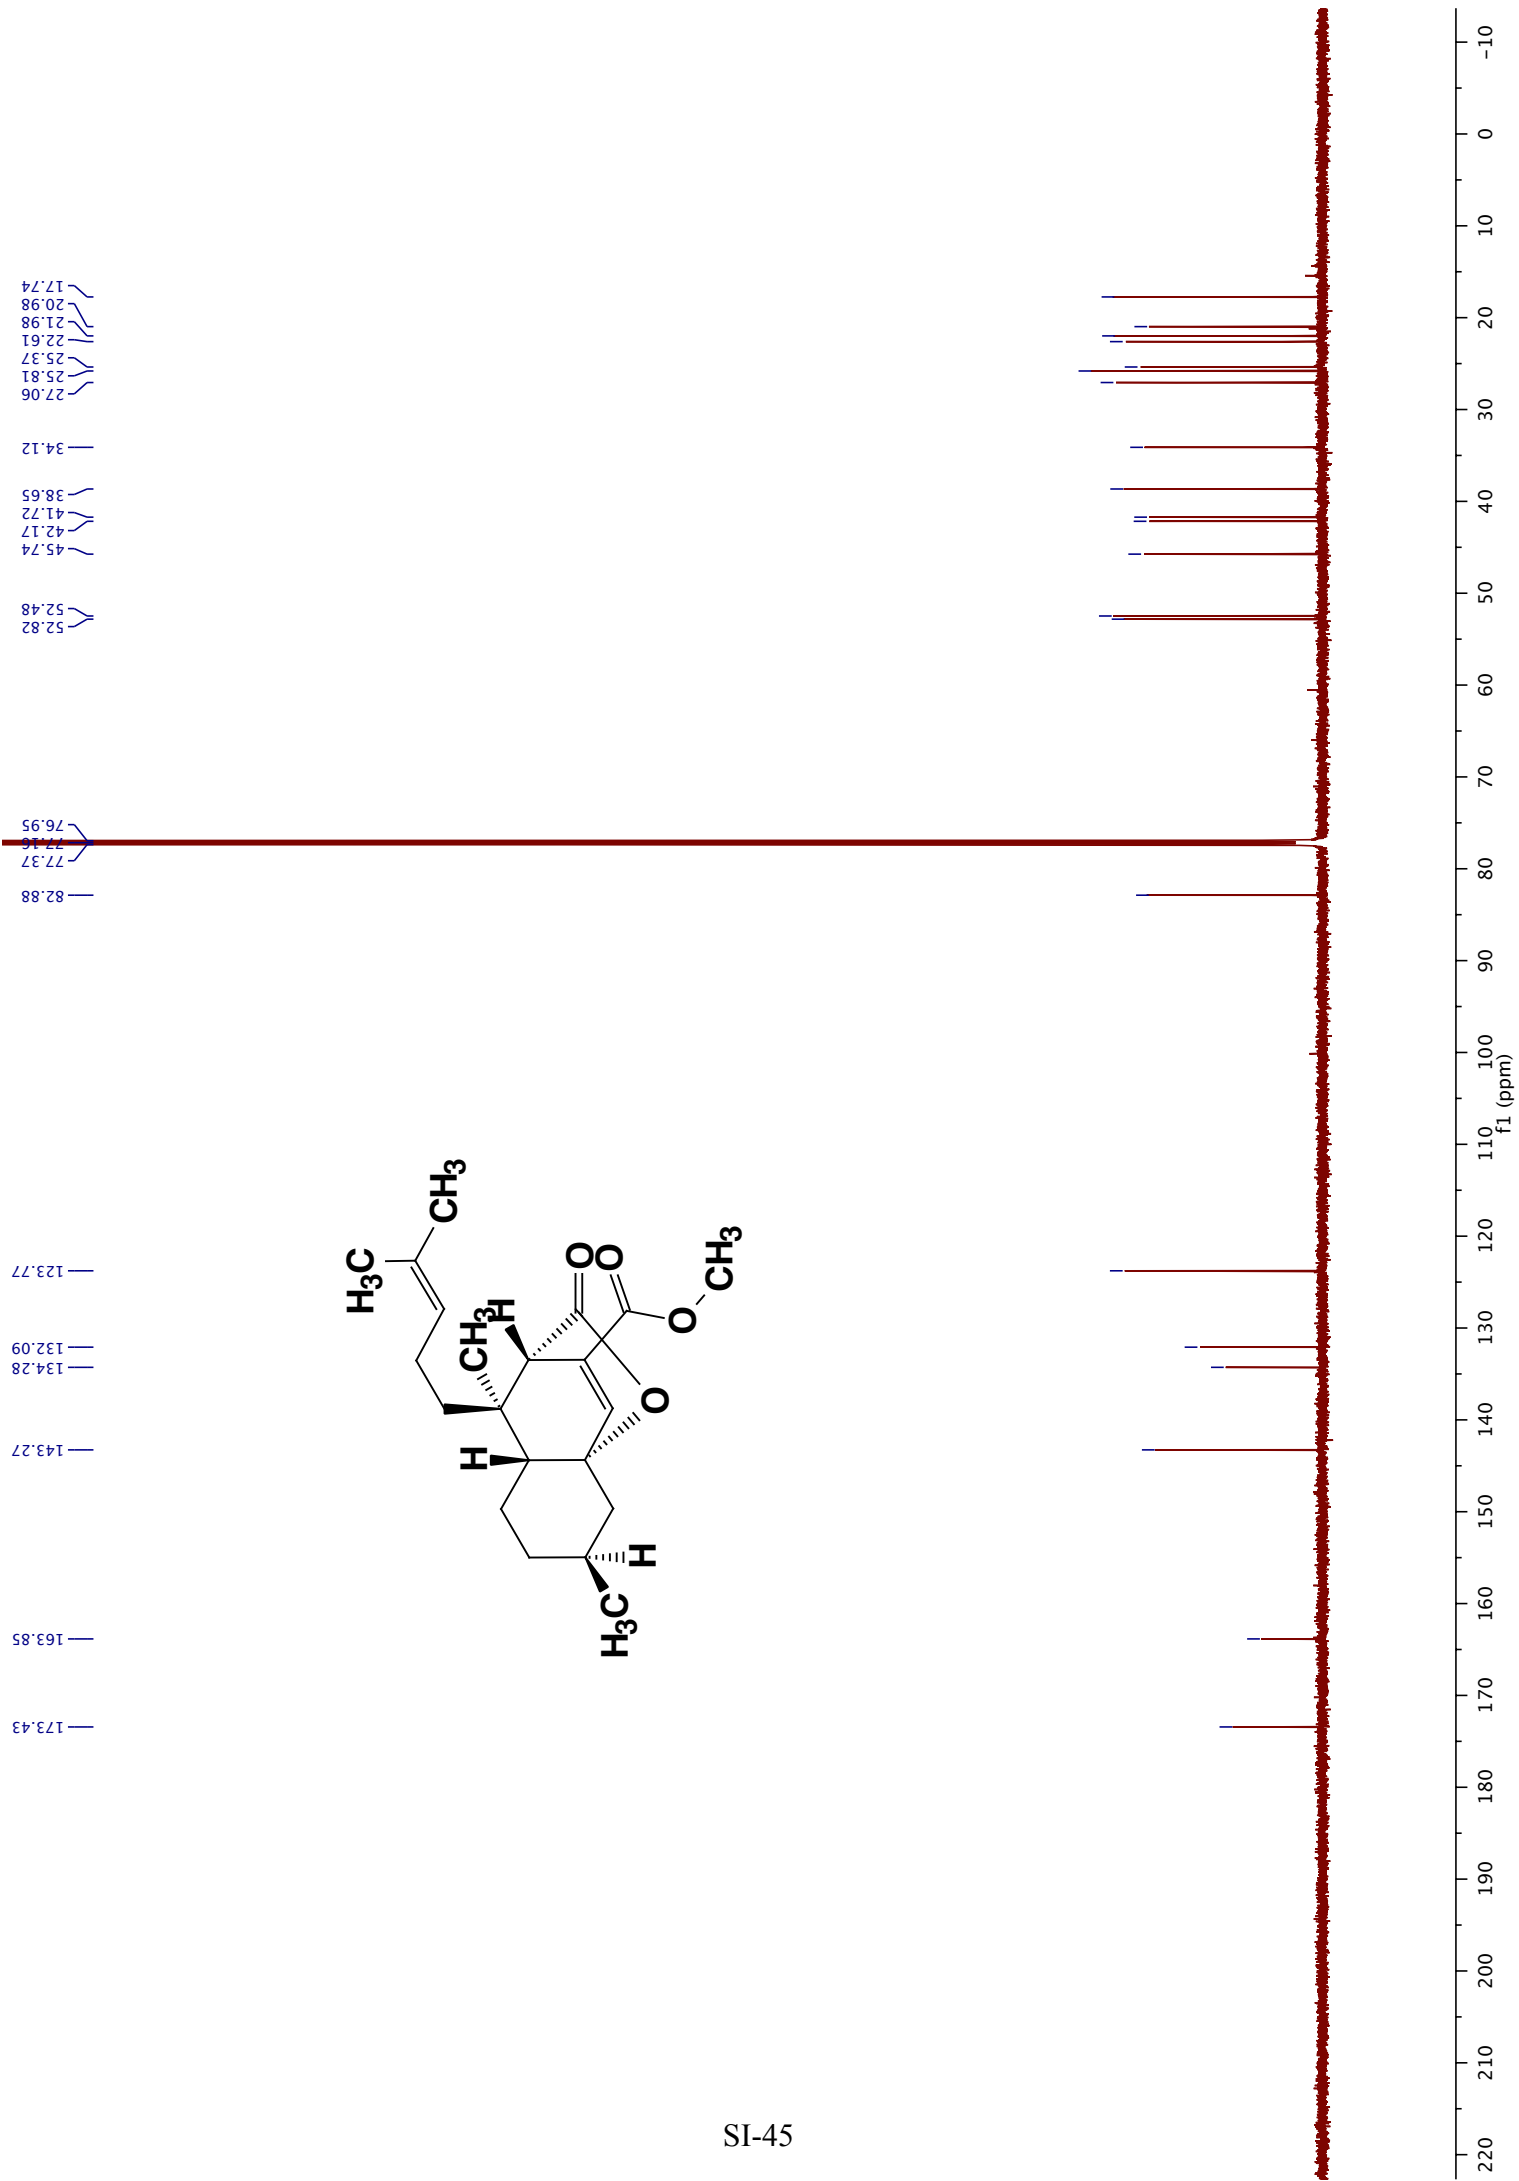

0.78  
1.04  
1.04  
1.05  
1.05  
1.19  
1.20  
1.22  
1.23  
1.25  
1.32  
1.32  
1.34  
1.34  
1.35  
1.37  
1.38  
1.38  
1.43  
1.44  
1.45  
1.46  
1.47  
1.48  
1.48  
1.49  
1.50  
1.53  
1.54  
1.54  
1.55  
1.56  
1.56  
1.57  
1.57  
1.58  
1.58  
1.59  
1.60  
1.60  
1.61  
1.61  
1.62  
1.63  
1.64  
1.64  
1.65  
1.65  
1.66  
1.67  
1.67  
1.68  
1.68  
1.69  
1.69  
1.70  
1.72  
1.73  
1.73  
1.74  
1.74  
1.76  
1.76  
1.76  
1.77  
1.77  
1.79  
1.79  
1.79  
1.80  
1.80  
1.81  
1.81  
1.82  
1.83  
1.83  
1.84  
1.85  
1.85  
1.97  
1.98  
1.98  
1.99  
2.00  
2.01  
2.02  
2.25  
2.25  
2.25  
2.26  
2.27  
2.27  
2.28  
2.28  
2.28  
3.68  
3.69  
3.69  
3.70  
3.80  
4.28  
4.30  
4.31  
4.32  
4.91  
4.91  
4.92  
5.01  
5.01  
7.15  
7.16  
7.16  
7.26

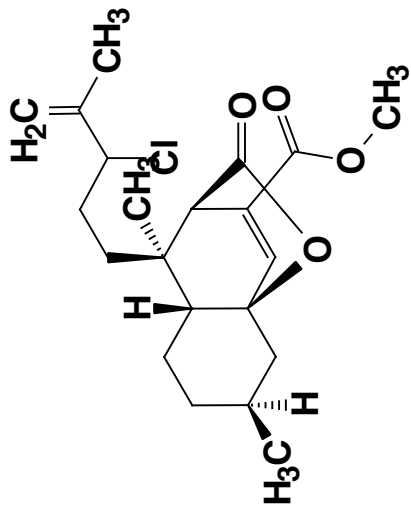

SI-46

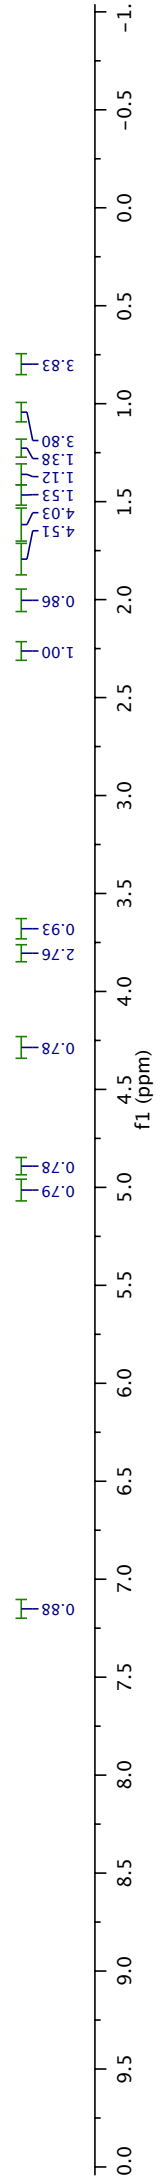

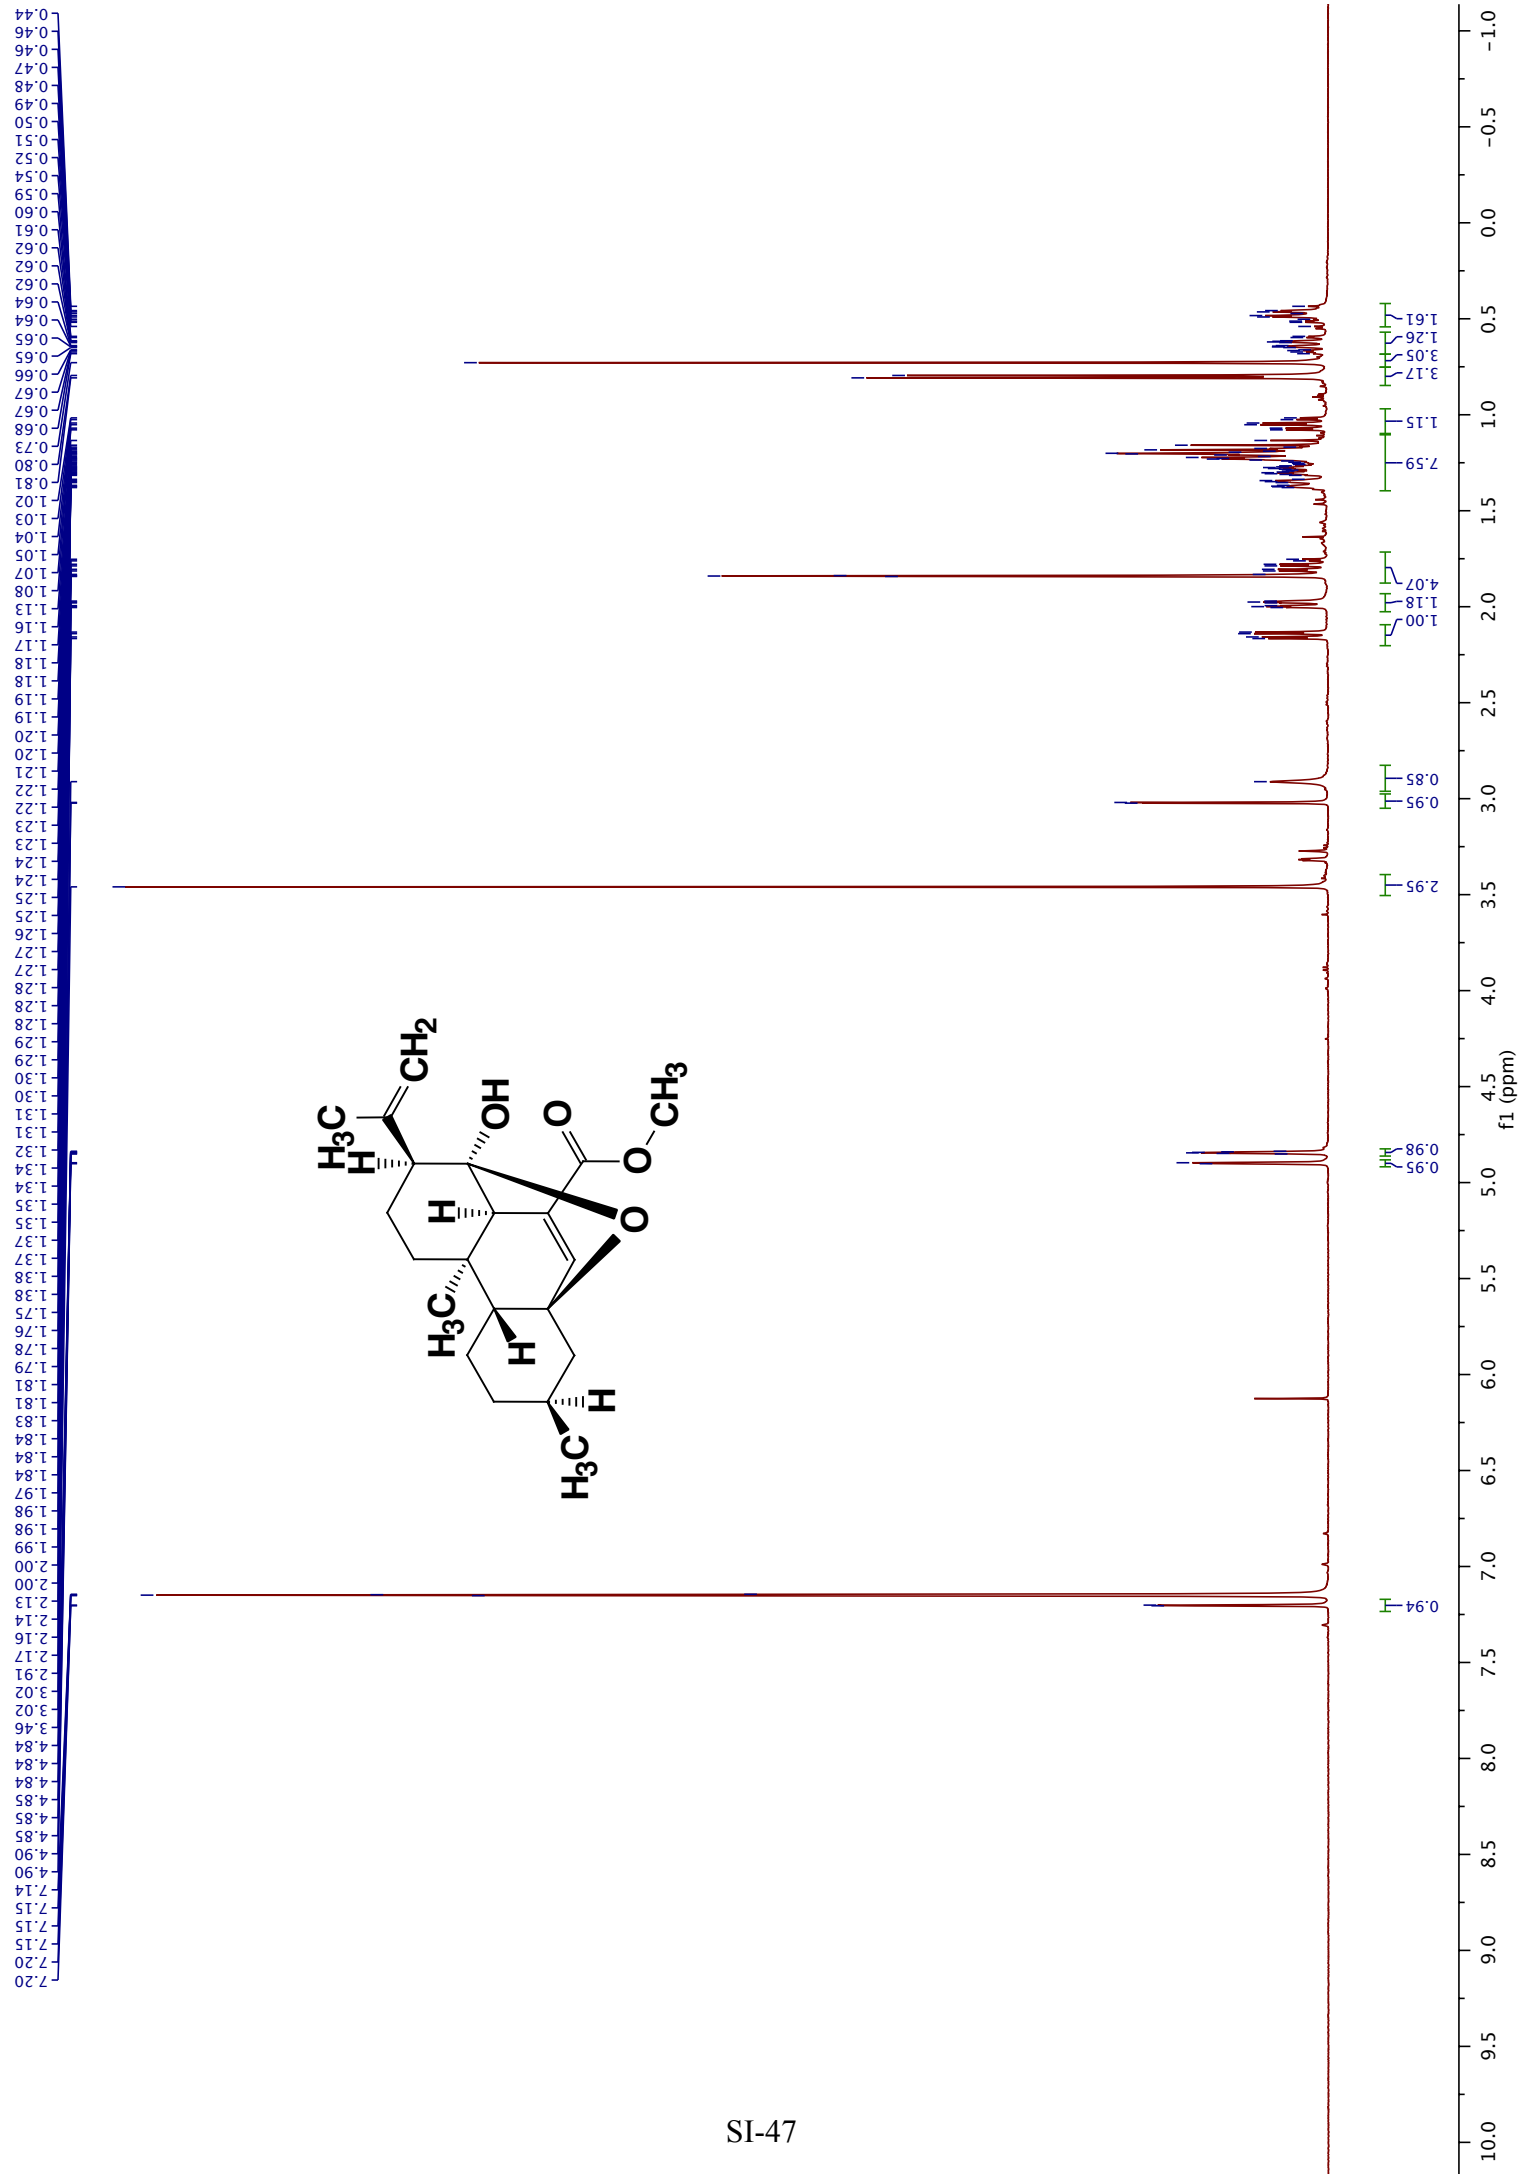

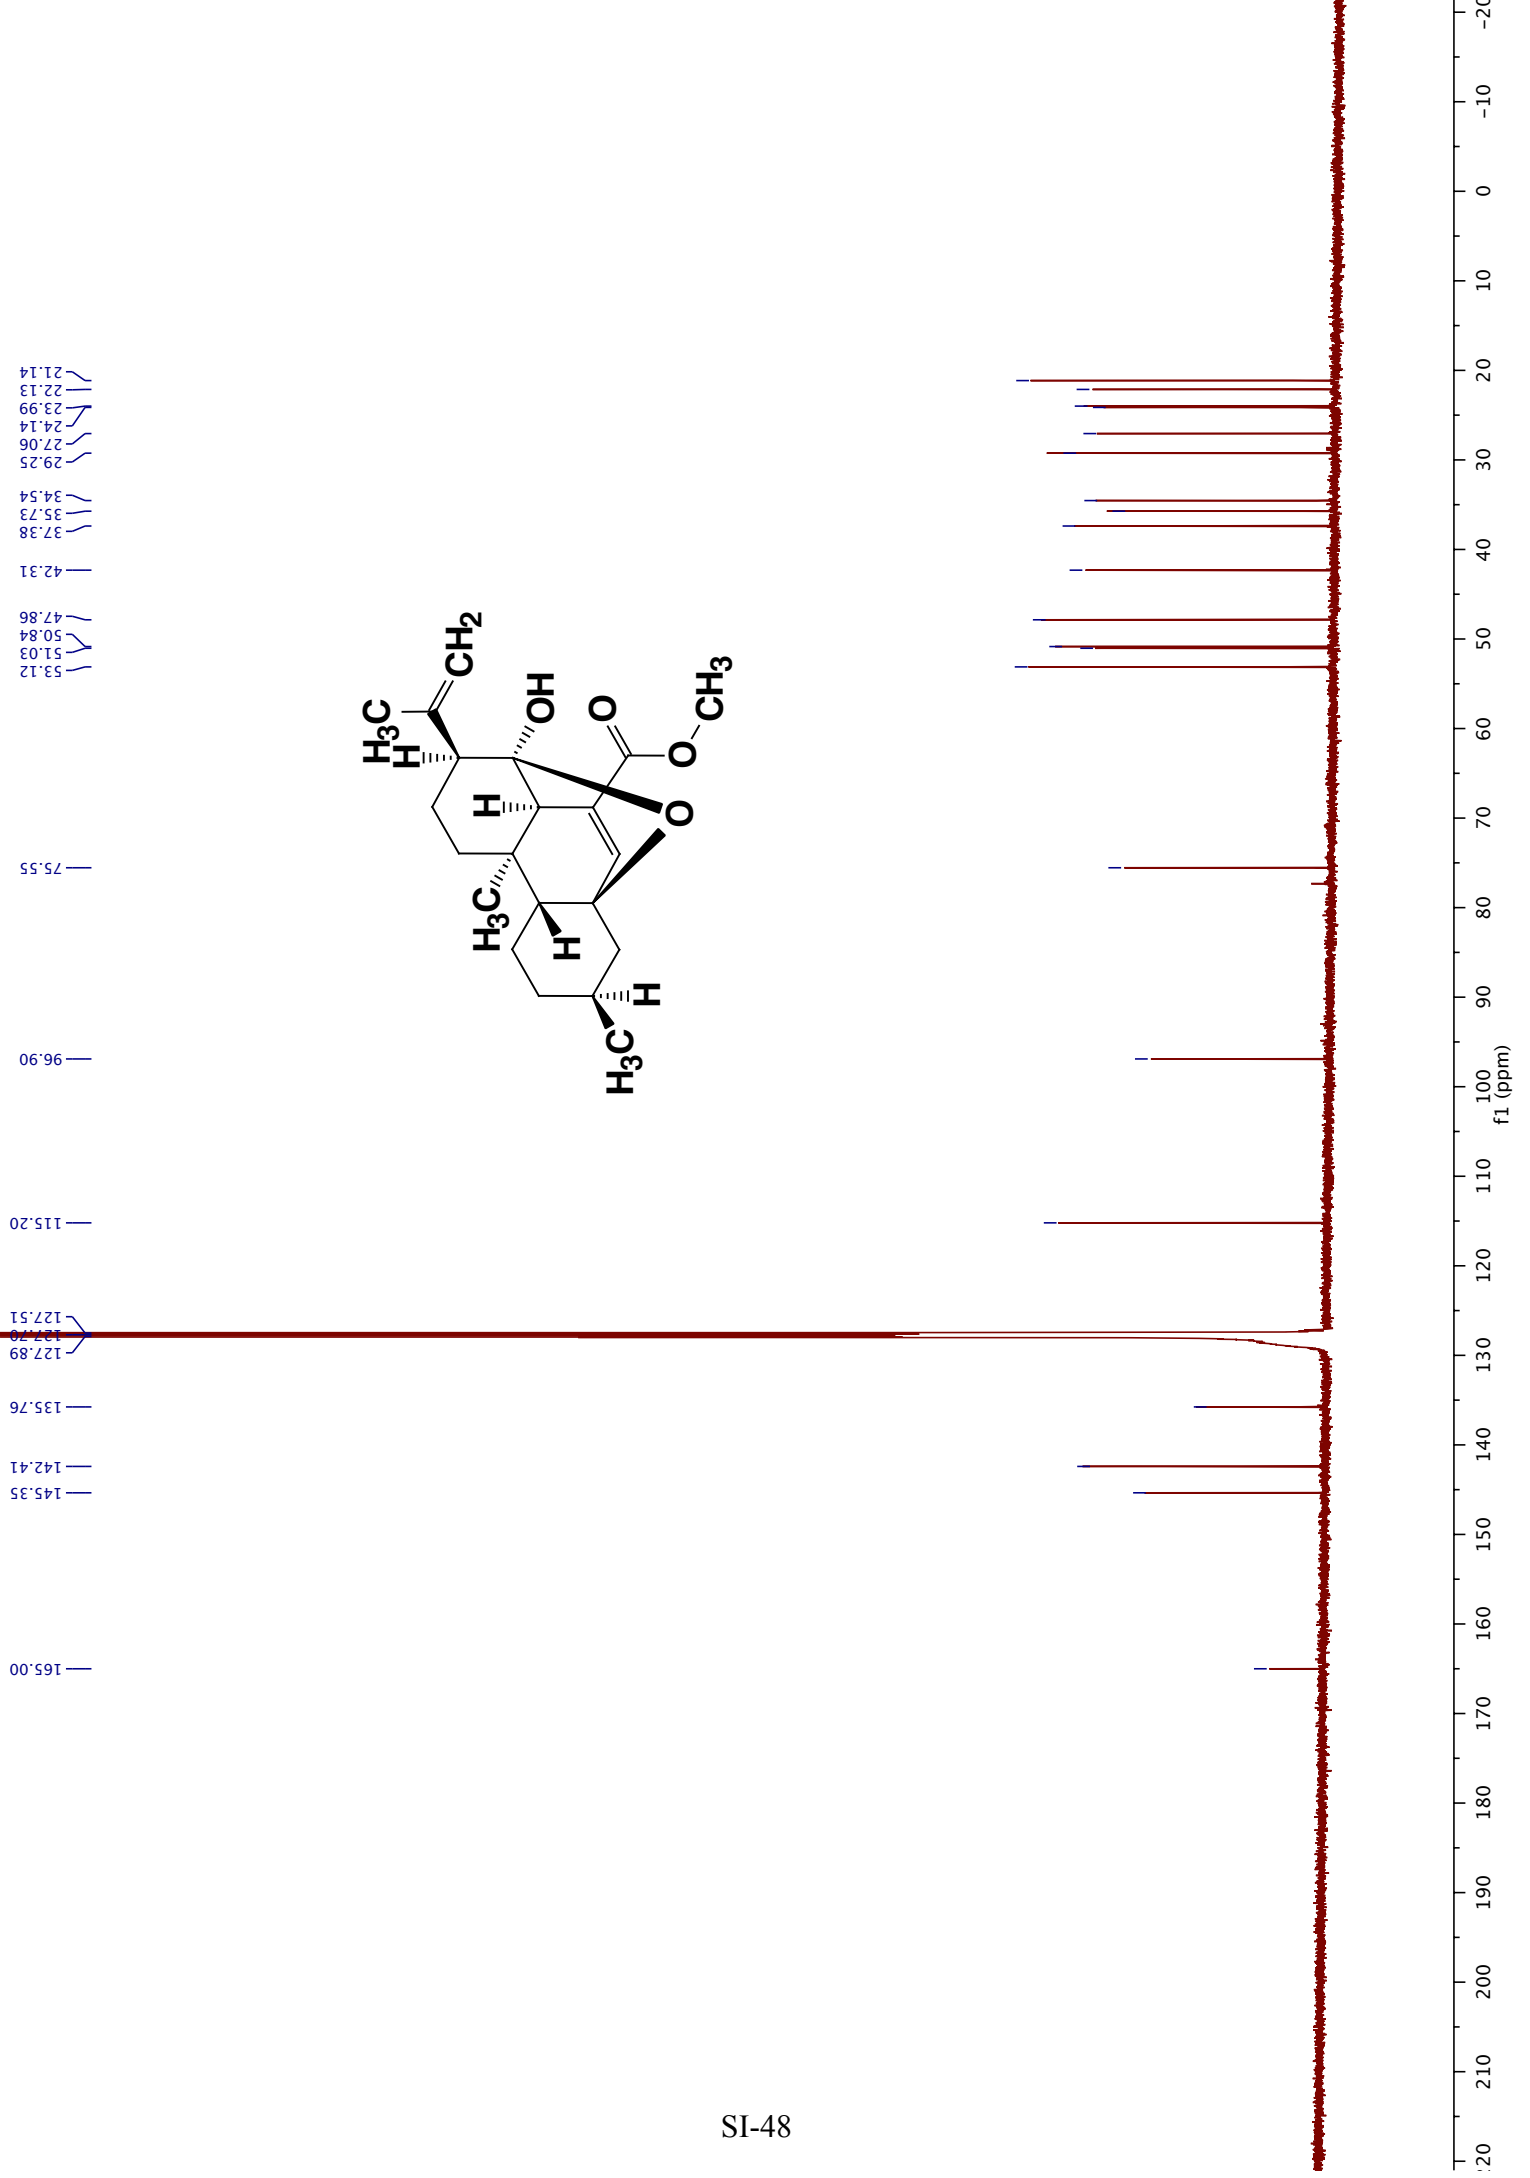



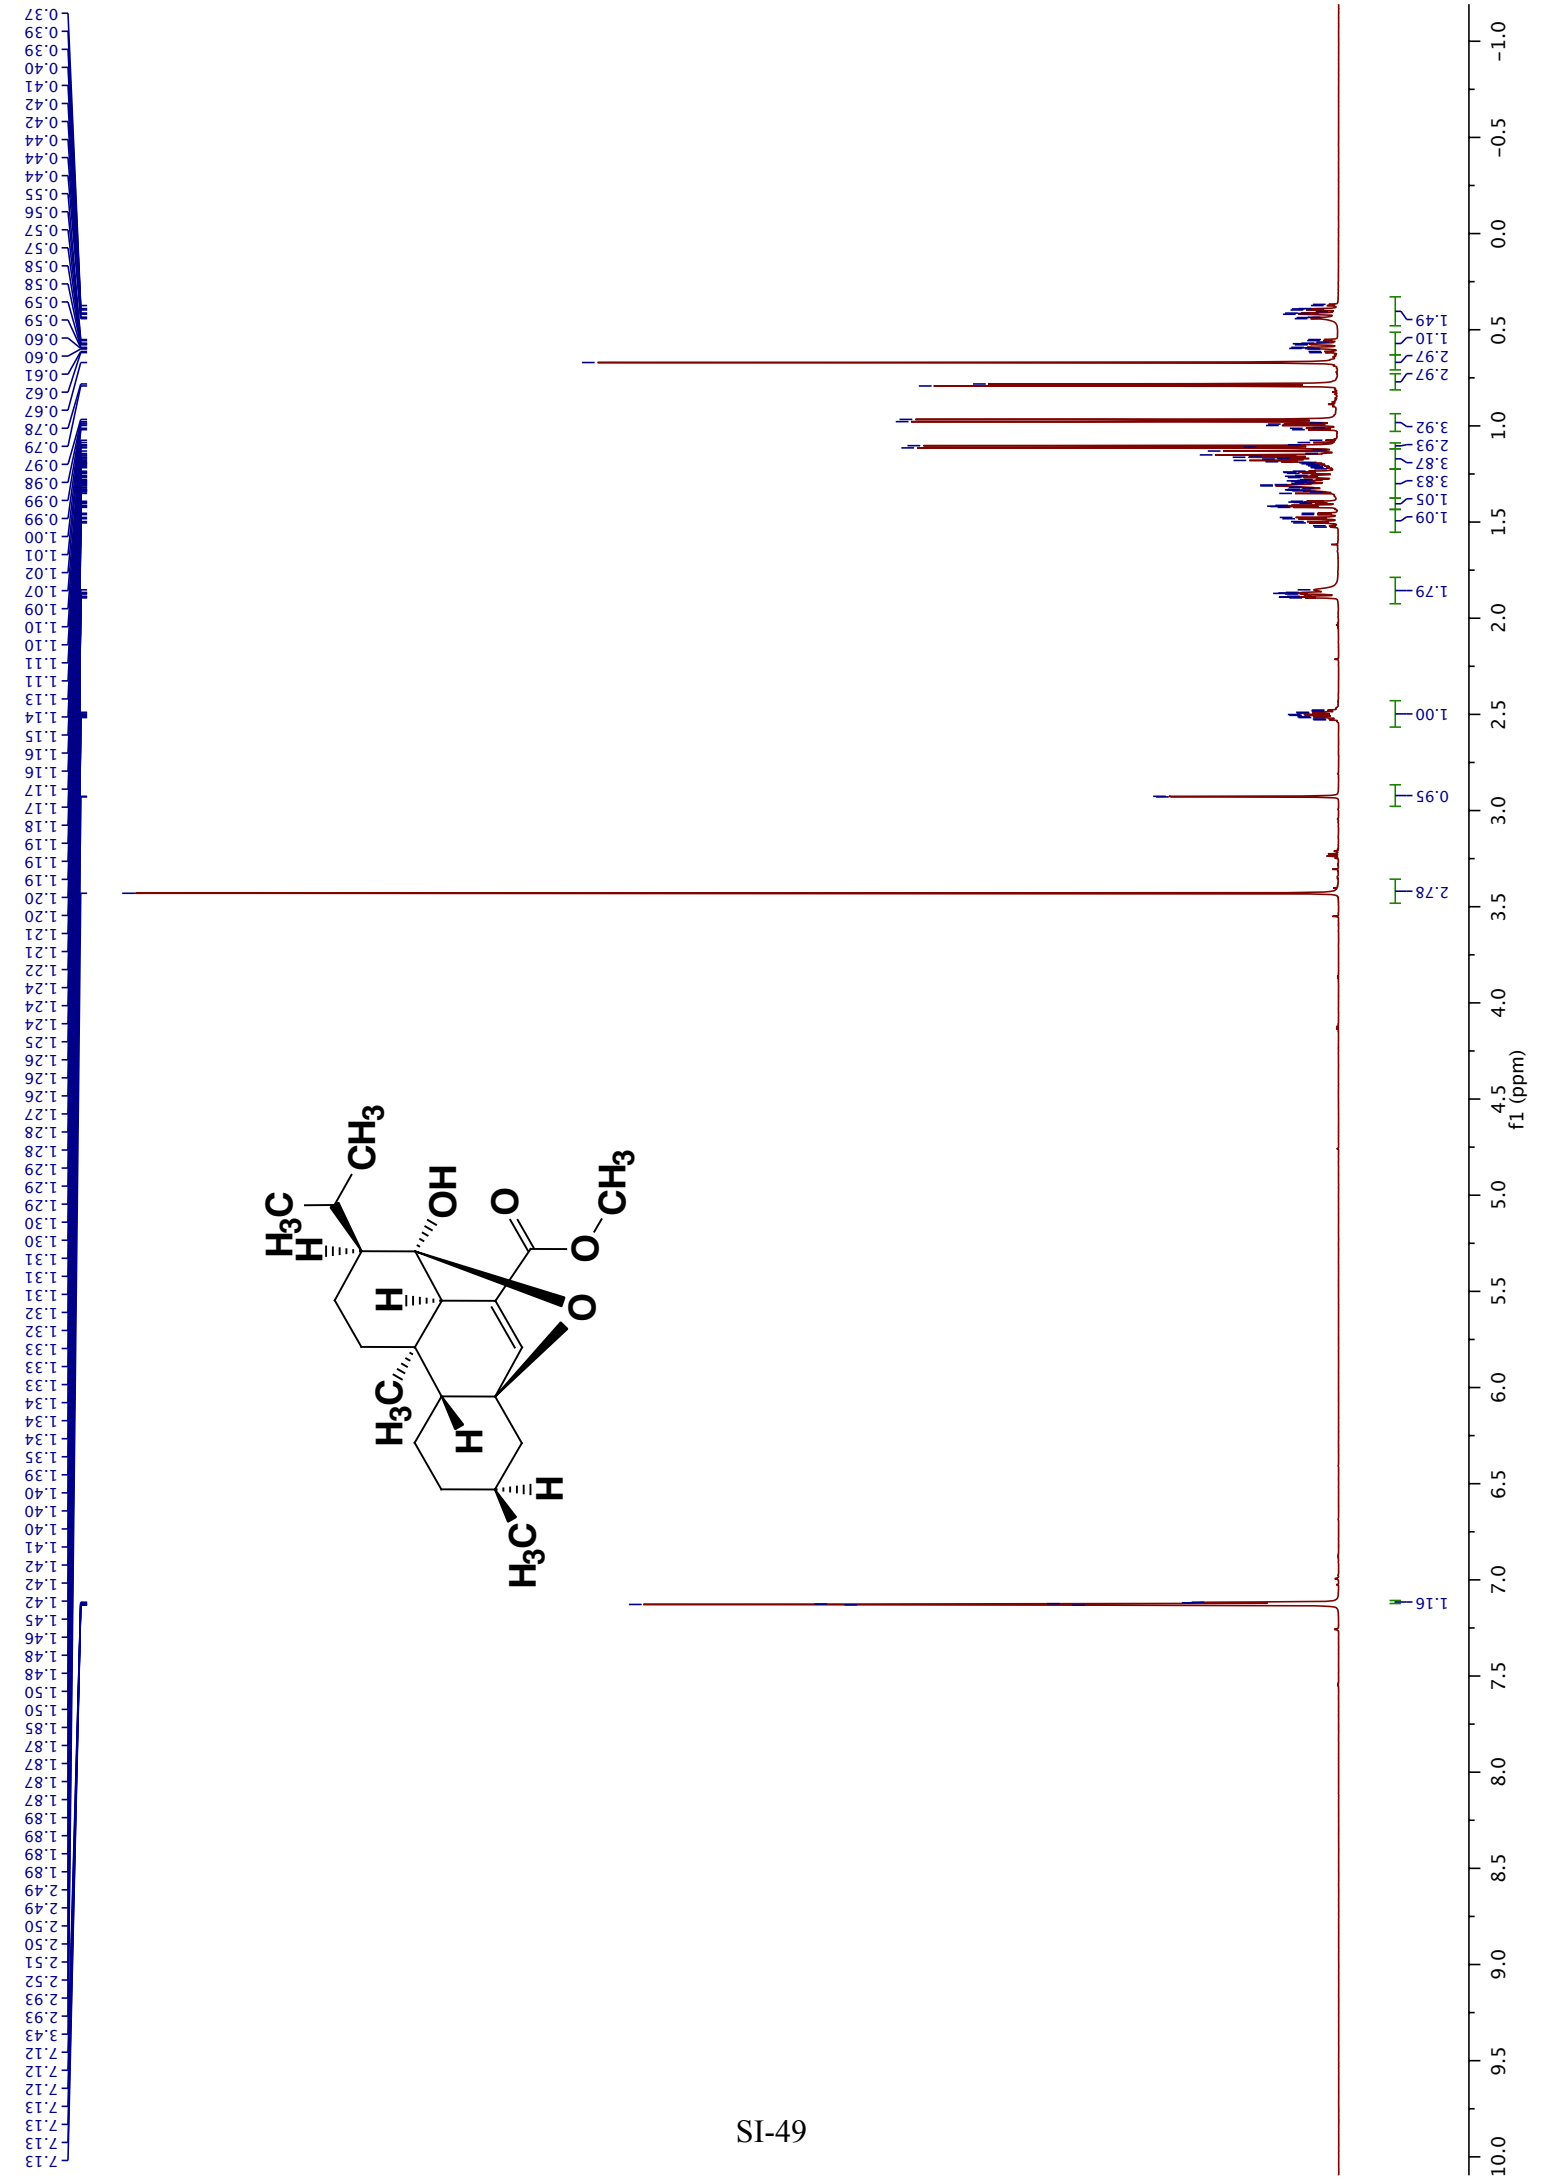

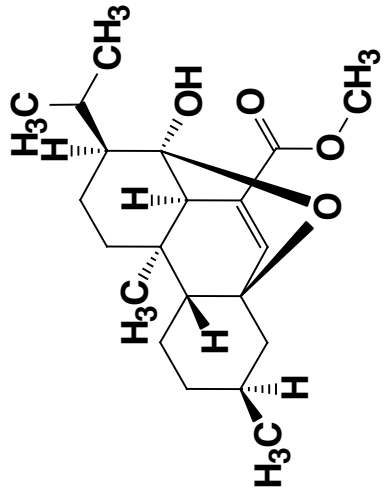

18.34  
22.02  
22.85  
24.13  
25.41  
27.04  
29.22  
34.41  
35.85  
37.60  
42.18  
47.50  
51.03  
52.84

75.43  
98.83

127.47  
127.63  
127.79  
135.85  
143.36  
164.85

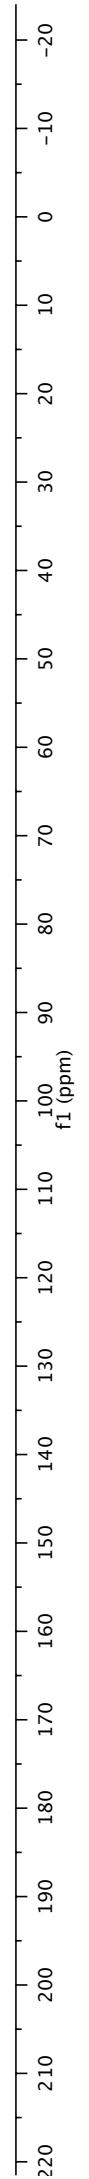

0.94  
0.95  
1.00  
1.02  
1.03  
1.03  
1.05  
1.06  
1.07  
1.08  
1.08  
1.09  
1.10  
1.21  
1.21  
1.22  
1.23  
1.24  
1.24  
1.25  
1.25  
1.26  
1.30  
1.30  
1.32  
1.32  
1.33  
1.34  
1.35  
1.36  
1.37  
1.49  
1.50  
1.50  
1.50  
1.51  
1.52  
1.52  
1.53  
1.53  
1.53  
1.54  
1.55  
1.56  
1.57  
1.57  
1.58  
1.58  
1.59  
1.60  
1.67  
1.67  
1.69  
1.73  
1.73  
1.74  
1.75  
1.75  
1.76  
1.77  
1.80  
1.81  
1.81  
1.82  
1.82  
1.83  
1.83  
1.84  
1.92  
1.93  
1.94  
1.95  
1.96  
1.97  
2.00  
2.01  
2.02  
2.03  
2.33  
2.34  
2.34  
2.34  
2.36  
2.36  
2.36  
2.37  
5.04  
5.04  
5.04  
5.05  
5.05  
5.06  
5.06  
5.06  
5.07  
5.07  
5.23  
5.23  
5.47  
5.48  
5.48  
5.48  
7.26

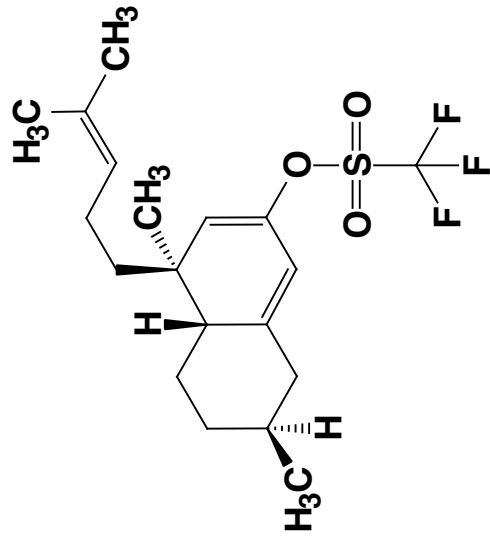

3.24  
3.07  
1.31  
2.38  
1.33  
1.32  
3.14  
4.27  
1.89  
1.35  
2.09  
1.06  
1.06  
1.00  
0.99  
1.00

-1.0  
-0.5  
0.0  
0.5  
1.0  
1.5  
2.0  
2.5  
3.0  
3.5  
4.0  
4.5  
5.0  
5.5  
6.0  
6.5  
7.0  
7.5  
8.0  
8.5  
9.0  
9.5

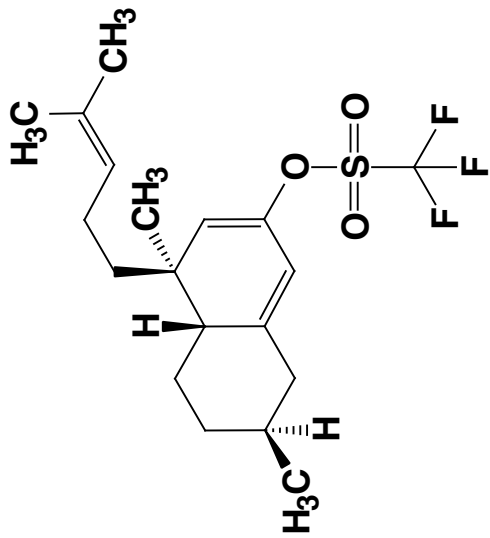

17.69  
22.39  
22.42  
23.29  
25.82  
27.72  
35.34  
36.38  
38.41  
42.08  
43.95  
46.45

76.95  
77.16  
77.37

111.84  
115.58  
117.70  
119.83  
120.85  
121.95  
124.44

131.87

144.83  
149.45

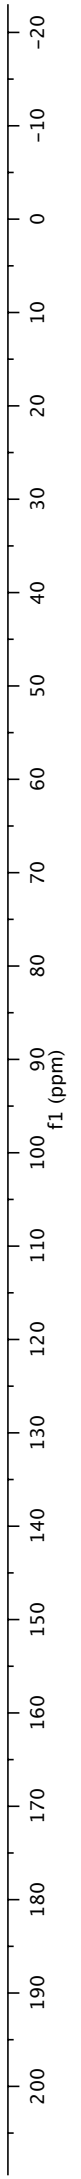

0.71  
0.71  
0.72  
0.72  
0.73  
0.74  
0.75  
0.76  
0.85  
0.86  
1.06  
1.07  
1.07  
1.07  
1.09  
1.09  
1.09  
1.11  
1.12  
1.14  
1.20  
1.21  
1.21  
1.22  
1.23  
1.25  
1.25  
1.26  
1.27  
1.30  
1.30  
1.31  
1.31  
1.32  
1.32  
1.33  
1.33  
1.34  
1.34  
1.35  
1.35  
1.36  
1.36  
1.37  
1.37  
1.37  
1.38  
1.38  
1.38  
1.39  
1.40  
1.40  
1.41  
1.41  
1.42  
1.42  
1.42  
1.43  
1.43  
1.44  
1.44  
1.45  
1.46  
1.46  
1.47  
1.47  
1.50  
1.51  
1.52  
1.53  
1.54  
1.54  
1.55  
1.57  
1.57  
1.60  
1.61  
1.62  
1.62  
1.63  
1.64  
1.65  
1.78  
1.78  
1.79  
1.80  
1.81  
1.98  
1.99  
2.00  
2.00  
3.09  
3.10  
4.61  
4.61  
4.62  
4.78  
4.78  
4.78  
6.93  
6.93  
6.93  
6.93  
7.26

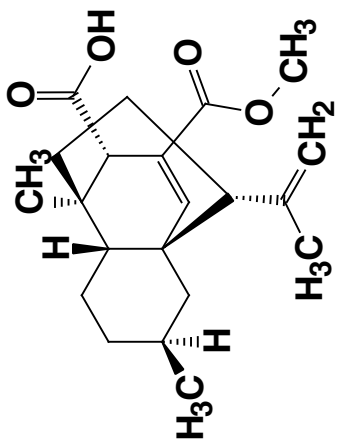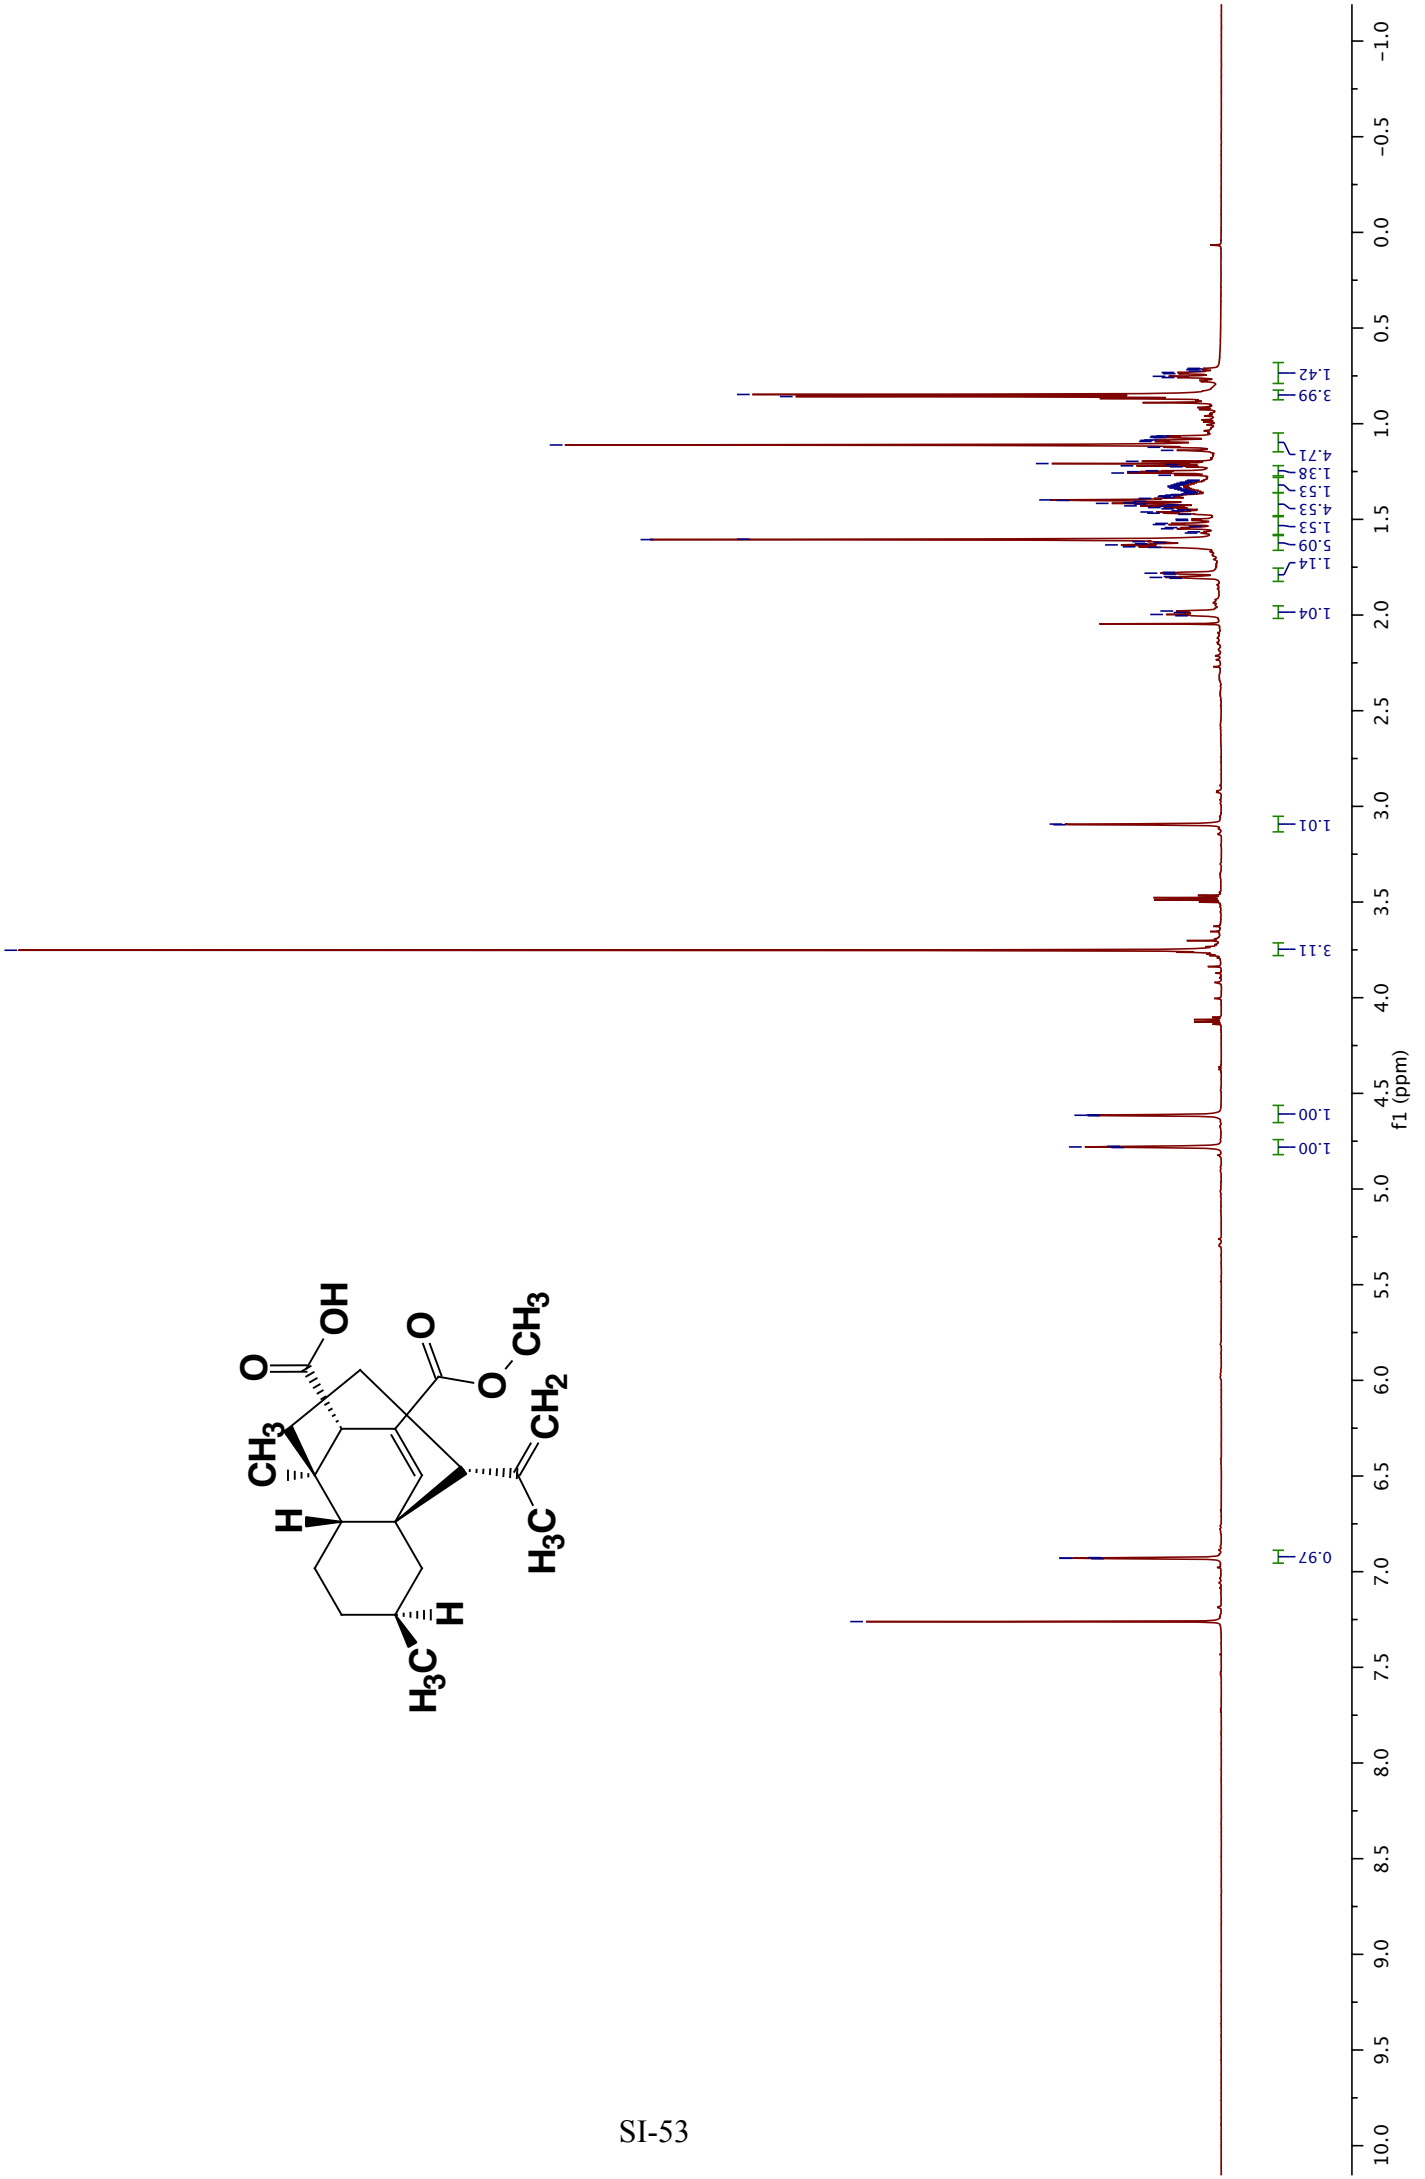

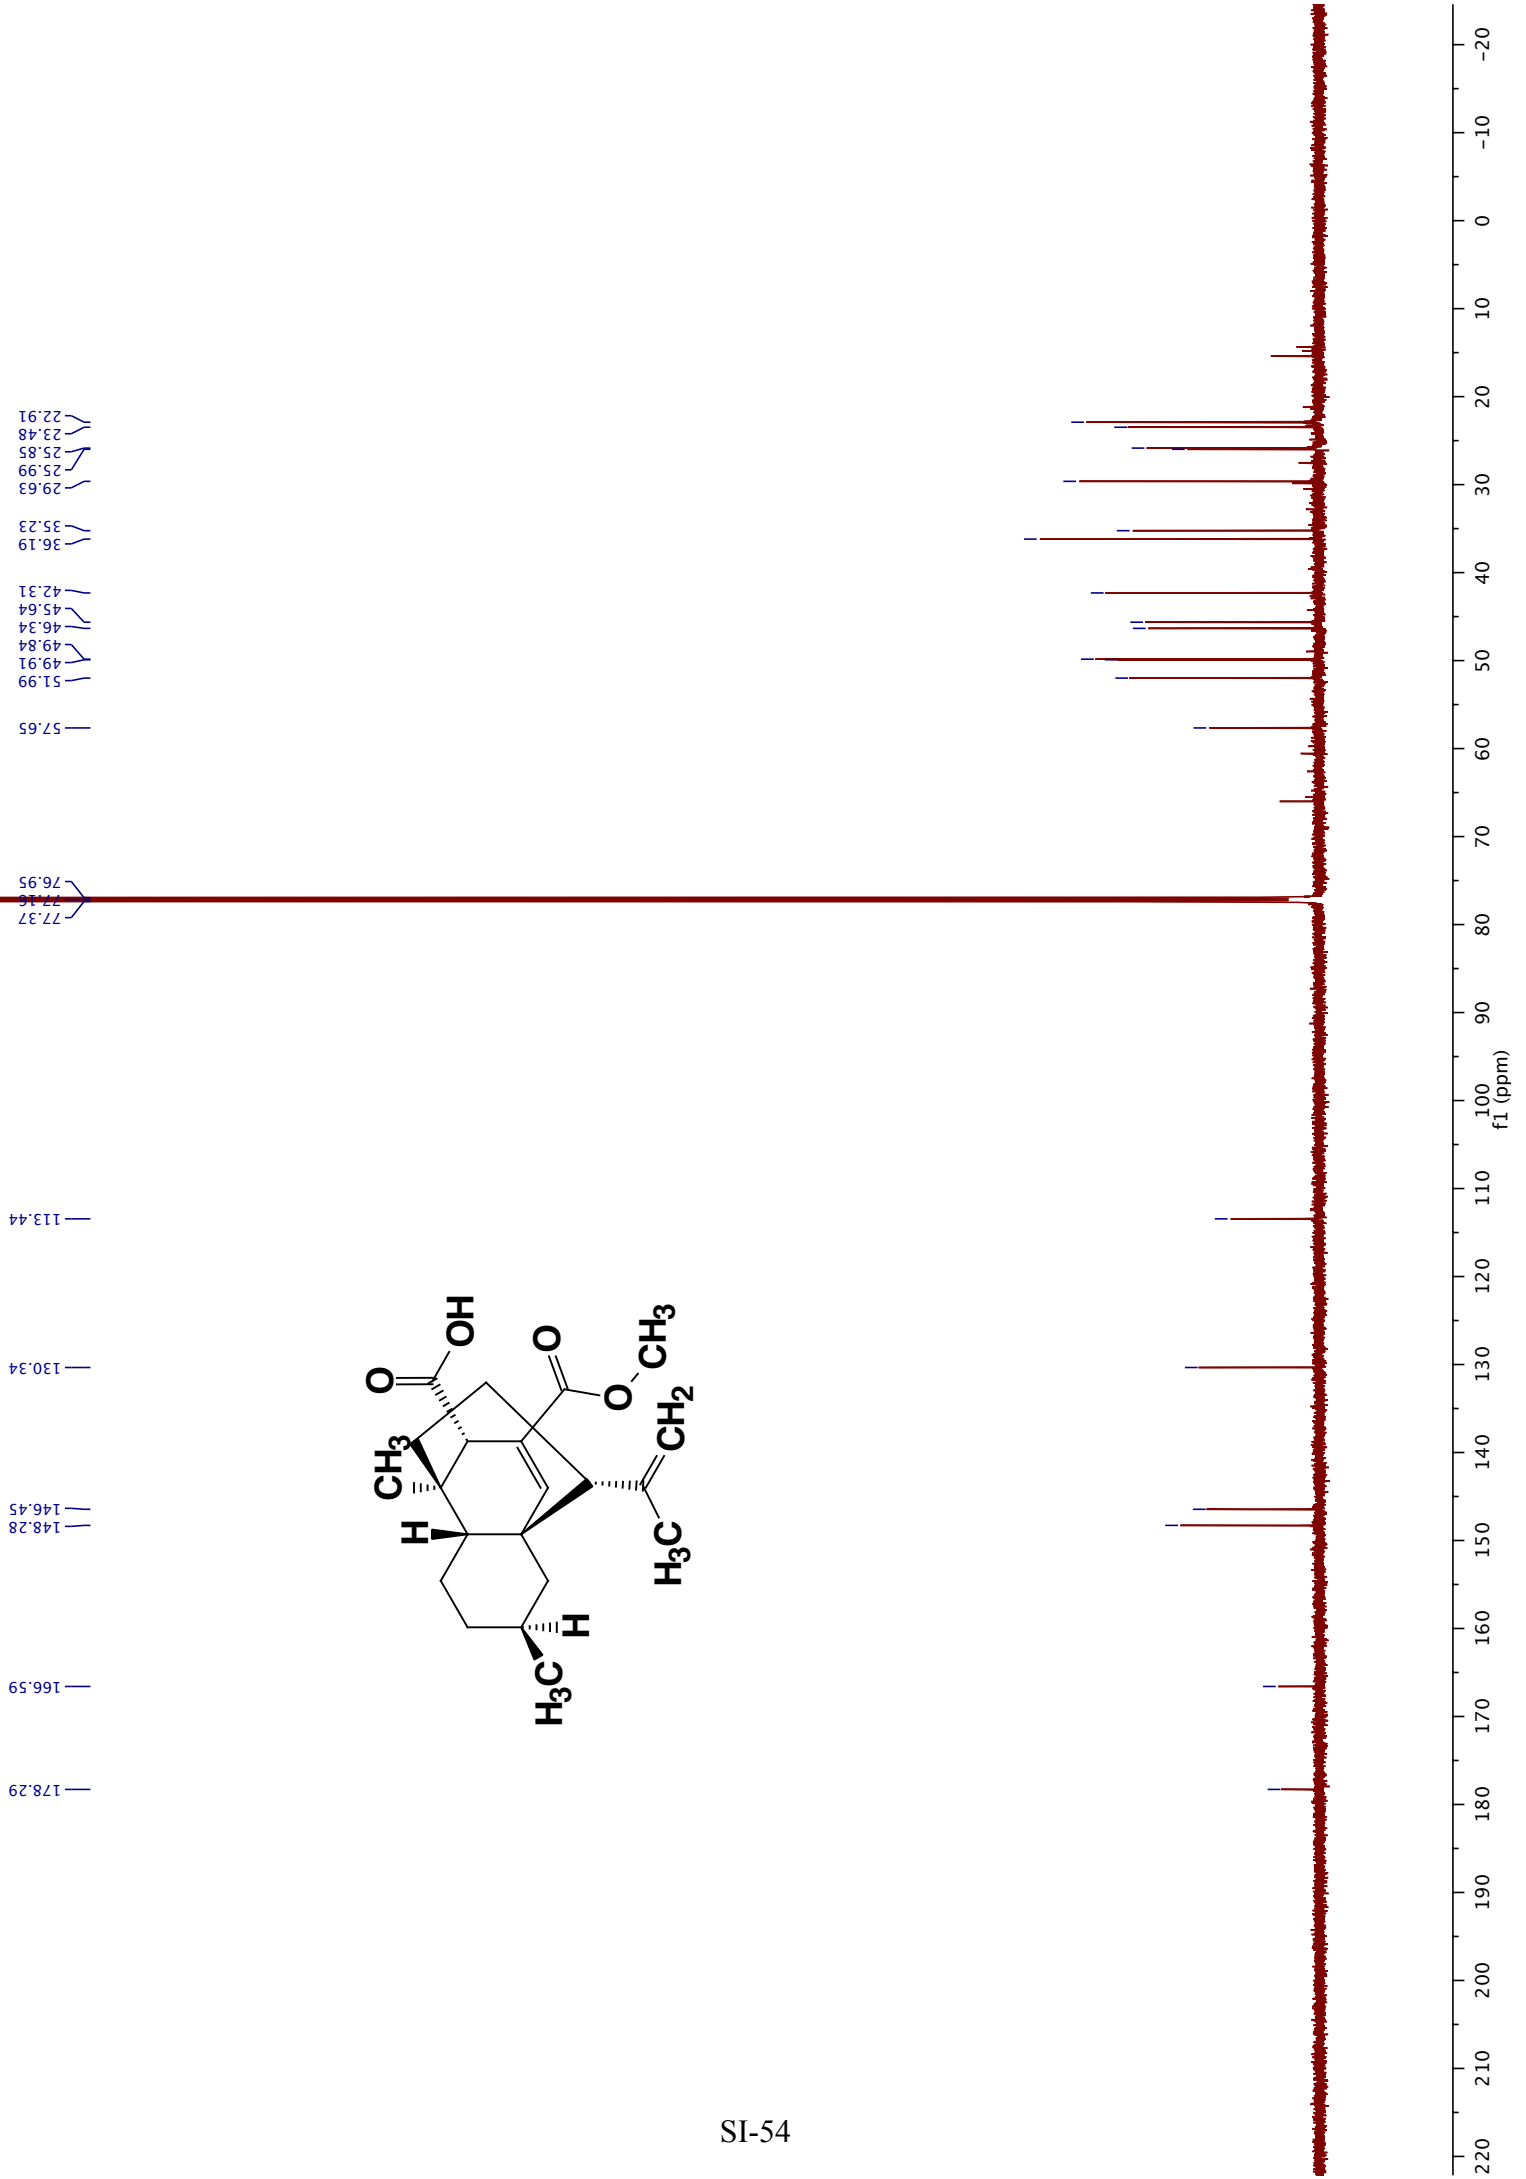

0.69  
0.64  
0.69  
0.70  
0.71  
0.72  
0.73  
0.74  
0.75  
0.76  
0.82  
0.83  
0.84  
0.85  
0.86  
0.87  
0.89  
0.99  
1.02  
1.03  
1.05  
1.05  
1.06  
1.07  
1.08  
1.09  
1.11  
1.20  
1.23  
1.24  
1.25  
1.28  
1.31  
1.32  
1.33  
1.34  
1.35  
1.36  
1.36  
1.38  
1.39  
1.40  
1.42  
1.42  
1.43  
1.43  
1.44  
1.44  
1.45  
1.46  
1.46  
1.48  
1.48  
1.50  
1.50  
1.52  
1.53  
1.54  
1.55  
1.61  
1.63  
1.64  
1.65  
1.65  
1.66  
1.67  
2.06  
2.08  
2.09  
2.15  
2.16  
2.17  
2.18  
2.18  
2.19  
3.04  
3.05  
3.74  
3.74

6.97  
6.97  
7.26  
7.26

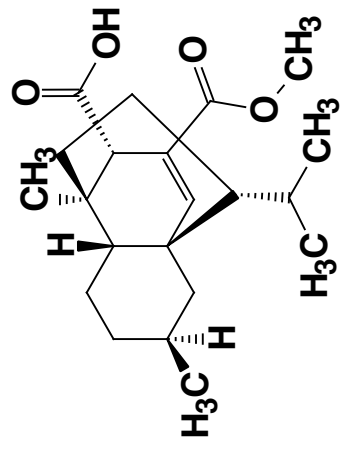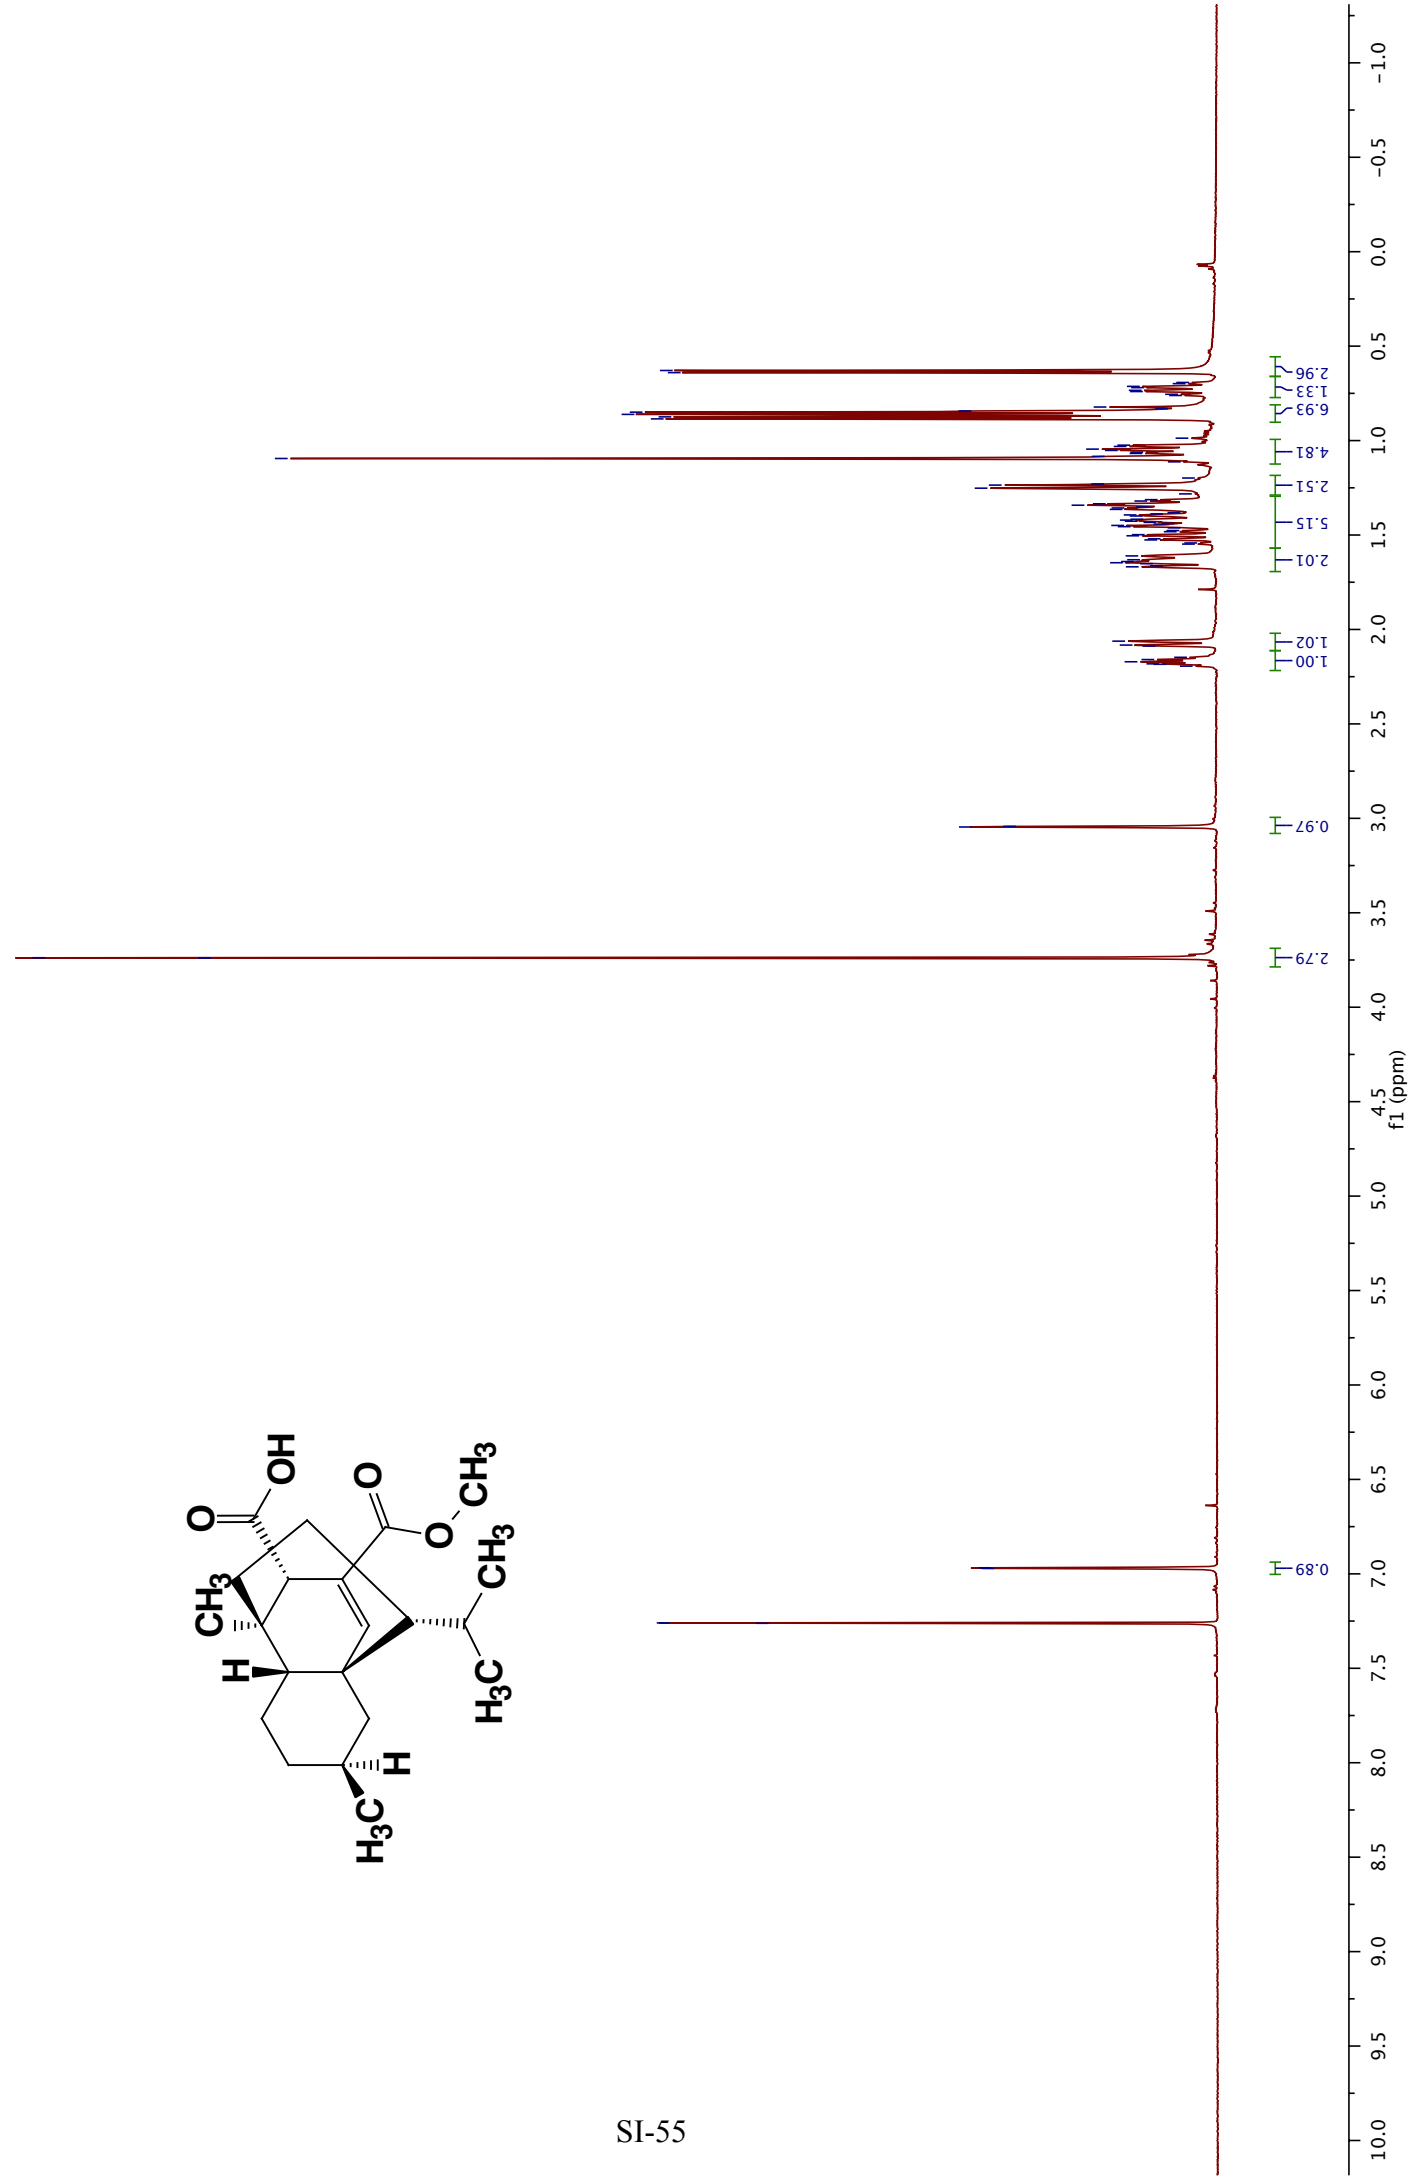

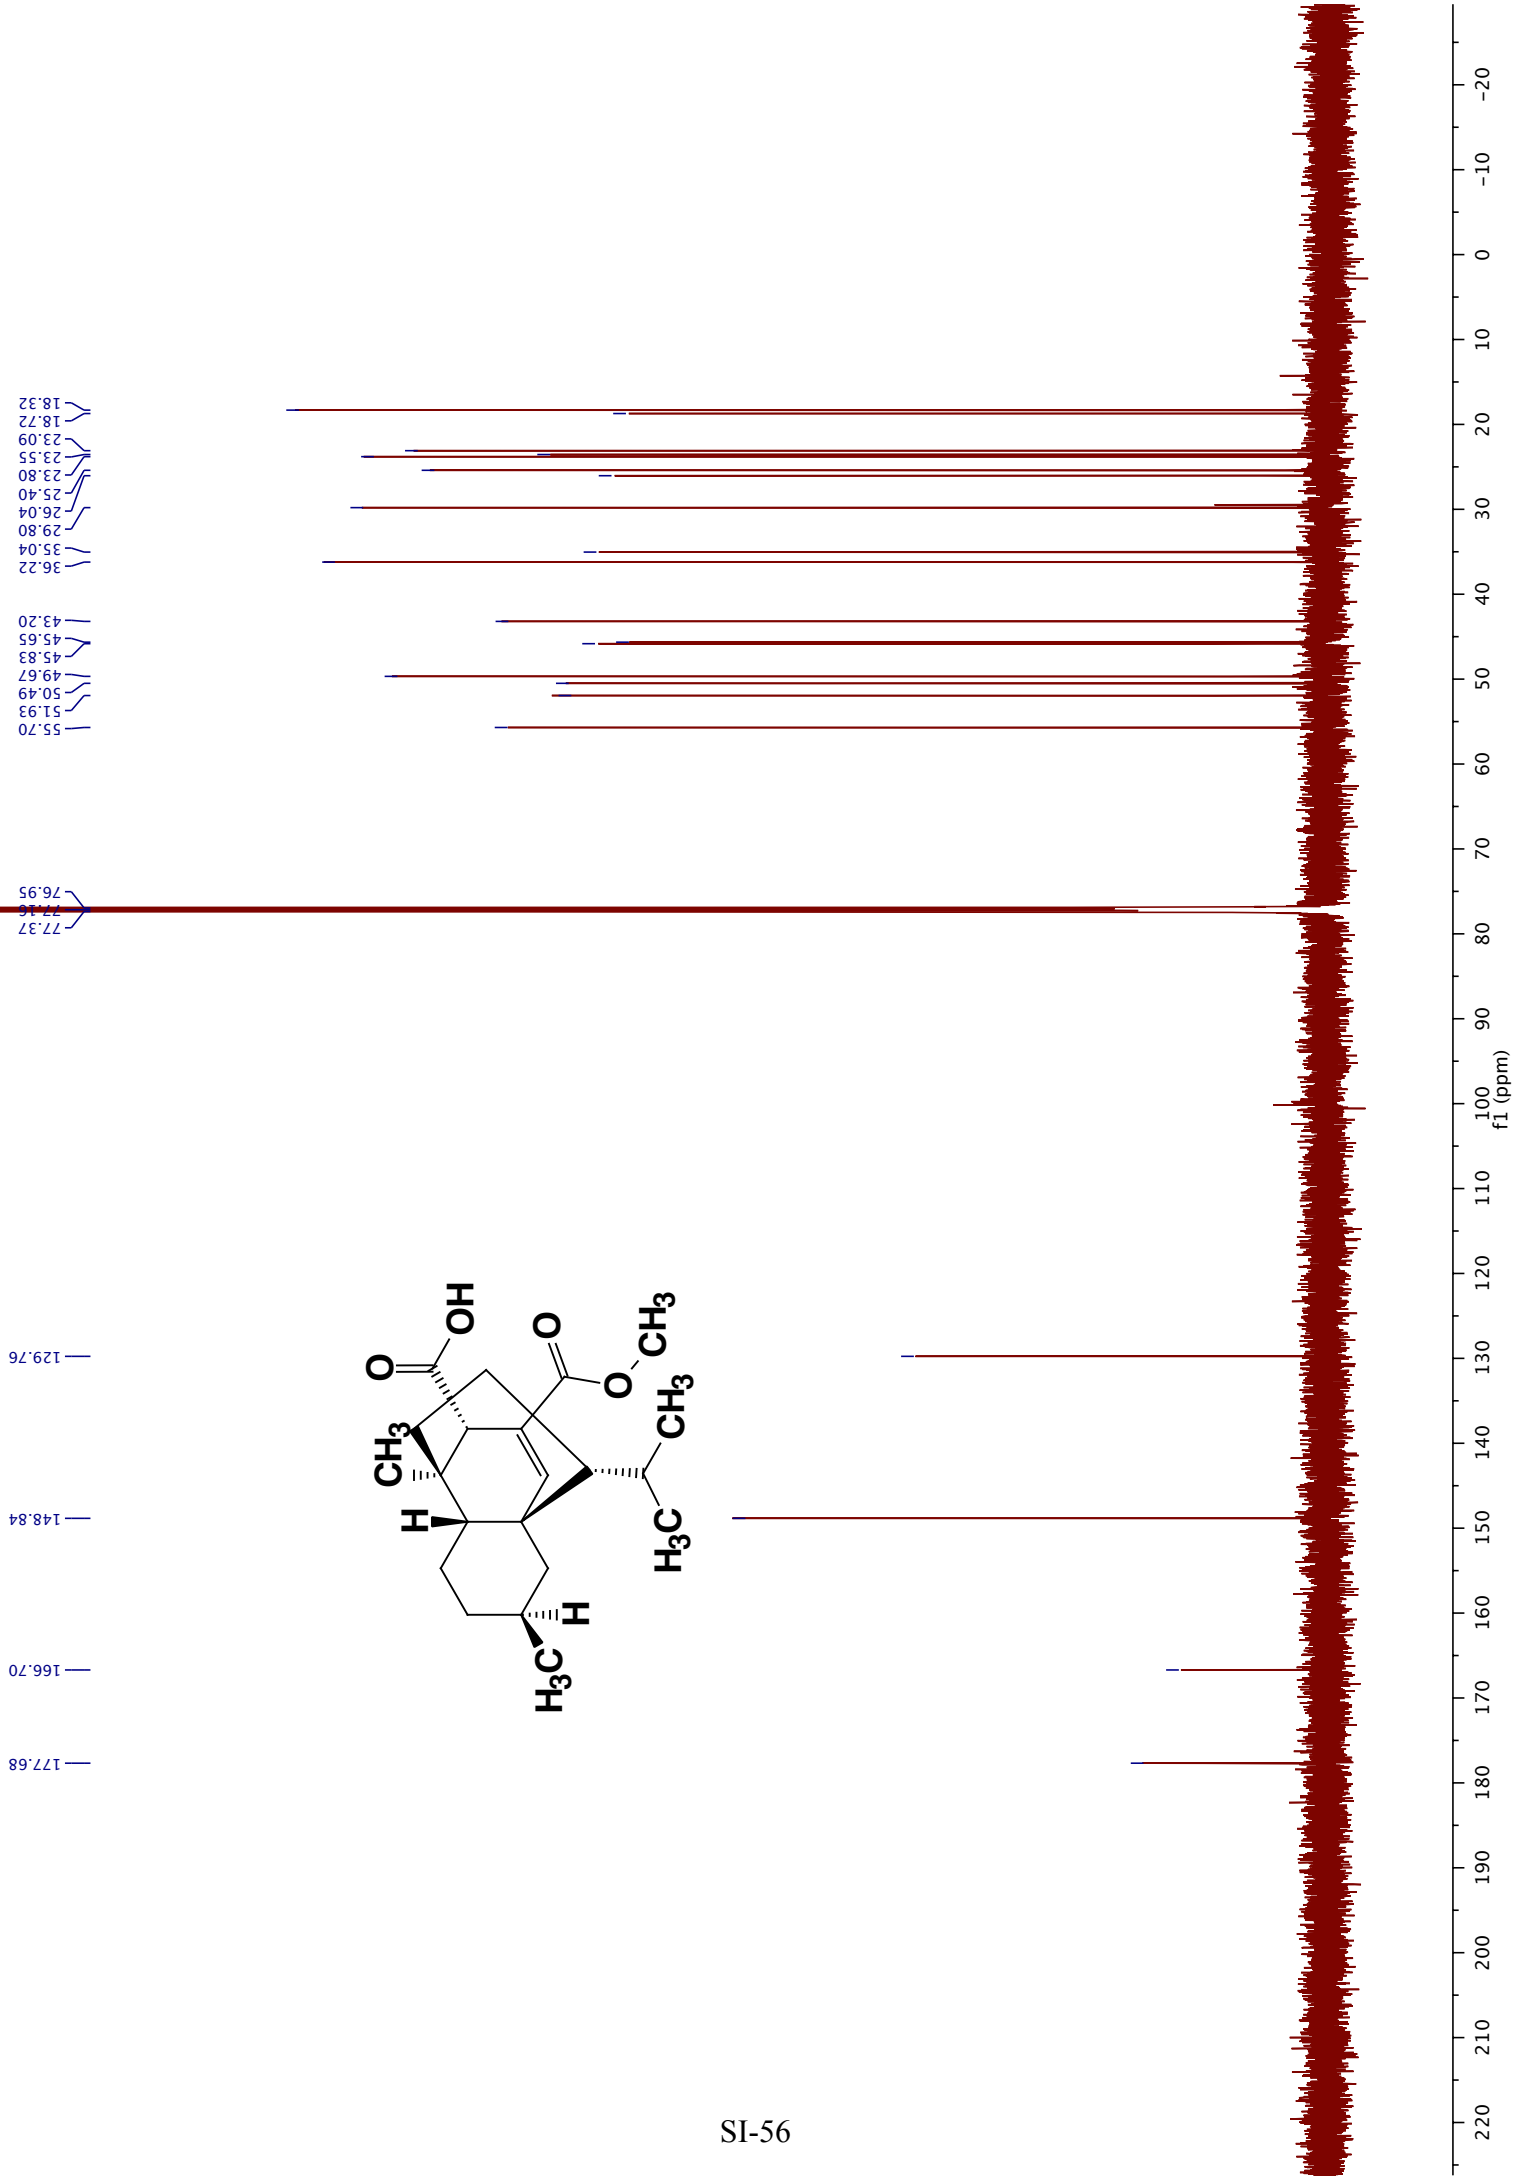



**Synthetic Chatancin:  $^1\text{H}$  NMR in  $\text{C}_6\text{D}_6$  (this work)**

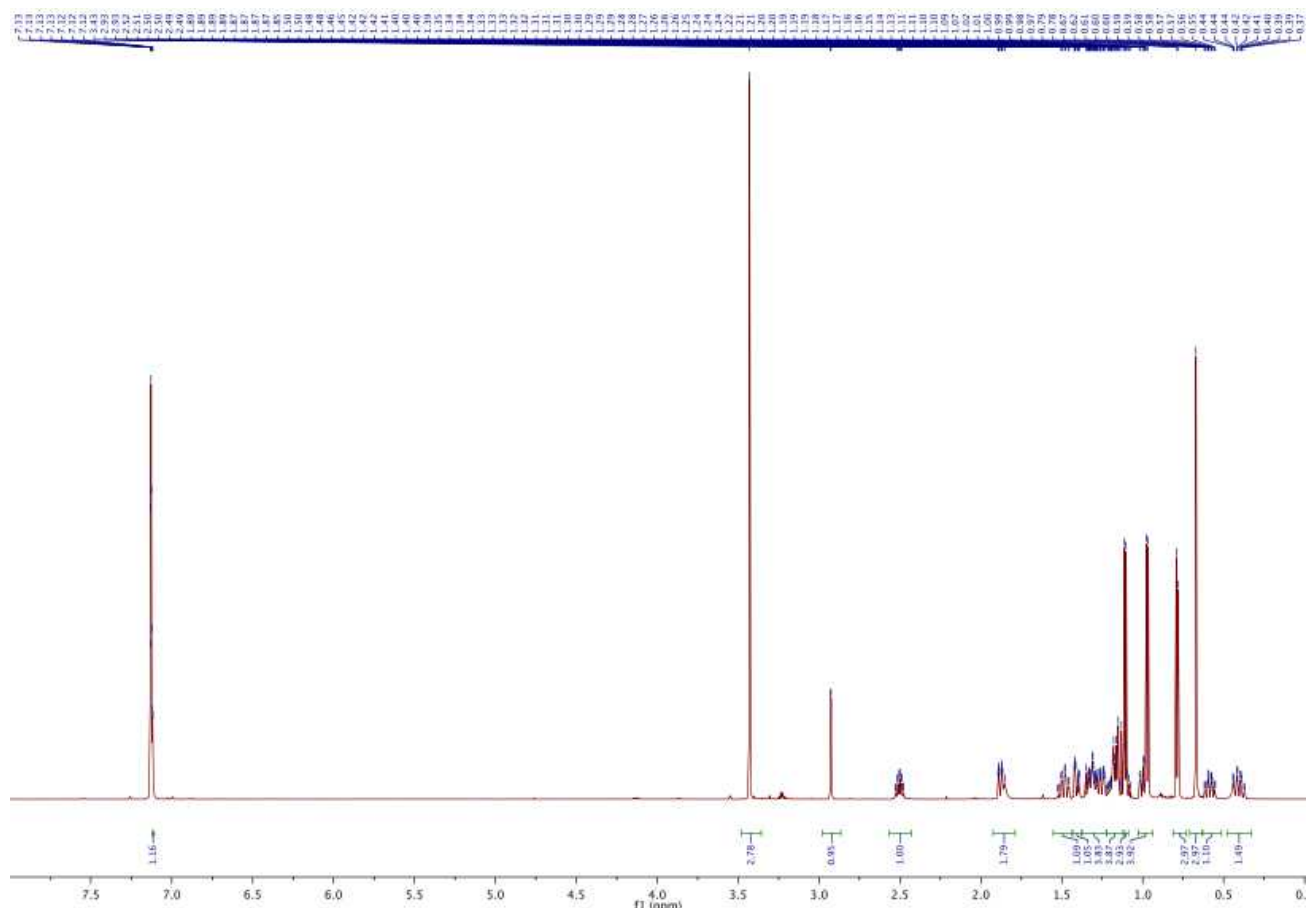

**Synthetic Chatancin:  $^1\text{H}$  NMR in  $\text{C}_6\text{D}_6$  (from Ref. 9)**

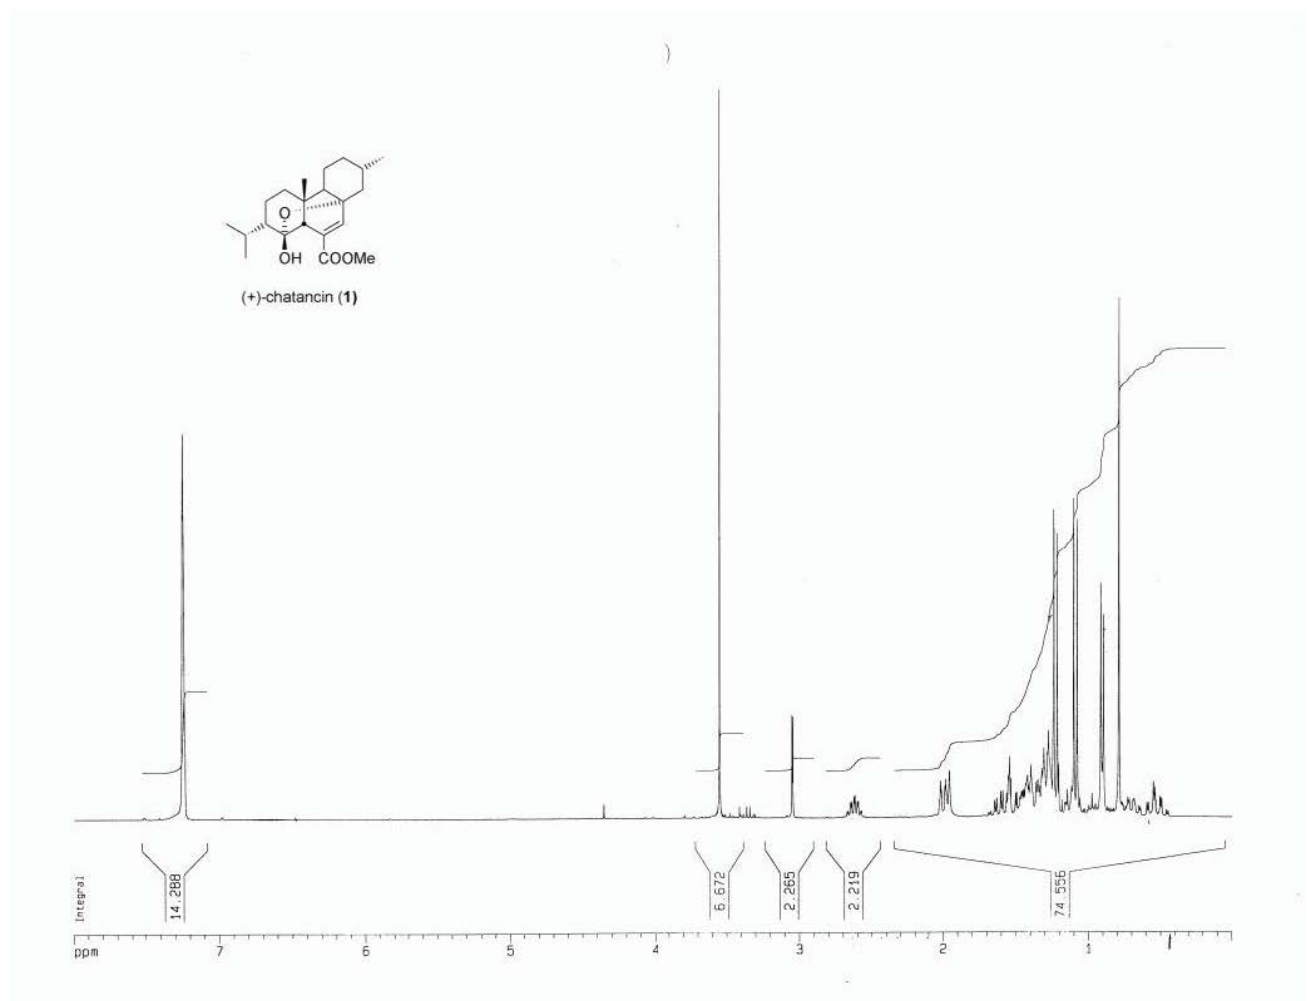

Supplement: NIHMS647081-supplement-Supporting_Information.pdf [file NIHMS647081-supplement-Supporting_Information.pdf]
